# Supplementary material for: Chronic PFOA and PFOS exposure triggers cellular oxidative stress and alters lipid levels as revealed through multi-omics analysis
Source: Royal Society of Chemistry journal article supplement (doi:10.1039/d5va00353a), 2026-02-25
Supplement: d5va00353a4.xlsx [file d5va00353a4.xlsx]

## Sheet: Read_me
Tab: DEGs_high_in_PFOA
Highly expressed genes in PFOA in comparison to PFOS at 24 weeks
Tab: DEGs_high_in_PFOS
Highly expressed genes in PFOS in comparison to PFOA at 24 weeks
Column	Column description
ID	ENSEMBL gene ID
Gene.name	Gene name corresponding to ENSEMBL gene ID
RPE1-24w-PFOA-a	PFOA condition at 24 weeks replicate 1
RPE1-24w-PFOA-b	PFOA condition at 24 weeks replicate 2
RPE1-24w-PFOA-c	PFOA condition at 24 weeks replicate 3
RPE1-24w-PFOS-a	PFOS condition at 24 weeks replicate 1
RPE1-24w-PFOS-b	PFOS condition at 24 weeks replicate 2
RPE1-24w-PFOS-c	PFOS condition at 24 weeks replicate 3
Tab: GO_high_in_PFOA
Gene ontology (GO) enrichment results (|log₂FoldChange| > 1, p < 0.05) for highly expressed genes in PFOA in comparison to PFOS at 24 weeks
Tab: GO_high_in_PFOS
Gene ontology (GO) enrichment results (|log₂FoldChange| > 1, p < 0.05) for highly expressed genes in PFOS in comparison to PFOA at 24 weeks

## Sheet: DEGs_high_in_PFOA
ID	log2FoldChange	pvalue	padj	RPE1-24w-PFOA-a	RPE1-24w-PFOA-b	RPE1-24w-PFOA-c	RPE1-24w-PFOS-a	RPE1-24w-PFOS-b	RPE1-24w-PFOS-c	Gene.name
ENSG00000086696	-7.0057	2.11631085246147e-72	6.741125483446939e-70	615.563	558.19	708.682	7.42351	5.29399	1.9856	HSD17B2
ENSG00000184809	-6.7337	5.12028304503894e-8	5.86501587354842e-7	43.2373	30.4072	38.7258	0	0	0.9928	B3GALT5-AS1
ENSG00000156475	-6.20127	9.09264765835028e-7	8.43930738333305e-6	34.1347	20.2715	23.2355	0	0	0.9928	PPP2R2B
ENSG00000133083	-6.1814	3.30190074319009e-16	1.02984908388122e-14	97.8528	92.6696	92.9419	3.18151	0	0.9928	DCLK1
ENSG00000196660	-5.94542	3.04222391235549e-6	2.55011949562564e-5	23.8943	22.4434	18.072	0	0	0.9928	SLC30A10
ENSG00000237975	-5.87372	3.2234199671237604e-14	8.48116350225129e-13	73.9585	62.9864	91.6511	0	3.52933	0	FLG-AS1
ENSG00000150510	-5.3914	1.91273848410547e-14	5.11350140098983e-13	55.7534	65.8823	83.9059	3.18151	0.882332	0.9928	FAM124A
ENSG00000143631	-5.21028	3.47243413728441e-13	8.21260844696443e-12	73.9585	45.6108	61.9613	0	0.882332	3.9712	FLG
ENSG00000075340	-5.09526	1.43040860146516e-19	5.83357970154408e-18	91.0259	93.3936	81.3242	3.18151	1.76466	2.9784	ADD2
ENSG00000180875	-4.94855	3.92927600153178e-29	2.95603974969509e-27	137.677	113.665	170.394	3.18151	7.94099	1.9856	GREM2
ENSG00000227906	-4.84658	8.09418329203754e-17	2.6868740147471e-15	70.5451	59.3665	96.8145	2.121	0.882332	4.964	SNAP25-AS1
ENSG00000053108	-4.65323	6.16967560858141e-7	5.90954661139298e-6	87.6124	76.0181	92.9419	8.48402	0	1.9856	FSTL4
ENSG00000162490	-4.6348	1.81414664219281e-36	1.92621201278501e-34	391.411	302.624	518.926	12.726	13.235	22.8344	DRAXIN
ENSG00000168646	-4.55008	7.92428870208918e-129	9.88621051324809e-126	608.736	623.348	642.848	36.0571	19.4113	25.8128	AXIN2
ENSG00000119686	-4.47863	2.30069152453384e-32	2.0260972243409497e-30	358.414	317.828	367.89511917772103	23.331	17.6466	5.9568	FLVCR2
ENSG00000251011	-4.47227	1.00630815953058e-26	6.6661236532444e-25	112.645	113.665	121.341	9.54452	2.647	3.9712	TMEM108-AS1
ENSG00000144476	-4.443	6.3272107883003895e-118	5.92029204447782e-115	683.832	551.674	802.915	29.6941	33.5286	29.784	ACKR3
ENSG00000103489	-4.35996	9.3028433068932e-6	7.04822202163452e-5	12.5161	18.0995	29.6898	0	0.882332	1.9856	XYLT1
ENSG00000026559	-4.31746	6.25474160829303e-28	4.3756886269979e-26	133.125	128.145	104.56	5.30251	9.70565	2.9784	KCNG1
ENSG00000157445	-4.20376	1.5860436854143e-33	1.48144882647097e-31	154.744	157.104	136.831	6.36301	3.52933	14.892	CACNA2D3
ENSG00000183638	-3.84835	7.3205426132328e-7	6.90150147750052e-6	17.0674	18.0995	50.3435	0	0.882332	4.964	RP1L1
ENSG00000123572	-3.76316	2.53334827288475e-13	6.08776195720025e-12	47.7886	56.4706	54.2161	3.18151	2.647	5.9568	NRK
ENSG00000087589	-3.7215	2.3569019674742e-39	2.96514112227364e-37	155.882	188.959	196.211	16.968	8.82332	15.8848	CASS4
ENSG00000167693	-3.70548	3.47517532814469e-177	8.67114163960902e-174	910.259	892.669	922.965	69.9931	80.2922	57.5824	NXN
ENSG00000227744	-3.69272	1.04480528099668e-10	1.8062101457045302e-9	35.2725	49.2307	40.0167	3.18151	4.41166	1.9856	LINC01940
ENSG00000152402	-3.69122	6.67481481587884e-17	2.2455876990679102e-15	71.6829	62.9864	78.7425	4.24201	8.82332	2.9784	GUCY1A2
ENSG00000132639	-3.51823	3.0044273249440695e-118	2.99861876544918e-115	560.947	585.701	582.178	55.1461	47.6459	48.6472	SNAP25
ENSG00000138316	-3.51055	0	0	2842.28	3078.37	3087.74	241.794	277.935	269.049	ADAMTS14
ENSG00000158270	-3.39858	5.46903405321119e-14	1.40924111550129e-12	70.5451	47.7828	68.4156	9.54452	6.17632	1.9856	COLEC12
ENSG00000107282	-3.34299	7.68235309780699e-26	4.79218784280285e-24	111.507	123.077	109.723	12.726	12.3526	8.9352	APBA1
ENSG00000120075	-3.28872	4.0439378959795095e-83	2.08764807726584e-80	400.514	417.737	437.602	48.7831	44.9989	34.748	HOXB5
ENSG00000182013	-3.27973	7.02475135291498e-6	5.48604864394837e-5	23.8943	20.9955	21.9446	1.0605	0	5.9568	PNMA8A
ENSG00000175928	-3.25686	3.6032899078574e-209	1.0788970642106598e-205	1342.63	1241.63	1423.82	125.139	150.879	140.978	LRRN1
ENSG00000170961	-3.25049	4.398286776491929e-164	8.230843916357589e-161	1008.11	987.511	938.455	118.776	108.527	81.4096	HAS2
ENSG00000165376	-3.21498	2.4425092183281302e-21	1.12513247715663e-19	77.372	114.389	131.668	9.54452	15.882	8.9352	CLDN2
ENSG00000151136	-3.17688	3.3508325768615802e-68	9.64717586696053e-66	360.69	321.448	348.532	33.9361	39.7049	39.712	BTBD11
ENSG00000205426	-2.97238	2.13197160947082e-21	9.912343778070679e-20	131.988	93.3936	96.8145	13.7865	12.3526	14.892	KRT81
ENSG00000101115	-2.94327	9.00261939540307e-7	8.36612135124639e-6	31.8591	23.1674	27.1081	2.121	5.29399	2.9784	SALL4
ENSG00000069431	-2.79499	4.94555755096028e-24	2.7321011843330697e-22	136.539	110.045	126.504	15.907529559539901	16.7643	20.8488	ABCC9
ENSG00000137880	-2.7949	1.7254539866631301e-37	1.9422384687468998e-35	196.844	193.303	234.937	29.6941	24.7053	35.7408	GCHFR
ENSG00000184792	-2.7637	7.178099370874909e-75	2.54128189719935e-72	449.44	437.285	418.239	63.6301	72.3512	55.5968	OSBP2
ENSG00000183778	-2.73298	2.7146270806409796e-35	2.7459920286673e-33	204.808	175.204	212.992	30.7546	24.7053	33.7552	B3GALT5
ENSG00000121440	-2.70622	1.12253144826307e-111	8.84495700628761e-109	682.694	669.683	682.865	109.232	97.9388	105.237	PDZRN3
ENSG00000111335	-2.69621	9.37364518649635e-5	5.6768949064335e-4	26.1699	13.0317	18.072	3.18151	3.52933	1.9856	OAS2
ENSG00000167083	-2.69008	3.90531545689742e-5	2.5870122878412e-4	25.0321	18.0995	19.3629	1.0605	4.41166	3.9712	GNGT2
ENSG00000171435	-2.6791	3.81630580933594e-5	2.5347788053047e-4	17.0674	23.8914	20.6538	3.18151	4.41166	1.9856	KSR2
ENSG00000267051	-2.6646	7.23416492888163e-6	5.6202741645193e-5	27.3078	36.1991	23.2355	10.605	3.52933	0	AP005229.1
ENSG00000124225	-2.65371	4.82468306733608e-276	2.40767767336962e-272	5174.82	4828.96	5724.96	896.124	759.688	844.873	PMEPA1
ENSG00000258717	-2.61574	1.11704211823419e-5	8.29525672226394e-5	27.3078	24.6154	24.5263	3.18151	7.94099	0.9928	AL132711.1
ENSG00000116574	-2.58274	5.00968360195266e-6	4.05186240976949e-5	27.3078	39.819	18.072	2.121	6.17632	5.9568	RHOU
ENSG00000203867	-2.53699	6.37841045272612e-20	2.66573475348012e-18	110.369	109.321	101.978	19.089	17.6466	18.863194688938002	RBM20
ENSG00000019549	-2.47043	1.67030767876898e-72	5.4361252736631494e-70	519.985	579.185	534.416	91.2032	119.997	82.4024	SNAI2
ENSG00000136842	-2.46533	3.6199932468615e-5	2.4226606570748e-4	19.343	27.5113	21.9446	4.24201	6.17632	1.9856	TMOD1
ENSG00000185338	-2.41458	8.31379212841438e-8	9.17212836805392e-7	30.7212	60.8144	36.1441	8.48402	7.94099	7.9424	SOCS1
ENSG00000158258	-2.35669	1.3978884798277398e-75	5.10433864182954e-73	9787.56	8324.34	11271.8	1937.54	1964.95	1832.71	CLSTN2
ENSG00000101096	-2.34116	4.74424961483884e-87	3.0880939558153195e-84	713.416	708.054	827.441	147.41	129.703	166.79	NFATC2
ENSG00000221890	-2.32935	1.94254467575171e-99	1.3848493495561399e-96	1313.05	1123.62	1466.42	267.246	285.876	220.402	NPTXR
ENSG00000083290	-2.32636	1.71873118454477e-7	1.80950243064836e-6	37.5482	49.9547	32.2715	6.36301	10.588	6.9496	ULK2
ENSG00000127863	-2.22672	2.00506314084765e-74	6.82222733673413e-72	571.188	553.122	614.449	131.502	127.056	112.186	TNFRSF19
ENSG00000121068	-2.22177	1.5423830583541499e-18	5.86066415396444e-17	163.847	173.756	100.687	33.9361	26.47	34.748	TBX2
ENSG00000196814	-2.22045	1.07960836089828e-22	5.4237640171168405e-21	143.366	161.448	178.139	32.8756	26.47	44.676	MVB12B
ENSG00000185070	-2.19928	1.86370051258344e-24	1.06494123564453e-22	242.356	186.063	184.593	46.6621	29.9993	57.5824	FLRT2
ENSG00000144730	-2.1866	2.8777253779428096e-219	1.0770606658295497e-215	9544.07	8637.82	10746.4	2109.34	2091.13	2150.4	IL17RD
ENSG00000154217	-2.1704	1.0538942981511e-21	5.02479348331851e-20	204.808	157.828	178.139	58.3276	31.764	30.7768	PITPNC1
ENSG00000278934	-2.16324	6.59685412531061e-6	5.17889371316335e-5	34.1347	26.7873	40.0167	9.54452	9.70565	2.9784	AC117489.1
ENSG00000188277	-2.15394	3.58897083413301e-6	2.98336937022794e-5	23.8943	35.4751	58.0887	5.30251	8.82332	11.9136	C15orf62
ENSG00000149596	-2.13041	1.35591718226676e-13	3.34974193658674e-12	76.2342	99.1855	92.9419	22.2705	16.7643	22.8344	JPH2
ENSG00000120068	-2.12778	4.32594118301352e-13	1.0135158912503199e-11	78.5098	87.6018	87.7785	19.089	23.823	14.892	HOXB8
ENSG00000275342	-2.09717	3.2803988574232897e-28	2.34980149734374e-26	224.151	248.326	271.081	48.7831	77.6452	45.6688	PRAG1
ENSG00000198205	-2.09616	5.74304743852566e-14	1.47730520965924e-12	86.4746	98.4615	143.285	26.5125	19.4113	30.7768	ZXDA
ENSG00000280109	-2.09037	5.5906792187592e-4	0.0027451	23.8943	13.7556	25.8172	3.18151	2.647	8.9352	PLAC4
ENSG00000197813	-2.05849	5.7520388971453e-4	0.00281142	12.5161	26.7873	20.6538	5.30251	5.29399	3.9712	AC011450.1
ENSG00000146966	-2.05325	1.7507454716479398e-156	2.9122678284490396e-153	1608.88	1619.55	1630.36	395.567	404.108	370.314	DENND2A
ENSG00000130176	-2.0469	1.0396766502389e-4	6.2344312975697e-4	20.4808	21.7194	34.8532	6.36301	7.05866	4.964	CNN1
ENSG00000027075	-2.02642	6.788566414592069e-28	4.72705245548176e-26	203.67	204.887	216.864	46.6621	56.4692	49.64	PRKCH
ENSG00000131477	-2.0257	5.2467317099012e-4	0.00260009	35.2725	14.4796	19.3629	8.48402	2.647	5.9568	RAMP2
ENSG00000155011	-2.0238	1.8456055408537496e-146	2.76305605521215e-143	2268.82	2028.6	2203.5	585.397	519.694	493.421	DKK2
ENSG00000132386	-2.01043	1.34496940784492e-16	4.3772906532274505e-15	147.917	106.425	171.684	30.7546	39.7049	33.7552	SERPINF1
ENSG00000177875	-1.98325	4.66178376854021e-5	3.0410267886194e-4	30.7212	26.7873	27.1081	5.30251	7.05866	8.9352	CCDC184
ENSG00000223749	-1.96847	7.3065025048045e-4	0.00345175	27.3078	30.4072	16.7812	0	7.05866	11.9136	MIR503HG
ENSG00000163485	-1.95119	2.2875294243985702e-17	7.96432628201651e-16	146.779	118.733	169.103	30.7546	41.4696	38.7192	ADORA1
ENSG00000260910	-1.9266	5.18741493225518e-6	4.18205648631084e-5	44.3751	44.1629	36.1441	4.24201	10.588	17.8704	LINC00565
ENSG00000187764	-1.92001	4.871156759034e-4	0.00244063	29.5834	24.6154	15.4903	4.24201	4.41166	9.928	SEMA4D
ENSG00000154237	-1.9187	1.22120911020483e-25	7.52375374027838e-24	211.635	199.819	205.247	58.3276	47.6459	57.5824	LRRK1
ENSG00000115594	-1.91711	1.8996739503684098e-25	1.15141776157755e-23	221.876	200.543	201.374	46.6621	58.2339	59.568	IL1R1
ENSG00000248690	-1.90163	8.30826639447995e-12	1.64093741677783e-10	91.0259	91.2217	82.615	28.6336	25.5876	16.8776	HAS2-AS1
ENSG00000260027	-1.88413	8.3686859945088e-21	3.69579935173426e-19	212.773	189.683	151.031	45.6016	54.7046	49.64	HOXB7
ENSG00000108932	-1.87499	5.54898372633732e-69	1.66147670733992e-66	1174.23	1002.71	1364.44	302.243	323.816	335.566	SLC16A6
ENSG00000227470	-1.87248	0.00116572	0.00521424	14.7917	24.6154	20.6538	7.42351	6.17632	2.9784	AC073415.1
ENSG00000238117	-1.86332	6.69888585173263e-23	3.422833450044e-21	209.36	264.977	211.701	62.5696	49.4106	78.4312	AP000844.2
ENSG00000141576	-1.85551	8.52456353585971e-13	1.9395325333640697e-11	84.199	109.321	108.432	29.6941	29.117	24.82	RNF157
ENSG00000267934	-1.84803	6.4912834571439e-4	0.00311079	17.0674	20.2715	29.6898	5.30251	6.17632	6.9496	AC010300.1
ENSG00000115461	-1.83856	7.94195115499418e-14	2.02209099900371e-12	144.504	116.561	141.995	55.1461	26.47	31.7696	IGFBP5
ENSG00000180884	-1.82652	1.48855712862428e-26	9.774205602032479e-25	227.565	250.498	298.189	62.5696	78.5275	76.4456	ZNF792
ENSG00000162804	-1.82238	3.58405709862969e-59	8.14107568567161e-57	1051.35	819.547	1124.34	285.275	283.229	275.006	SNED1
ENSG00000275632	-1.80654	8.4224713614738e-4	0.00391714	17.0674	25.3394	21.9446	6.36301	5.29399	6.9496	AL035461.2
ENSG00000196387	-1.79661	4.84432744443545e-15	1.35306765243737e-13	119.471	128.869	126.504	41.3596	37.9403	28.7912	ZNF140
ENSG00000228526	-1.79116	4.24753707183593e-6	3.47675656109654e-5	53.4777	55.7466	30.9806	18.0285	14.1173	8.9352	MIR34AHG
ENSG00000109705	-1.75768	4.106245882158e-9	5.50847733886984e-8	70.5451	75.2941	80.0333	26.5125	14.1173	26.8056	NKX3-2
ENSG00000101265	-1.72437	1.28114556331494e-6	1.16228477525686e-5	43.2373	51.4027	55.507	12.726	19.4113	12.9064	RASSF2
ENSG00000177374	-1.71923	1.4755916685345799e-16	4.76431256727836e-15	182.052	149.864	169.103	37.1176	62.6456	50.6328	HIC1
ENSG00000273449	-1.71911	5.7680977886938e-4	0.00281651	20.4808	40.543	24.5263	13.7865	8.82332	3.9712	AC093788.1
ENSG00000215817	-1.71636	0.00607268	0.0214471	11.3782	18.0995	18.072	5.30251	6.17632	2.9784	ZC3H11B
ENSG00000104419	-1.70085	6.98262630429735e-81	2.90380273337877e-78	1423.42	1383.53	1610.99	505.859	416.461	436.832	NDRG1
ENSG00000221866	-1.69037	0.00776265	0.0263346	19.343	13.0317	23.2355	12.726	1.76466	2.9784	PLXNA4
ENSG00000214796	-1.68446	0.00531687	0.0192221	14.7917	20.2715	14.1995	5.30251	6.17632	3.9712	AC098934.1
ENSG00000107719	-1.67232	1.7686678777779699e-40	2.32269533317666e-38	430.097	429.321	447.928	148.47	138.526	123.107	PALD1
ENSG00000203814	-1.66879	7.6885122452125e-4	0.00360943	23.8943	28.9593	20.6538	6.36301	7.05866	9.928	HIST2H2BF
ENSG00000009724	-1.66709	0.00242188	0.00980739	17.0674	28.2353	18.072	3.18151	7.94099	8.9352	MASP2
ENSG00000131738	-1.65987	2.21793211074539e-7	2.28524856365928e-6	60.3047	54.2986	64.543	21.21	20.2936	14.892	KRT33B
ENSG00000197385	-1.65738	3.2687231486116e-4	0.00170628	28.4456	33.3031	25.8172	8.48402	13.235	5.9568	ZNF860
ENSG00000263990	-1.65439	0.0137163	0.0424095	6.82694	15.9276	23.2355	2.121	4.41166	7.9424	AC004253.1
ENSG00000170689	-1.63765	2.6271698751392802e-52	5.10796885723508e-50	900.019	925.972	771.934	320.272	247.053	272.027	HOXB9
ENSG00000163823	-1.63708	3.29852322740598e-16	1.02984908388122e-14	204.808	147.692	185.884	67.8721	51.1753	53.6112	CCR1
ENSG00000130635	-1.63364	7.2913094327987e-4	0.00344674	25.0321	24.6154	25.8172	6.36301	7.94099	9.928	COL5A1
ENSG00000153292	-1.60841	1.61032300735222e-7	1.70255266547105e-6	55.7534	78.914	73.579	25.452	15.882	27.7984	ADGRF1
ENSG00000274461	-1.60733	5.960014610923e-4	0.00289699	25.0321	28.9593	30.9806	7.42351	14.1173	5.9568	AL391425.1
ENSG00000270604	-1.60248	0.00907306	0.0298994	25.0321	11.5837	14.1995	7.42351	6.17632	2.9784	HCG17
ENSG00000232774	-1.58709	8.002973664930319e-26	4.9714738065424e-24	314.039	265.701	320.133	91.2032	105.88	100.273	AL355916.1
ENSG00000279342	-1.58181	0.00966592	0.0315613	15.9295	12.3077	19.3629	6.36301	3.52933	5.9568	AP000866.6
ENSG00000270540	-1.56979	0.00957324	0.0313048	9.10259	25.3394	16.7812	7.42351	5.29399	4.964	AC093915.1
ENSG00000222345	-1.55979	0.014246	0.0437672	25.0321	15.2036	7.74516	4.24201	7.94099	3.9712	RF00569
ENSG00000237596	-1.55551	0.0130265	0.0406715	20.4808	13.0317	12.9086	5.30251	2.647	7.9424	AL138828.1
ENSG00000255837	-1.54501	6.8500340707148e-4	0.0032639	37.5482	30.4072	19.3629	9.54452	10.588	9.928	TAS2R20
ENSG00000147485	-1.53562	9.74146075283283e-9	1.23175176461706e-7	76.2342	114.389	80.0333	30.7546	29.9993	33.7552	PXDNL
ENSG00000197852	-1.53547	1.01134462987325e-6	9.30027054903714e-6	53.4777	66.6063	60.6704	25.452	16.7643	20.8488	FAM212B
ENSG00000281207	-1.53216	0.0147184	0.0449601	12.5161	19.5475	12.9086	7.42351	2.647	5.9568	SLFNL1-AS1
ENSG00000261040	-1.52877	5.94599469689694e-5	3.7687335566149e-4	39.8238	57.1945	33.5624	20.1495	14.1173	11.9136	WFDC21P
ENSG00000028137	-1.5165	2.1966301786588e-27	1.5016324385708198e-25	324.28	310.588	342.078	121.958	115.585	103.251	TNFRSF1B
ENSG00000139998	-1.50671	7.23957839749372e-15	1.99601709371784e-13	169.536	237.466	166.521	71.0536	63.5279	69.496	RAB15
ENSG00000142583	-1.50072	2.38193659428146e-8	2.84369798668164e-7	88.7503	79.638	90.3602	41.3596	25.5876	24.82	SLC2A5
ENSG00000204869	-1.4993	0.0165094	0.0494819	13.6539	12.3077	20.6538	3.18151	8.82332	3.9712	IGFL4
ENSG00000261468	-1.49695	2.8308329729871e-5	1.9440550659903e-4	43.2373	40.543	59.3796	13.7865	21.176	14.892	AC096921.2
ENSG00000182742	-1.4965	0.00203135	0.00844758	18.2052	31.8552	25.8172	6.36301	8.82332	11.9136	HOXB4
ENSG00000172889	-1.49521	8.04910629804402e-6	6.19235202405021e-5	48.9264	49.2307	56.7978	20.1495	14.1173	20.8488	EGFL7
ENSG00000235959	-1.49477	0.00204407	0.00848636	19.343	30.4072	25.8172	5.30251	10.588	10.9208	AC009237.6
ENSG00000237015	-1.49158	0.0150318	0.0456937	17.0674	15.9276	12.9086	5.30251	7.94099	2.9784	AL031186.1
ENSG00000263874	-1.48529	0.00902336	0.0297749	15.9295	19.5475	18.072	4.24201	9.70565	4.964	LINC00672
ENSG00000256377	-1.46699	0.00498468	0.0181527	17.0674	20.9955	27.1081	6.36301	5.29399	11.9136	AC009509.1
ENSG00000128011	-1.46146	0.00233233	0.00949615	23.8943	21.7194	27.1081	9.54452	9.70565	6.9496	LRFN1
ENSG00000250770	-1.46039	0.010662	0.034305	19.343	18.0995	20.6538	6.36301	12.3526	1.9856	AC005865.2
ENSG00000163806	-1.45751	0.00190086	0.00797585	23.8943	44.1629	21.9446	11.6655	6.17632	15.8848	SPDYA
ENSG00000143554	-1.45237	0.00339114	0.0130855	31.8591	26.0633	20.6538	16.968	4.41166	7.9424	SLC27A3
ENSG00000031081	-1.44753	0.00285815	0.0113132	37.5482	26.7873	15.4903	13.7865	7.94099	7.9424	ARHGAP31
ENSG00000132688	-1.42955	8.87022736666911e-6	6.75825189002777e-5	48.9264	52.1267	61.9613	21.21	21.176	17.8704	NES
ENSG00000057657	-1.42688	7.39829638564237e-6	5.73296358669382e-5	88.7503	56.4706	61.9613	15.907529559539901	23.823	36.7336	PRDM1
ENSG00000170989	-1.4268	1.13261685709816e-9	1.66565883768336e-8	131.988	98.4615	104.56	34.9966	44.9989	43.6832	S1PR1
ENSG00000273119	-1.42432	0.00100232	0.00455962	25.0321	28.2353	45.1801	16.968	9.70565	9.928	AP005229.2
ENSG00000104140	-1.41108	0.00175051	0.00740728	28.4456	23.8914	34.8532	12.726	6.17632	13.8992	RHOV
ENSG00000164002	-1.40663	2.25190930808501e-7	2.31706764614025e-6	71.6829	92.6696	74.8699	37.1176	26.47	27.7984	EXO5
ENSG00000182986	-1.40408	0.00251312	0.0101303	25.0321	21.7194	30.9806	7.42351	10.588	10.9208	ZNF320
ENSG00000168243	-1.39655	2.27450802725412e-16	7.229651735885651e-15	223.013	229.502	207.828	102.869	72.3512	77.4384	GNG4
ENSG00000272654	-1.39621	0.0135166	0.0418785	27.3078	13.7556	20.6538	2.121	7.94099	12.9064	AL358472.2
ENSG00000147481	-1.38809	0.005348	0.0193021	19.343	26.7873	19.3629	8.48402	7.94099	8.9352	SNTG1
ENSG00000065618	-1.38753	1.4230087116899e-4	8.2345948397125e-4	36.4104	45.6108	51.6344	11.6655	22.9406	15.8848	COL17A1
ENSG00000169439	-1.38529	2.2690834751777903e-61	5.56892601752241e-59	2064.01	1739	1977.6	765.682	784.393	658.226	SDC2
ENSG00000114251	-1.38048	4.804071037295619e-121	5.137267678525199e-118	11299.7	10003.3	10601.8	4251.55	4169.9	3829.23	WNT5A
ENSG00000223947	-1.37681	2.5920417926163e-4	0.00139789	38.686	35.4751	40.0167	15.907529559539901	14.9996	12.9064	AC016738.1
ENSG00000079308	-1.37348	9.083309472862498e-44	1.30755986652139e-41	879.538	846.334	1052.05	369.055	357.344	342.516	TNS1
ENSG00000260742	-1.37247	0.0157556	0.047508	13.6539	18.8235	18.072	7.42351	4.41166	7.9424	AC009962.1
ENSG00000235016	-1.36119	1.6011214020416e-4	9.1339921213014e-4	58.029	40.543	37.4349	18.0285	13.235	21.8416	SEMA3F-AS1
ENSG00000123570	-1.35872	1.351613017147e-4	7.8643600776169e-4	40.9617	65.8823	54.2161	32.8756	12.3526	18.863194688938002	RAB9B
ENSG00000135299	-1.3575	0.0108759	0.034836	15.9295	18.0995	25.8172	7.42351	10.588	4.964	ANKRD6
ENSG00000159958	-1.34815	0.00592158	0.0209976	13.6539	38.371	28.3989	7.42351	9.70565	14.892	TNFRSF13C
ENSG00000143375	-1.34788	0.0038795	0.0146852	30.7212	26.7873	19.3629	10.605	7.05866	12.9064	CGN
ENSG00000132623	-1.34606	1.44344626990267e-23	7.66306173996908e-22	438.062	413.393	414.366	205.737	139.408	154.877	ANKEF1
ENSG00000196632	-1.34413	1.6900752386714298e-20	7.312750404089569e-19	289.007	296.108	327.878	100.748	126.173	131.05	WNK3
ENSG00000244586	-1.34115	4.25662789666458e-16	1.31123407903221e-14	237.805	241.086	245.263	116.655	95.2919	74.46	WNT5A-AS1
ENSG00000261644	-1.3391	0.00353305	0.013552	47.7886	39.095	20.6538	6.36301	10.588	25.8128	AC007728.2
ENSG00000280106	-1.33127	1.88006287355409e-5	1.3295428096352e-4	64.856	47.0588	69.7064	25.452	19.4113	26.8056	AC008555.8
ENSG00000185955	-1.33	0.01626	0.0488225	10.2404	20.2715	25.8172	6.36301	7.05866	8.9352	C7orf61
ENSG00000120708	-1.30693	2.6261359175259797e-81	1.15634943592004e-78	15889.7	13815	16644.3	6225.15	6686.31	5812.84	TGFBI
ENSG00000267280	-1.30532	0.00909287	0.0299415	19.343	26.7873	20.6538	6.36301	7.05866	13.8992	TBX2-AS1
ENSG00000267397	-1.30431	0.0106547	0.0342889	21.6187	14.4796	29.6898	7.42351	10.588	7.9424	AC090229.1
ENSG00000165072	-1.30199	4.6038743234299405e-61	1.11168713703338e-58	2062.87	1843.98	1950.49	865.37	802.922	705.881	MAMDC2
ENSG00000230453	-1.30125	0.00351329	0.0134831	29.5834	23.1674	29.6898	9.54452	8.82332	14.892	ANKRD18B
ENSG00000248544	-1.29489	0.0076888	0.0261909	25.0321	20.9955	20.6538	8.48402	10.588	7.9424	AC008676.1
ENSG00000164796	-1.29472	1.81592137893934e-8	2.20846132933395e-7	126.298	141.176	105.851	36.0571	65.2926	50.6328	CSMD3
ENSG00000170214	-1.29115	3.54281270041004e-5	2.3775280766227e-4	72.8207	53.5746	54.2161	32.8756	19.4113	21.8416	ADRA1B
ENSG00000132965	-1.28506	0.00126975	0.00560254	27.3078	32.5792	50.3435	12.726	13.235	18.863194688938002	ALOX5AP
ENSG00000229373	-1.28219	0.00220798	0.00905137	37.5482	27.5113	29.6898	8.48402	13.235	16.8776	LINC00452
ENSG00000169744	-1.27975	5.6394268789202e-4	0.00276541	37.5482	38.371	40.0167	19.089	16.7643	11.9136	LDB2
ENSG00000253304	-1.27624	8.05574905656489e-8	8.90713582908663e-7	94.4394	114.389	92.9419	46.6621	44.9989	33.7552	TMEM200B
ENSG00000204682	-1.27345	9.84702867481838e-6	7.42295399248268e-5	58.029	82.5339	65.8339	26.5125	34.4109	24.82	CASC10
ENSG00000266053	-1.27242	0.0161573	0.0485432	20.4808	20.2715	20.6538	5.30251	5.29399	14.892	NDUFV2-AS1
ENSG00000095203	-1.27125	1.5273078526263899e-16	4.9172743788537105e-15	376.62	282.353	278.826	146.349	117.35	125.093	EPB41L4B
ENSG00000224186	-1.267	0.00750471	0.0256163	27.3078	24.6154	21.9446	5.30251	14.1173	10.9208	C5orf66
ENSG00000278266	-1.26412	2.52791824347188e-5	1.7496747121136e-4	64.856	67.3303	56.7978	22.2705	21.176	35.7408	AC079949.2
ENSG00000253930	-1.2625	0.00584752	0.0207991	35.2725	23.8914	20.6538	14.847	10.588	7.9424	TNFRSF10A-AS1
ENSG00000255152	-1.26052	2.0065773832474e-4	0.00111467	58.029	87.6018	40.0167	20.1495	36.1756	21.8416	MSH5-SAPCD1
ENSG00000185482	-1.25946	0.00956285	0.0312862	19.343	18.8235	32.2715	7.42351	11.4703	9.928	STAC3
ENSG00000279148	-1.25757	0.0119822	0.0379009	19.343	24.6154	18.072	7.42351	8.82332	9.928	AC126474.1
ENSG00000183873	-1.25425	3.0788913388803398e-80	1.2457860063345298e-77	6519.73	5784.61	6237.44	2810.33	2580.82	2379.74	SCN5A
ENSG00000236901	-1.25365	0.0043325	0.0161228	29.5834	23.1674	29.6898	13.7865	8.82332	11.9136	MIR600HG
ENSG00000172403	-1.25006	5.90999691823585e-10	9.08604652579133e-9	147.917	128.145	174.266	56.2066	72.3512	58.5752	SYNPO2
ENSG00000232977	-1.24758	0.0012766	0.00562778	43.2373	28.9593	37.4349	12.726	14.1173	18.863194688938002	LINC00327
ENSG00000261572	-1.24429	0.00196504	0.00820603	37.5482	43.4389	33.5624	9.54452	26.47	11.9136	AC097639.1
ENSG00000147145	-1.23484	0.005166	0.0187264	25.0321	31.1312	23.2355	10.605	10.588	12.9064	LPAR4
ENSG00000174844	-1.23372	0.0151581	0.0459903	26.1699	20.2715	15.4903	11.6655	7.94099	6.9496	DNAH12
ENSG00000053254	-1.22543	7.536658390630449e-25	4.40747315492689e-23	419.857	435.113	449.219	169.68	204.701	181.682	FOXN3
ENSG00000085117	-1.2254	2.16373945189903e-39	2.74519858765936e-37	1608.88	1464.61	1661.34	637.362	789.687	591.709	CD82
ENSG00000074047	-1.22524	1.1174125528474e-16	3.66859283523648e-15	279.905	293.212	371.768	121.958	133.232	146.934	GLI2
ENSG00000197472	-1.2226	0.00153272	0.00659189	37.5482	27.5113	60.6704	20.1495	14.1173	18.863194688938002	ZNF695
ENSG00000143494	-1.22143	1.18801693615154e-7	1.281397806277e-6	95.5772	137.556	114.887	61.5091	48.5283	40.7048	VASH2
ENSG00000135439	-1.21993	8.60930696706744e-5	5.2565226184325e-4	69.4073	47.0588	63.2521	24.3915	31.764	19.856	AGAP2
ENSG00000180855	-1.21921	4.13288348320848e-8	4.80383529713619e-7	112.645	123.801	112.305	45.6016	41.4696	63.5392	ZNF443
ENSG00000137825	-1.21383	1.65855791275692e-7	1.74861059942844e-6	104.68	113.665	143.285	45.6016	67.9396	40.7048	ITPKA
ENSG00000226806	-1.20414	6.4600648791308e-4	0.0030998	36.4104	50.6787	40.0167	21.21	15.882	18.863194688938002	AC011893.1
ENSG00000228727	-1.20362	0.00167193	0.00711496	42.0995	45.6108	28.3989	16.968	11.4703	22.8344	SAPCD1
ENSG00000164236	-1.1979	2.3323014757676e-12	4.9597848570620297e-11	210.497	206.335	241.391	104.99	74.1159	108.215	ANKRD33B
ENSG00000261286	-1.19723	0.0131146	0.040887	23.8943	41.9909	18.072	11.6655	19.4113	5.9568	ATP2C2-AS1
ENSG00000084710	-1.18793	0.0151628	0.0459903	17.0674	34.0271	18.072	8.48402	10.588	11.9136	EFR3B
ENSG00000159433	-1.18209	1.19579599488959e-14	3.23145520568449e-13	269.664	325.792	318.842	106.05	134.997	161.826	STARD9
ENSG00000253414	-1.17943	6.55688538592849e-5	4.1245013072577e-4	60.3047	60.8144	73.579	21.21	25.5876	38.7192	AC124067.2
ENSG00000213139	-1.17402	0.0044428	0.0164637	34.1347	24.6154	32.2715	14.847	13.235	11.9136	CRYGS
ENSG00000006016	-1.17321	9.7286211456658e-4	0.00444046	44.3751	47.0588	37.4349	14.847	15.882	26.8056	CRLF1
ENSG00000135519	-1.16942	0.00274384	0.0109367	32.9969	31.8552	33.5624	13.7865	15.882	13.8992	KCNH3
ENSG00000169047	-1.1691	5.9625809469910894e-77	2.23164498393509e-74	2738.74	2841.63	3070.96	1294.87	1270.56	1279.72	IRS1
ENSG00000176887	-1.16765	1.3264465732061e-36	1.4286497588106899e-34	764.618	713.846	737.081	319.211	330.874	334.574	SOX11
ENSG00000125845	-1.16726	1.53641303254667e-32	1.36104375800333e-30	1104.83	1015.75	875.203	480.407	452.636	403.077	BMP2
ENSG00000170122	-1.16504	0.0159006	0.0478971	17.0674	22.4434	25.8172	8.48402	10.588	9.928	FOXD4
ENSG00000167925	-1.16156	0.0090854	0.0299268	25.0321	23.1674	33.5624	16.968	11.4703	7.9424	GHDC
ENSG00000180758	-1.1614	7.985949967289401e-10	1.19917409187853e-8	144.504	176.651	207.828	91.2032	76.7629	68.5032	GPR157
ENSG00000278709	-1.15883	1.78254966309091e-5	1.2677696439968e-4	95.5772	102.081	156.194	51.9646	30.8816	75.4528	NKILA
ENSG00000074276	-1.1571	0.0121006	0.0381878	23.8943	18.8235	34.8532	10.605	8.82332	14.892	CDHR2
ENSG00000168298	-1.15655	0.00606504	0.0214251	31.8591	27.5113	28.3989	18.0285	9.70565	11.9136	HIST1H1E
ENSG00000167889	-1.14405	3.5860287915902397e-35	3.60311657979177e-33	766.893	764.524	830.023	340.421	379.403	345.494	MGAT5B
ENSG00000143772	-1.14235	3.8019702301554895e-36	3.980370371724319e-34	892.054	851.402	999.126	394.507	424.402	418.961	ITPKB
ENSG00000063127	-1.14193	2.0863825043705e-4	0.00115344	47.7886	60.0905	83.9059	21.21	28.2346	36.7336	SLC6A16
ENSG00000126752	-1.1327	7.70851680072388e-13	1.7645902908813e-11	232.116	201.991	232.355	106.05	103.233	93.3232	SSX1
ENSG00000112139	-1.13211	6.2247674868879795e-25	3.69805531929365e-23	558.671	590.045	671.247	246.036	299.993	280.962	MDGA1
ENSG00000263503	-1.1233	0.00147133	0.00636811	56.8912	47.0588	42.5984	14.847	16.7643	35.7408	MAPK8IP1P2
ENSG00000204767	-1.12082	1.78825444098343e-59	4.1831183181192197e-57	1537.2	1559.46	1604.54	719.02	718.218	723.751	FAM196B
ENSG00000251405	-1.11663	0.0146479	0.0447814	23.8943	24.6154	24.5263	7.42351	14.9996	10.9208	AC008676.2
ENSG00000250312	-1.11277	3.07145609234592e-13	7.31045614602715e-12	260.562	279.457	251.718	137.865	98.8212	132.042	ZNF718
ENSG00000272578	-1.11043	0.00404265	0.0152028	38.686	33.3031	30.9806	12.726	14.1173	20.8488	AP000347.1
ENSG00000120093	-1.10007	2.08381593068221e-7	2.15596463705897e-6	116.058	160	112.305	62.5696	58.2339	62.5464	HOXB3
ENSG00000113209	-1.09755	1.0398353450024e-4	6.2344312975697e-4	60.3047	57.9185	85.1968	29.6941	34.4109	29.784	PCDHB5
ENSG00000155961	-1.0952	0.00118947	0.00530303	37.5482	59.3665	42.5984	24.3915	22.9406	18.863194688938002	RAB39B
ENSG00000116774	-1.09479	8.37350748196203e-7	7.82520477605827e-6	126.298	107.149	99.3962	47.7226	61.7632	45.6688	OLFML3
ENSG00000136895	-1.09364	0.0109334	0.0349825	26.1699	35.4751	25.8172	19.089	7.94099	14.892	GARNL3
ENSG00000136859	-1.09127	1.48085822420178e-8	1.82618850696251e-7	178.638	163.62	247.845	90.1427	109.409	74.46	ANGPTL2
ENSG00000253598	-1.08804	0.0100483	0.0326177	27.3078	32.5792	32.2715	18.0285	7.05866	18.863194688938002	SLC10A5
ENSG00000181722	-1.0795	1.48039671948947e-11	2.83052609035464e-10	284.456	291.765	347.241	106.05	149.996	178.704	ZBTB20
ENSG00000169255	-1.07483	1.9904852221240902e-9	2.79808021224598e-8	186.603	165.068	154.903	69.9931	86.4685	83.3952	B3GALNT1
ENSG00000280239	-1.07402	0.00411275	0.0154123	39.8238	51.4027	34.8532	9.54452	25.5876	24.82	AC011498.7
ENSG00000173848	-1.06648	2.30058715268503e-85	1.3776836105138999e-82	8723.69	7766.87	8442.22	3921.74	3974.91	4000.98	NET1
ENSG00000249743	-1.06627	0.0143566	0.0440076	25.0321	19.5475	49.0527	13.7865	14.9996	14.892	AC116345.1
ENSG00000170145	-1.06316	1.37874566430366e-64	3.6859288107661003e-62	2998.17	3067.51	3363.98	1460.31	1514.08	1533.88	SIK2
ENSG00000270804	-1.05985	0.0060304	0.021333	30.7212	38.371	34.8532	10.605	21.176	17.8704	AC010326.4
ENSG00000130649	-1.04879	1.3597852226922e-4	7.9026958730303e-4	63.7181	75.2941	60.6704	34.9966	34.4109	27.7984	CYP2E1
ENSG00000020181	-1.04602	6.0614050960563e-5	3.8321493113622e-4	72.8207	76.742	78.7425	39.2386	43.2343	27.7984	ADGRA2
ENSG00000251361	-1.03945	5.89431315660848e-5	3.7470812003221e-4	109.231	84.7058	76.1607	43.4806	56.4692	30.7768	AC012625.1
ENSG00000153404	-1.03933	0.00525746	0.0190395	36.4104	29.6832	49.0527	13.7865	19.4113	21.8416	PLEKHG4B
ENSG00000279348	-1.03835	3.4351353807492302e-15	9.777074483877711e-14	369.793	333.755	425.984	164.378	183.525	198.56	AC012513.3
ENSG00000084453	-1.03272	2.15739051330834e-10	3.6127844938187e-9	245.77	280.181	234.937	158.015	104.998	112.186	SLCO1A2
ENSG00000280303	-1.03026	0.00688803	0.0238429	44.3751	39.819	28.3989	12.726	15.882	26.8056	ERICD
ENSG00000186166	-1.02717	3.2501093452549e-13	7.71115483483537e-12	415.306	451.764	401.457	151.652	245.288	224.373	CCDC84
ENSG00000091622	-1.02598	2.68017770073959e-7	2.72587910039215e-6	188.879	131.041	141.995	62.5696	81.1745	81.4096	PITPNM3
ENSG00000276966	-1.02373	0.00705696	0.0242985	43.2373	36.9231	41.3075	12.726	14.1173	32.7624	HIST1H4E
ENSG00000196466	-1.02357	3.36854736113282e-6	2.80793555364807e-5	124.023	123.801	108.432	77.4166	45.8813	53.6112	ZNF799
ENSG00000007372	-1.02348	1.75096636959136e-56	3.69207289002144e-54	2621.55	2516.56	2830.86	1274.72	1344.67	1293.62	PAX6
ENSG00000246985	-1.02183	0.00186388	0.00784683	39.8238	55.0226	47.7618	24.3915	28.2346	17.8704	SOCS2-AS1
ENSG00000103196	-1.02169	3.414565331516e-4	0.00177313	69.4073	50.6787	73.579	32.8756	33.5286	27.7984	CRISPLD2
ENSG00000248923	-1.0194	0.0147752	0.0451152	39.8238	34.0271	29.6898	6.36301	17.6466	26.8056	MTND5P11
ENSG00000150471	-1.01413	2.2361947936383497e-16	7.122994096927601e-15	492.678	456.832	598.959	278.912	262.053	222.387	ADGRL3
ENSG00000273373	-1.01395	2.08613870960527e-5	1.4621527444522e-4	89.8881	97.7375	100.687	33.9361	58.2339	49.64	AL355488.1
ENSG00000116128	-1.01207	6.99757054178457e-29	5.21197157119686e-27	820.371	764.524	871.331	393.446	397.049	423.925	BCL9
ENSG00000236393	-1.01025	0.0152018	0.0460901	42.0995	23.1674	25.8172	13.7865	13.235	17.8704	AC091806.1
ENSG00000271895	-1.01001	0.00251846	0.0101463	47.7886	46.3348	36.1441	20.1495	22.9406	21.8416	AL109811.3
ENSG00000050327	-1.00574	5.15312069216883e-6	4.15912831412022e-5	105.818	103.529	100.687	55.1461	56.4692	42.6904	ARHGEF5
ENSG00000223403	-1.00442	6.8404599441802e-4	0.00326142	50.0642	83.2579	73.579	24.3915	45.8813	32.7624	MEG9
ENSG00000139800	-1.00311	0.00307117	0.0120394	42.0995	57.9185	34.8532	25.452	20.2936	22.8344	ZIC5

## Sheet: DEGs_high_in_PFOS
ID	log2FoldChange	pvalue	padj	RPE1-24w-PFOA-a	RPE1-24w-PFOA-b	RPE1-24w-PFOA-c	RPE1-24w-PFOS-a	RPE1-24w-PFOS-b	RPE1-24w-PFOS-c	Gene.name
ENSG00000126016	5.84499	5.2646279339132496e-27	3.5343831748258003e-25	2.27565	1.44796	5.16344	145.289	142.938	169.769	AMOT
ENSG00000112541	5.31461	2.64200324557821e-6	2.26019603368865e-5	0	1.44796	0	34.9966	20.2936	21.8416	PDE10A
ENSG00000078596	4.70631	9.29800613743792e-32	7.8644321968126e-30	1.13782	5.06787	11.6177	162.257	147.349	132.042	ITM2A
ENSG00000154553	4.60775	1.49799394690615e-6	1.3412958958811e-5	3.41347	0	0	32.8756	26.47	14.892	PDLIM3
ENSG00000120594	3.88423	1.0231944645559597e-170	2.1883206184096e-167	65.9938	50.6787	73.579	956.573	856.744	917.347	PLXDC2
ENSG00000261115	3.40798	6.47689947685719e-6	5.10077128185318e-5	1.13782	2.17194	2.58172	16.968	23.823	21.8416	TMEM178B
ENSG00000077420	3.26405	9.65800343514271e-8	1.05771740619987e-6	1.13782	4.34389	3.87258	34.9966	22.0583	36.7336	APBB1IP
ENSG00000152580	3.17133	6.95488342970368e-8	7.77026565866372e-7	2.27565	1.44796	9.03602	25.452	33.5286	43.6832	IGSF10
ENSG00000138772	3.13634	1.1019842311733e-7	1.1963601105798e-6	6.82694	3.61991	0	27.5731	34.4109	32.7624	ANXA3
ENSG00000051523	3.12346	8.51159357047876e-45	1.2871420943801799e-42	31.8591	32.5792	23.2355	218.463	315.875	241.25	CYBA
ENSG00000168878	3.09432	1.40779299801747e-6	1.26507016646576e-5	5.68912	2.17194	1.29086	25.452	26.47	24.82	SFTPB
ENSG00000181804	3.08573	3.10113866505899e-7	3.13062353031679e-6	3.41347	2.17194	5.16344	31.8151	28.2346	25.8128	SLC9A9
ENSG00000146477	3.00806	6.80542599966677e-5	4.2647146354546e-4	1.13782	3.61991	1.29086	21.21	17.6466	14.892	SLC22A3
ENSG00000189221	2.92194	4.46596249956384e-27	3.0253359538900598e-25	11.3782	26.7873	16.7812	141.047	140.291	156.862	MAOA
ENSG00000198515	2.90725	1.95947450171413e-8	2.37532734940585e-7	4.5513	6.51583	2.58172	34.9966	37.9403	35.7408	CNGA1
ENSG00000213214	2.90638	7.54986708458588e-9	9.76071330944173e-8	2.27565	5.06787	9.03602	34.9966	48.5283	35.7408	ARHGEF35
ENSG00000233251	2.88765	2.2683980469445e-4	0.00124169	2.27565	18.0995	3.87258	72.1141	55.5869	60.5608	AC007743.1
ENSG00000179914	2.82633	5.84384167597465e-5	3.7181535797287e-4	3.41347	1.44796	3.87258	19.089	14.1173	24.82	ITLN1
ENSG00000173376	2.7941	1.8280045046865602e-14	4.90449022216173e-13	7.96477	11.5837	10.3269	73.1746	74.9982	62.5464	NDNF
ENSG00000249550	2.73142	4.8039486510048e-9	6.39288135592826e-8	42.0995	13.0317	18.072	148.47	161.467	169.769	LINC01234
ENSG00000170373	2.70911	1.8000270424624802e-9	2.54949903999109e-8	9.10259	8.68778	3.87258	56.2066	58.2339	31.7696	CST1
ENSG00000147082	2.70764	3.4164478761015e-8	3.99279009782323e-7	5.68912	6.51583	6.4543	44.5411	24.7053	53.6112	CCNB3
ENSG00000226965	2.68935	6.96295669997011e-7	6.59762181995269e-6	1.13782	8.68778	3.87258	32.8756	34.4109	29.784	AC092167.1
ENSG00000044524	2.64002	1.94462701685689e-26	1.25487116678295e-24	29.5834	17.3756	29.6898	151.652	164.996	142.963	EPHA3
ENSG00000174482	2.61585	7.7058613963195e-6	5.9404969600566e-5	4.5513	3.61991	5.16344	33.9361	29.9993	15.8848	LINGO2
ENSG00000176978	2.60032	2.0153636137632201e-47	3.39011333276956e-45	48.9264	56.4706	54.2161	291.638	384.697	294.862	DPP7
ENSG00000055732	2.5791	9.90832190588647e-6	7.45789277290228e-5	7.96477	4.34389	1.29086	16.968	35.2933	29.784	MCOLN3
ENSG00000130433	2.47568	3.6606962345242e-4	0.0018846	2.27565	2.17194	5.16344	20.1495	16.7643	13.8992	CACNG6
ENSG00000055813	2.44468	8.14159063666517e-7	7.62274880684892e-6	10.2404	5.06787	5.16344	22.2705	45.8813	40.7048	CCDC85A
ENSG00000143226	2.43292	1.94072352836667e-8	2.35450339896089e-7	7.96477	12.3077	5.16344	34.9966	44.9989	64.532	FCGR2A
ENSG00000128052	2.41562	0.00102265	0.00464788	2.27565	5.79185	0	13.7865	22.0583	12.9064	KDR
ENSG00000155307	2.3375	2.76451248952951e-6	2.35156343640604e-5	5.68912	2.89593	14.1995	41.3596	28.2346	36.7336	SAMSN1
ENSG00000183508	2.33733	7.65941290546879e-6	5.91687670834744e-5	7.96477	3.61991	6.4543	23.331	29.117	34.748	FAM46C
ENSG00000150625	2.32805	6.75994714281983e-25	3.96875171275121e-23	29.5834	36.9231	25.8172	165.438	151.761	157.855	GPM6A
ENSG00000258168	2.31788	1.82326608163271e-7	1.90748543033705e-6	9.10259	7.9638	6.4543	31.8151	43.2343	42.6904	AC025569.1
ENSG00000172572	2.29363	2.6864071836996e-4	0.00143893	6.82694	2.89593	2.58172	21.21	22.9406	14.892	PDE3A
ENSG00000184867	2.27922	9.89614865942801e-129	1.13965570446382e-125	261.699	264.977	247.845	1366.99	1162.03	1243.98	ARMCX2
ENSG00000154864	2.25919	8.15628900875662e-42	1.12025507110179e-39	61.4425	53.5746	77.4516	293.759	300.875	307.768	PIEZO2
ENSG00000120262	2.23029	8.78375328089253e-12	1.73028382063476e-10	10.2404	20.9955	14.1995	79.5376	69.7042	72.4744	CCDC170
ENSG00000104833	2.2292	8.43768480092436e-9	1.08151180783081e-7	9.10259	10.8597	14.1995	61.5091	58.2339	38.7192	TUBB4A
ENSG00000227372	2.20049	6.51032929937035e-20	2.7073927761353697e-18	25.0321	31.1312	27.1081	124.079	133.232	130.057	TP73-AS1
ENSG00000101160	2.19159	1.4395874499432e-70	4.39838034961216e-68	130.85	133.937	154.903	611.91	707.63	584.759	CTSZ
ENSG00000154645	2.18168	5.4591439012412e-4	0.00268845	4.5513	5.06787	2.58172	22.2705	22.9406	11.9136	CHODL
ENSG00000196482	2.17367	0.00131206	0.00576607	1.13782	3.61991	6.4543	12.726	15.882	20.8488	ESRRG
ENSG00000183549	2.15375	8.785361258176779e-11	1.5347216265596802e-9	17.0674	10.8597	19.3629	64.6906	71.4689	66.5176	ACSM5
ENSG00000155629	2.15172	2.38402261242298e-13	5.74737560878977e-12	28.4456	26.0633	14.1995	127.26	74.9982	110.201	PIK3AP1
ENSG00000235903	2.14493	7.8882299716699e-4	0.00369623	4.5513	7.23981	1.29086	11.6655	17.6466	32.7624	CPB2-AS1
ENSG00000150394	2.12497	2.7993257548458e-9	3.85190311358424e-8	17.0674	14.4796	9.03602	67.8721	46.7636	65.5248	CDH8
ENSG00000011201	2.11969	2.0445231088298497e-133	2.78259595111742e-130	343.623	290.317	339.496	1403.04	1377.32	1414.74	ANOS1
ENSG00000168772	2.1034	5.10366410282811e-13	1.1846039578827898e-11	27.3078	23.1674	11.6177	82.7192	95.2919	94.316	CXXC4
ENSG00000069535	2.09433	2.1691433568383e-14	5.75784489277059e-13	21.6187	19.5475	28.3989	90.1427	104.115	96.3016	MAOB
ENSG00000165379	2.08287	3.18475323726067e-7	3.20422988676274e-6	15.9295	10.8597	5.16344	51.9646	37.0579	48.6472	LRFN5
ENSG00000153294	2.05388	1.9527708999005702e-21	9.107455807604829e-20	40.9617	34.7511	37.4349	142.107	165.878	157.855	ADGRF4
ENSG00000136160	2.04956	1.0847991345372e-4	6.4780725341673e-4	3.41347	5.79185	10.3269	31.8151	28.2346	18.863194688938002	EDNRB
ENSG00000152208	2.04237	0.00211064	0.00872883	2.27565	5.79185	3.87258	9.54452	16.7643	24.82	GRID2
ENSG00000112293	2.03607	2.29638152620203e-10	3.8199030920856204e-9	25.0321	17.3756	10.3269	63.6301	75.8805	78.4312	GPLD1
ENSG00000115380	2.01175	6.1234122125636395e-291	4.583680211714509e-287	3551.15	3247.78	3464.67	13935	14375.8	13036.5	EFEMP1
ENSG00000185436	2.0036	2.08777496499094e-5	1.4626148339204e-4	7.96477	7.9638	9.03602	36.0571	21.176	42.6904	IFNLR1
ENSG00000257137	1.97087	0.00193885	0.00811704	3.41347	5.06787	3.87258	18.0285	17.6466	13.8992	C12orf80
ENSG00000144908	1.96443	1.75038366038578e-50	3.27562422245444e-48	116.058	109.321	132.959	497.375	452.636	435.839	ALDH1L1
ENSG00000187689	1.92169	4.02747251591919e-18	1.49616106788651e-16	34.1347	47.7828	41.3075	143.168	187.937	140.978	AMTN
ENSG00000160326	1.92132	7.3194010694662e-4	0.00345674	10.2404	4.34389	2.58172	24.3915	20.2936	19.856	SLC2A6
ENSG00000263004	1.91419	0.00445428	0.016494	2.27565	5.79185	3.87258	12.726	22.9406	10.9208	AC007114.1
ENSG00000256683	1.89722	2.97220290220943e-6	2.50263496338456e-5	7.96477	18.0995	9.03602	59.3881	39.7049	38.7192	ZNF350
ENSG00000143061	1.89288	1.43491349232324e-45	2.2146484426362094e-43	127.436	103.529	131.668	460.258	415.578	453.709	IGSF3
ENSG00000183715	1.89266	0.00156045	0.00669577	3.41347	3.61991	9.03602	15.907529559539901	22.9406	17.8704	OPCML
ENSG00000158856	1.88774	9.72823469477088e-5	5.867904980476e-4	3.41347	8.68778	15.4903	46.6621	30.8816	22.8344	DMTN
ENSG00000124212	1.87924	4.8230535200521704e-24	2.674293861063e-22	61.4425	52.8506	74.8699	264.065	204.701	216.43	PTGIS
ENSG00000184378	1.87112	8.07667025552314e-5	4.9780086618129e-4	11.3782	8.68778	3.87258	30.7546	31.764	26.8056	ACTRT3
ENSG00000140297	1.85882	5.2191204544976e-4	0.00258812	3.41347	10.8597	6.4543	18.0285	22.0583	38.7192	GCNT3
ENSG00000178445	1.84312	6.12068845601771e-38	6.99487228053749e-36	91.0259	97.7375	103.269	346.784	370.579	328.617	GLDC
ENSG00000104870	1.82668	1.24352951893403e-17	4.43259057808605e-16	35.2725	49.2307	45.1801	149.531	173.819	140.978	FCGRT
ENSG00000138759	1.8117	1.09298391173246e-5	8.14893532995348e-5	7.96477	10.8597	14.1995	43.4806	38.8226	32.7624	FRAS1
ENSG00000136960	1.80766	7.92751130448836e-5	4.8991857484364e-4	17.0674	2.89593	15.4903	39.2386	33.5286	43.6832	ENPP2
ENSG00000103888	1.79716	2.61297176532392e-82	1.3039600099554801e-79	742.999	730.497	800.333	2952.44	2766.99	2171.25	CEMIP
ENSG00000267761	1.79194	3.40232198940116e-6	2.83451099072481e-5	17.0674	7.23981	18.072	45.6016	50.2929	43.6832	MIR4527HG
ENSG00000132470	1.79011	8.1314967534354e-4	0.00379597	9.10259	5.79185	5.16344	26.5125	26.47	15.8848	ITGB4
ENSG00000109511	1.77536	1.7190202131401299e-28	1.25538788345955e-26	93.3015	81.0859	65.8339	279.973	262.053	284.934	ANXA10
ENSG00000138109	1.77313	9.45813485886206e-5	5.7211206857383e-4	11.3782	9.41176	6.4543	32.8756	24.7053	36.7336	CYP2C9
ENSG00000151789	1.76068	1.1932639535905198e-30	9.76194243125887e-29	78.5098	82.5339	99.3962	289.517	287.64	298.833	ZNF385D
ENSG00000172264	1.75577	1.2096816454759799e-30	9.84246951870701e-29	105.818	123.801	148.449	445.411	343.227	484.486	MACROD2
ENSG00000104998	1.75185	0.00104565	0.00474089	14.7917	4.34389	3.87258	27.5731	29.117	18.863194688938002	IL27RA
ENSG00000171295	1.74731	3.8395228252265e-6	3.16702458492925e-5	10.2404	21.7194	14.1995	68.9326	35.2933	56.5896	ZNF440
ENSG00000124613	1.73592	0.00615275	0.0217094	7.96477	5.06787	1.29086	14.847	14.1173	19.856	ZNF391
ENSG00000142556	1.72926	1.56792399243986e-10	2.6644029615002504e-9	25.0321	23.8914	36.1441	83.7797	106.762	85.3808	ZNF614
ENSG00000164509	1.728	7.41227435400243e-28	5.13746108119307e-26	85.3368	82.5339	70.9973	271.489	258.523	266.07	IL31RA
ENSG00000175161	1.72139	7.2146846657529e-4	0.00341483	11.3782	5.06787	6.4543	21.21	27.3523	24.82	CADM2
ENSG00000181523	1.71915	2.77118410624519e-9	3.82372324927159e-8	35.2725	19.5475	23.2355	81.6587	98.8212	71.4816	SGSH
ENSG00000128274	1.71609	1.20153828750494e-5	8.8524752471636e-5	15.9295	10.1357	14.1995	42.4201	53.8222	32.7624	A4GALT
ENSG00000130224	1.712	3.97927713165178e-46	6.27092188820619e-44	186.603	167.964	154.903	571.611	502.047	598.658	LRCH2
ENSG00000139737	1.71011	5.58439949848147e-6	4.47080453966664e-5	19.343	12.3077	10.3269	38.1781	46.7636	51.6256	SLAIN1
ENSG00000123405	1.703	0.00779037	0.0264107	5.68912	4.34389	3.87258	11.6655	19.4113	13.8992	NFE2
ENSG00000119514	1.69685	6.95980754028576e-41	9.22082112262107e-39	117.196	149.864	151.031	452.834	455.283	452.717	GALNT12
ENSG00000147614	1.69616	1.5221853847009401e-21	7.143773477855119e-20	67.1316	66.6063	67.1247	247.097	193.231	211.466	ATP6V0D2
ENSG00000114115	1.6951	1.47550690768425e-7	1.56791861077455e-6	10.2404	22.4434	29.6898	62.5696	65.2926	73.4672	RBP1
ENSG00000126562	1.69347	1.94616808075719e-7	2.02053275568765e-6	13.6539	20.9955	27.1081	62.5696	82.9392	52.6184	WNK4
ENSG00000106560	1.67757	1.13053504305034e-6	1.03265650576612e-5	14.7917	21.7194	15.4903	68.9326	42.3519	59.568	GIMAP2
ENSG00000172159	1.66625	2.95685598211448e-5	2.0222517546019e-4	12.5161	13.0317	11.6177	41.3596	29.9993	47.6544	FRMD3
ENSG00000122223	1.66486	8.95106068365218e-6	6.81619173422975e-5	14.7917	14.4796	11.6177	43.4806	49.4106	37.7264	CD244
ENSG00000146021	1.65979	5.96548823534896e-11	1.0619420258193701e-9	26.1699	40.543	38.7258	111.353	134.997	89.352	KLHL3
ENSG00000148288	1.64615	0.0116739	0.0370549	6.82694	4.34389	3.87258	22.2705	17.6466	6.9496	GBGT1
ENSG00000163288	1.62555	5.78120334150487e-5	3.6844005339702e-4	21.6187	7.23981	18.072	49.8436	31.764	57.5824	GABRB1
ENSG00000203434	1.61311	1.9204536627247e-4	0.00107481	17.0674	13.7556	3.87258	32.8756	31.764	44.676	AL353740.1
ENSG00000029559	1.60789	1.20473190792002e-20	5.227838085063959e-19	70.5451	62.9864	78.7425	208.919	208.23	222.387	IBSP
ENSG00000163093	1.60691	7.55252114307827e-6	5.84334852883849e-5	17.0674	16.6516	11.6177	49.8436	48.5283	41.6976	BBS5
ENSG00000179930	1.60267	1.61344383352169e-5	1.155897395698e-4	15.9295	13.0317	14.1995	50.9041	39.7049	39.712	ZNF648
ENSG00000008516	1.60105	2.41123870226514e-7	2.46912822240844e-6	36.4104	22.4434	40.0167	110.292	127.938	54.604	MMP25
ENSG00000248334	1.59757	1.6884792227501e-5	1.2055965441698e-4	14.7917	23.8914	9.03602	61.5091	40.5873	49.64	WHAMMP2
ENSG00000164128	1.59547	2.62629842340864e-7	2.67653599025533e-6	22.7565	26.0633	14.1995	69.9931	66.1749	59.568	NPY1R
ENSG00000203930	1.59303	0.00539943	0.0194548	9.10259	5.79185	5.16344	11.6655	17.6466	30.7768	LINC00632
ENSG00000106688	1.58844	0.0143254	0.0439478	4.5513	4.34389	6.4543	7.42351	15.882	21.8416	SLC1A1
ENSG00000157111	1.57917	1.87257845008896e-9	2.64225937570988e-8	67.1316	24.6154	50.3435	139.986	157.055	115.165	TMEM171
ENSG00000076706	1.57564	2.77579359619238e-10	4.54665272741752e-9	36.4104	31.8552	37.4349	127.26	95.2919	90.3448	MCAM
ENSG00000184669	1.56153	1.67579547420786e-5	1.1975338445998e-4	9.10259	17.3756	21.9446	53.0251	43.2343	46.6616	OR7E14P
ENSG00000257322	1.54704	0.0132522	0.0412471	7.96477	1.44796	10.3269	13.7865	14.1173	25.8128	AC138123.1
ENSG00000177839	1.53978	3.9572867440144e-4	0.00201581	5.68912	13.0317	14.1995	31.8151	29.117	35.7408	PCDHB9
ENSG00000083067	1.53701	1.0556966414939e-4	6.3194060055203e-4	17.0674	17.3756	6.4543	33.9361	47.6459	40.7048	TRPM3
ENSG00000137261	1.53302	3.87763202600426e-12	7.985148426590069e-11	36.4104	41.9909	58.0887	133.623	120.879	136.014	KIAA0319
ENSG00000141449	1.53223	4.61993246432244e-14	1.19870032796137e-12	58.029	49.9547	52.9253	173.922	133.232	156.862	GREB1L
ENSG00000139364	1.53113	8.46570825813831e-35	8.33816567977557e-33	168.398	160.724	218.155	503.738	498.518	561.925	TMEM132B
ENSG00000138741	1.52946	4.36691937703901e-10	6.874568874200951e-9	38.686	40.543	27.1081	91.2032	110.291	110.201	TRPC3
ENSG00000188488	1.52529	1.01181049160452e-5	7.5979625039114e-5	19.343	13.7556	24.5263	62.5696	40.5873	58.5752	SERPINA5
ENSG00000173227	1.52389	9.77804201678226e-7	9.00843489435368e-6	28.4456	15.2036	29.6898	63.6301	60.8809	79.424	SYT12
ENSG00000153283	1.52282	7.04026281451279e-17	2.3579367918584104e-15	73.9585	55.7466	76.1607	183.467	192.348	205.51	CD96
ENSG00000114315	1.52276	1.60571899339111e-18	6.085878240521099e-17	67.1316	67.3303	81.3242	198.314	200.289	216.43	HES1
ENSG00000133454	1.50283	5.2352984978097e-4	0.00259529	6.82694	12.3077	15.4903	41.3596	29.9993	26.8056	MYO18B
ENSG00000105997	1.50023	0.00107698	0.00486528	7.96477	12.3077	9.03602	21.21	33.5286	29.784	HOXA3
ENSG00000102409	1.49883	3.08058461005067e-5	2.0963378271394e-4	18.2052	17.3756	11.6177	42.4201	42.3519	50.6328	BEX4
ENSG00000153956	1.49231	1.7926321619473197e-114	1.4909720053618501e-111	6392.29	5219.18	6224.53	16589.4	17116.4	16420.9	CACNA2D1
ENSG00000005249	1.48834	6.07226759602368e-63	1.5948757575451e-60	367.517	343.167	354.987	1060.5	952.919	971.951	PRKAR2B
ENSG00000114279	1.48563	0.00144445	0.00626443	11.3782	10.8597	7.74516	39.2386	19.4113	26.8056	FGF12
ENSG00000224958	1.48108	5.95063077398991e-5	3.7700758915532e-4	17.0674	27.5113	7.74516	57.2671	44.1166	52.6184	PGM5-AS1
ENSG00000138798	1.46958	4.4666893127935805e-9	5.97060765194935e-8	48.9264	43.4389	24.5263	90.1427	120.879	117.15	EGF
ENSG00000260918	1.46152	5.1484759058692e-4	0.00255902	17.0674	7.9638	15.4903	25.452	44.1166	37.7264	AC107398.3
ENSG00000259065	1.4612	0.00215014	0.0088555	5.68912	12.3077	9.03602	25.452	27.3523	23.8272	AC005520.2
ENSG00000005108	1.45936	2.058529520108e-4	0.00113977	28.4456	7.9638	15.4903	46.6621	51.1753	39.712	THSD7A
ENSG00000152578	1.44827	7.4193960114501606e-9	9.60032650712362e-8	32.9969	31.8552	50.3435	113.474	109.409	85.3808	GRIA4
ENSG00000169860	1.44137	0.00985918	0.0321293	4.5513	6.51583	10.3269	21.21	12.3526	23.8272	P2RY1
ENSG00000137801	1.44004	1.3212725814008099e-114	1.1635748127147901e-111	21805.3	18229.1	21813	54348.6	57708	55698	THBS1
ENSG00000001561	1.44004	1.0416765754078e-32	9.33828743139528e-31	185.465	189.683	172.975	558.885	476.459	458.673	ENPP4
ENSG00000125538	1.43741	1.4264159731128698e-104	1.06774367667364e-101	4822.1	5471.13	4954.32	15048.5	13630.3	12649.3	IL1B
ENSG00000174607	1.43106	1.20166028501022e-81	5.80324391189936e-79	725.932	683.439	673.829	2022.38	1800.84	1794.98	UGT8
ENSG00000120738	1.42421	5.36956319723704e-86	3.34948877607649e-83	648.56	676.923	708.682	1827.24	1900.54	1725.49	EGR1
ENSG00000178568	1.4149	4.77777334081892e-10	7.47419484695926e-9	56.8912	47.0588	37.4349	148.47	104.998	126.086	ERBB4
ENSG00000179546	1.40728	3.72790643975312e-19	1.4648421866022e-17	144.504	92.6696	105.851	311.788	305.287	282.948	HTR1D
ENSG00000104368	1.40716	1.2457943511540598e-95	8.477630559603399e-93	49165.4	46530.3	42965	130436	128934	108388	PLAT
ENSG00000110090	1.4059	4.37529561687471e-19	1.71024936501909e-17	81.9233	96.2895	103.269	230.129	254.994	260.114	CPT1A
ENSG00000248362	1.40429	0.00174442	0.00738566	17.0674	5.79185	12.9086	33.9361	29.117	27.7984	AC011352.1
ENSG00000156218	1.40201	1.8838743699537601e-47	3.2049412718838396e-45	360.69	287.421	318.842	836.736	862.038	839.909	ADAMTSL3
ENSG00000166689	1.40166	3.7578804574802497e-28	2.67901087280652e-26	150.193	170.86	207.828	428.443	498.518	461.652	PLEKHA7
ENSG00000163531	1.39831	2.2204438509617499e-57	4.81771954967367e-55	387.998	353.303	383.385	1001.11	1013.8	937.203	NFASC
ENSG00000153930	1.39101	5.35886074003535e-6	4.30477242824963e-5	14.7917	25.3394	38.7258	69.9931	69.7042	64.532	ANKFN1
ENSG00000114698	1.39052	2.4175562451460902e-24	1.37095585401826e-22	120.609	134.661	118.759	341.482	313.228	333.581	PLSCR4
ENSG00000132793	1.38871	0.00320544	0.0124873	14.7917	13.0317	3.87258	38.1781	23.823	23.8272	LPIN3
ENSG00000236453	1.38755	6.70690843461519e-39	8.16334359143284e-37	246.908	243.258	250.427	713.718	607.044	616.529	AC003092.1
ENSG00000162711	1.38661	1.26857613023869e-5	9.3234429287204e-5	29.5834	24.6154	12.9086	63.6301	57.3516	57.5824	NLRP3
ENSG00000164342	1.38337	2.8402122908662e-18	1.06568466683102e-16	124.023	95.5656	90.3602	300.122	254.994	252.171	TLR3
ENSG00000081189	1.38114	2.93971812949214e-21	1.34588746534027e-19	118.334	108.597	136.831	281.033	314.993	341.523	MEF2C
ENSG00000224786	1.37592	6.8933945353699e-4	0.00328143	13.6539	11.5837	15.4903	44.5411	28.2346	31.7696	CETN4P
ENSG00000167332	1.36592	2.13387507552247e-7	2.20623230356677e-6	53.4777	33.3031	33.5624	99.6872	78.5275	130.057	OR51E2
ENSG00000187398	1.36543	5.68298850821695e-65	1.54690947193665e-62	818.095	655.927	689.319	1883.45	1790.25	1884.33	LUZP2
ENSG00000091831	1.36406	0.00442217	0.0164035	9.10259	13.7556	6.4543	34.9966	24.7053	18.863194688938002	ESR1
ENSG00000112294	1.36328	2.31201867647138e-24	1.3160924564811002e-22	136.539	127.421	162.648	352.087	352.05	382.228	ALDH5A1
ENSG00000276107	1.35752	3.5249642209579e-4	0.00182201	13.6539	18.8235	11.6177	39.2386	35.2933	41.6976	AC037198.1
ENSG00000174808	1.35217	1.57842986498617e-5	1.1355441378523e-4	20.4808	28.2353	18.072	61.5091	52.0576	61.5536	BTC
ENSG00000123610	1.35142	2.15211972894525e-7	2.2220265146234e-6	70.5451	35.4751	28.3989	118.776	102.351	120.129	TNFAIP6
ENSG00000100350	1.34809	1.71596997593151e-28	1.25538788345955e-26	155.882	203.439	178.139	468.742	450.872	461.652	FOXRED2
ENSG00000143850	1.34653	7.19659263071953e-10	1.08828473004548e-8	55.7534	41.9909	74.8699	126.2	141.173	160.834	PLEKHA6
ENSG00000152078	1.34551	4.37535947301987e-6	3.56772912149131e-5	56.8912	20.9955	29.6898	94.3847	93.5272	79.424	TMEM56
ENSG00000135525	1.34444	5.80979432006671e-10	8.957613879064751e-9	55.7534	49.9547	40.0167	133.623	111.174	128.071	MAP7
ENSG00000114631	1.34219	1.01098415823483e-36	1.09677129224157e-34	302.661	319.276	272.371	801.739	810.863	666.169	PODXL2
ENSG00000184371	1.33617	9.78310122092831e-69	2.8718197721278e-66	903.432	912.941	1080.45	2545.2	2476.71	2269.54	CSF1
ENSG00000106123	1.33176	1.3285561701529999e-28	9.79793813958645e-27	192.292	178.823	188.466	474.044	507.341	421.94	EPHB6
ENSG00000162426	1.33112	0.00277878	0.0110494	14.7917	14.4796	9.03602	46.6621	33.5286	17.8704	SLC45A1
ENSG00000198203	1.32912	1.1201998936416e-4	6.6602512341974e-4	23.8943	21.7194	14.1995	37.1176	60.8809	53.6112	SULT1C2
ENSG00000232859	1.32909	0.00137101	0.00599805	12.5161	13.0317	11.6177	37.1176	28.2346	28.7912	LYRM9
ENSG00000110628	1.32373	1.48858394365243e-6	1.33366787674569e-5	27.3078	39.819	40.0167	102.869	104.998	61.5536	SLC22A18
ENSG00000105825	1.32189	1.88174764749961e-81	8.53686182748989e-79	1661.22	1442.9	1471.58	3890.98	4005.79	3528.41	TFPI2
ENSG00000092068	1.32148	2.11027994731457e-13	5.13707334817016e-12	87.6124	65.8823	112.305	229.068	211.76	209.481	SLC7A8
ENSG00000229981	1.31495	0.00879444	0.0291609	7.96477	9.41176	9.03602	27.5731	14.9996	23.8272	LINC01435
ENSG00000135549	1.313	1.7784981011515198e-23	9.408443488459129e-22	161.571	145.52	172.975	440.108	358.227	387.192	PKIB
ENSG00000011465	1.31106	0.00259876	0.0104334	26.1699	6.51583	11.6177	38.1781	34.4109	33.7552	DCN
ENSG00000179388	1.30698	9.65451985104501e-13	2.16698375847069e-11	68.2694	61.5384	76.1607	164.378	173.819	165.798	EGR3
ENSG00000151090	1.30673	4.11953570699931e-31	3.40737950660148e-29	230.978	296.108	268.499	669.177	594.692	717.794	THRB
ENSG00000138061	1.30182	6.45729083950752e-16	1.94903429754571e-14	996.734	809.411	1199.21	2425.37	2492.59	2477.04	CYP1B1
ENSG00000136244	1.29981	1.7146894170538e-4	9.7053697489785e-4	19.343	16.6516	28.3989	68.9326	46.7636	39.712	IL6
ENSG00000163827	1.29349	2.81046056524211e-8	3.32611898199523e-7	52.3399	47.0588	37.4349	132.563	92.6449	113.179	LRRC2
ENSG00000074966	1.29334	1.70762348264349e-5	1.2179528898835e-4	20.4808	28.9593	24.5263	68.9326	54.7046	60.5608	TXK
ENSG00000166741	1.29192	7.04909558405243e-37	7.759706616827129e-35	245.77	265.701	273.662	615.091	676.749	629.435	NNMT
ENSG00000141448	1.28793	4.14598394954426e-65	1.14943566127087e-62	603.047	565.43	549.906	1346.84	1416.14	1431.62	GATA6
ENSG00000154358	1.28745	0.0133438	0.0414804	5.68912	7.9638	11.6177	14.847	22.0583	23.8272	OBSCN
ENSG00000270131	1.28022	8.08596333787529e-5	4.9816854786556e-4	14.7917	24.6154	38.7258	65.7511	48.5283	73.4672	AP003465.2
ENSG00000253537	1.27945	0.00539173	0.0194318	14.7917	7.9638	11.6177	37.1176	23.823	20.8488	PCDHGA7
ENSG00000133687	1.27824	3.45391083261759e-39	4.27342967562958e-37	319.728	281.629	276.244	690.387	721.748	712.83	TMTC1
ENSG00000111052	1.27785	0.0102012	0.0330925	12.5161	6.51583	9.03602	27.5731	21.176	17.8704	LIN7A
ENSG00000174600	1.26976	6.135060678383121e-14	1.57005116950553e-12	100.128	74.5701	83.9059	199.374	203.819	214.445	CMKLR1
ENSG00000179542	1.26835	2.8392365135836198e-11	5.271828169905661e-10	56.8912	67.3303	63.2521	154.833	154.408	144.949	SLITRK4
ENSG00000124772	1.26067	2.6724806036712e-4	0.00143199	14.7917	21.7194	21.9446	58.3276	43.2343	39.712	CPNE5
ENSG00000163431	1.25467	2.96702427230888e-16	9.35143586962869e-15	129.712	111.493	175.557	354.208	299.993	325.638	LMOD1
ENSG00000134363	1.25281	1.36477137465769e-81	6.384997578125111e-79	2655.68	2365.97	2188.01	5558.09	5923.09	5702.64	FST
ENSG00000156140	1.24837	7.38093468096916e-17	2.46102389997303e-15	117.196	103.529	114.887	272.549	239.994	280.962	ADAMTS3
ENSG00000132122	1.24834	7.04769154673652e-13	1.6182667200336298e-11	79.6477	90.4977	95.5236	240.734	176.466	215.438	SPATA6
ENSG00000112394	1.24795	0.00553435	0.0198359	12.5161	11.5837	9.03602	26.5125	31.764	20.8488	SLC16A10
ENSG00000250159	1.2421	3.1971963772216e-4	0.00167323	13.6539	23.1674	23.2355	57.2671	38.8226	47.6544	AC106791.1
ENSG00000228956	1.23505	0.00938162	0.0307874	12.5161	10.8597	6.4543	22.2705	20.2936	28.7912	SATB1-AS1
ENSG00000080224	1.23008	7.9027534559386e-4	0.00370188	14.7917	15.2036	20.6538	37.1176	43.2343	36.7336	EPHA6
ENSG00000174473	1.22684	8.525602532267e-4	0.00395896	25.0321	12.3077	16.7812	40.2991	37.9403	45.6688	GALNTL6
ENSG00000260896	1.22014	0.00110212	0.00496533	14.7917	20.2715	15.4903	32.8756	35.2933	51.6256	LINC02170
ENSG00000127329	1.21672	1.9338529359869e-7	2.0105355767125e-6	40.9617	40.543	47.7618	89.0822	97.9388	111.194	PTPRB
ENSG00000141753	1.21102	2.20337409909818e-17	7.68921063813493e-16	157.02	149.14	212.992	345.724	441.166	400.098	IGFBP4
ENSG00000173926	1.20844	2.04956689648402e-7	2.1219962660624e-6	63.7181	49.2307	36.1441	127.26	123.526	95.3088	MARCH3
ENSG00000170873	1.20572	4.99180230044462e-27	3.3663185693674e-25	208.222	199.819	207.828	465.56	458.813	493.421	MTSS1
ENSG00000206538	1.204	7.32011354012989e-80	2.88393210024433e-77	2215.34	2040.18	2024.07	4957.85	4447.84	5060.3	VGLL3
ENSG00000172671	1.19946	1.74382304249035e-7	1.83076961915309e-6	52.3399	36.1991	55.507	110.292	111.174	102.258	ZFAND4
ENSG00000106853	1.19862	2.32531069235253e-28	1.68175006643526e-26	246.908	229.502	220.737	568.429	520.576	512.285	PTGR1
ENSG00000158555	1.19778	0.00185253	0.00780148	14.7917	17.3756	18.072	34.9966	52.0576	27.7984	GDPD5
ENSG00000163536	1.19606	1.83892835690632e-5	1.3022987905035e-4	31.8591	26.7873	28.3989	65.7511	67.9396	64.532	SERPINI1
ENSG00000273783	1.19568	0.0135026	0.0418438	9.10259	13.0317	6.4543	20.1495	24.7053	22.8344	AL136040.1
ENSG00000244588	1.19194	0.0033634	0.0129966	22.7565	8.68778	16.7812	28.6336	37.9403	39.712	RAD21L1
ENSG00000106868	1.18666	7.29841153301019e-17	2.43894015760481e-15	145.641	139.004	161.358	394.507	307.052	309.754	SUSD1
ENSG00000175426	1.18325	0.0130468	0.0407053	7.96477	10.1357	12.9086	18.0285	22.0583	29.784	PCSK1
ENSG00000111885	1.1795	7.97052152585183e-21	3.53037508176117e-19	274.216	231.674	179.43	557.824	491.459	510.299	MAN1A1
ENSG00000185761	1.17881	0.00576321	0.0205333	19.343	9.41176	11.6177	33.9361	30.8816	24.82	ADAMTSL5
ENSG00000100342	1.17115	1.4327716643477799e-18	5.4580215233971e-17	157.02	153.484	188.466	345.724	414.696	353.437	APOL1
ENSG00000183775	1.17105	1.83414074818208e-6	1.61523065535494e-5	42.0995	39.819	37.4349	104.99	79.4099	85.3808	KCTD16
ENSG00000183248	1.17071	0.00771311	0.0262379	6.82694	15.2036	14.1995	27.5731	25.5876	29.784	PRR36
ENSG00000171408	1.17035	2.1931424740672397e-11	4.1196406498445103e-10	71.6829	91.9456	77.4516	178.164	191.466	178.704	PDE7B
ENSG00000139865	1.15685	0.00656956	0.0229314	17.0674	18.0995	10.3269	18.0285	44.9989	39.712	TTC6
ENSG00000172318	1.15673	2.15278094384844e-10	3.6091022967922604e-9	76.2342	94.1176	69.7064	189.83	194.995	157.855	B3GALT1
ENSG00000231738	1.15364	1.53997428949319e-5	1.1110821729157e-4	46.6508	34.0271	25.8172	86.9612	70.5866	80.4168	TSPAN19
ENSG00000162591	1.15263	9.12579659212875e-34	8.70205737457067e-32	995.596	1012.85	1183.72	2441.28	2671.7	1969.7146454133201	MEGF6
ENSG00000163293	1.15045	2.56274912917457e-35	2.60999436822262e-33	377.757	357.647	360.15	818.708	751.747	860.757	NIPAL1
ENSG00000225362	1.15036	0.0021862	0.00897193	31.8591	17.3756	10.3269	37.1176	40.5873	54.604	CT62
ENSG00000279080	1.14919	0.00590998	0.0209714	19.343	15.9276	11.6177	42.4201	43.2343	18.863194688938002	AL022322.2
ENSG00000120129	1.1489	6.91078445917197e-58	1.5214905020332898e-55	862.47	841.99	752.571	1827.24	1876.72	1756.26	DUSP1
ENSG00000151224	1.14776	1.12720663431323e-10	1.94193446746874e-9	93.3015	70.2262	76.1607	183.467	172.937	170.762	MAT1A
ENSG00000168899	1.14705	9.23329797649641e-22	4.4447493249558796e-20	261.699	202.715	201.374	461.318	512.635	494.414	VAMP5
ENSG00000232759	1.13502	1.36815247684501e-6	1.2331493516464e-5	38.686	41.9909	52.9253	108.171	89.9979	93.3232	AC002480.2
ENSG00000090238	1.13033	7.84502409372317e-14	2.00081525906524e-12	118.334	143.348	123.923	293.759	314.993	241.25	YPEL3
ENSG00000105497	1.12958	4.20977937935035e-77	1.61601556636549e-74	1072.97	1095.38	1064.96	2330.98	2362.88	2386.69	ZNF175
ENSG00000182985	1.12912	1.13452282695871e-83	6.06605044371385e-81	4123.47	3677.83	4002.96	8992	8663.62	8137.98	CADM1
ENSG00000116016	1.11968	2.9791779278870898e-36	3.1409347012955997e-34	435.787	405.43	450.51	1000.05	879.685	918.34	EPAS1
ENSG00000249306	1.11914	4.5078119996576597e-13	1.0511908636584899e-11	117.196	112.217	153.612	255.581	257.641	309.754	LINC01411
ENSG00000152137	1.11465	1.68538375828403e-10	2.8478420141388503e-9	71.6829	83.9818	86.4876	167.559	173.819	183.668	HSPB8
ENSG00000118855	1.11464	1.93432608111576e-28	1.40576678448466e-26	275.353	272.217	312.388	621.454	632.632	598.658	MFSD1
ENSG00000118523	1.11067	2.44509154718259e-71	7.626138656848039e-69	21542.4	19269.5	18176.6	42941.8	44515.4	39926.4	CTGF
ENSG00000005379	1.11059	0.0080677	0.0271725	13.6539	13.7556	12.9086	31.8151	33.5286	21.8416	TSPOAP1
ENSG00000167637	1.10815	0.0165742	0.0496166	15.9295	15.2036	10.3269	15.907529559539901	24.7053	49.64	ZNF283
ENSG00000272674	1.1044	2.73001835211374e-6	2.32751165999401e-5	39.8238	42.7149	56.7978	112.413	97.0565	87.3664	PCDHB16
ENSG00000196104	1.10398	1.4842957691655602e-9	2.15115120621274e-8	118.334	73.8461	83.9059	205.737	204.701	176.718	SPOCK3
ENSG00000264107	1.10186	0.00895804	0.0295977	13.6539	10.1357	16.7812	29.6941	25.5876	29.784	AC138207.2
ENSG00000197565	1.10011	6.5811955902558e-4	0.00314783	17.0674	28.9593	50.3435	50.9041	67.9396	84.388	COL4A6
ENSG00000125122	1.09811	0.0106772	0.034341	11.3782	18.8235	9.03602	32.8756	23.823	30.7768	LRRC29
ENSG00000175175	1.09368	7.49536435528307e-15	2.05895595895308e-13	151.331	151.312	118.759	323.45310104397697	283.229	300.818	PPM1E
ENSG00000170745	1.09294	2.0121968966918e-15	5.81555979543879e-14	137.677	160.724	140.704	345.724	291.17	307.768	KCNS3
ENSG00000215861	1.08878	2.94419031317144e-12	6.16468156342513e-11	96.715	133.937	108.432	249.218	236.465	245.222	AC245297.1
ENSG00000197635	1.08846	0.00183462	0.00773693	17.0674	22.4434	20.6538	46.6621	49.4106	32.7624	DPP4
ENSG00000148677	1.08526	3.8712337640502904e-85	2.22908618006142e-82	16555.3	16612.5	14737.7	33041	33130.7	35499.539604860904	ANKRD1
ENSG00000198673	1.08294	2.5830056481663e-4	0.00139352	31.8591	28.9593	24.5263	72.1141	48.5283	61.5536	FAM19A2
ENSG00000168672	1.07758	2.1961198774862698e-23	1.15361791880165e-21	260.562	257.737	236.227	573.732	499.4	525.191	FAM84B
ENSG00000242611	1.07629	9.0901718542038e-4	0.00418478	18.2052	26.7873	23.2355	50.9041	52.0576	42.6904	AC093627.6
ENSG00000224810	1.07533	0.0108893	0.0348714	17.0674	9.41176	15.4903	32.8756	25.5876	27.7984	AL355482.1
ENSG00000211448	1.06549	5.45537172654352e-9	7.21359133092014e-8	73.9585	78.914	69.7064	150.591	168.525	148.92	DIO2
ENSG00000134602	1.06507	6.924609849052719e-11	1.22250393927085e-9	95.5772	107.873	98.1054	239.673	192.348	203.524	STK26
ENSG00000117525	1.05757	5.631035030834239e-62	1.42885127875626e-59	16800	16263.5	14185.3	33764.3	34046.5	30553.4	F3
ENSG00000185442	1.05081	0.0153913	0.0465689	25.0321	9.41176	10.3269	36.0571	27.3523	27.7984	FAM174B
ENSG00000272482	1.04712	1.41450325968426e-7	1.50722621357531e-6	84.199	56.4706	98.1054	163.317	170.29	148.92	AC254633.1
ENSG00000145088	1.03871	0.0112363	0.0358447	14.7917	18.0995	10.3269	29.6941	35.2933	25.8128	EAF2
ENSG00000036672	1.03332	4.8700095668979e-4	0.00244063	28.4456	24.6154	32.2715	53.0251	52.9399	66.5176	USP2
ENSG00000111341	1.0304	0.00141256	0.00615468	29.5834	16.6516	38.7258	56.2066	62.6456	48.6472	MGP
ENSG00000109321	1.02719	1.12813291772074e-5	8.37346450728667e-5	46.6508	52.8506	41.3075	90.1427	112.056	87.3664	AREG
ENSG00000136040	1.02705	8.67211737914419e-6	6.62399333077386e-5	39.8238	62.9864	51.6344	118.776	109.409	91.3376	PLXNC1
ENSG00000154188	1.02534	4.2115706178207595e-25	2.5120089131232897e-23	484.713	453.212	619.613	1021.26	1093.21	1032.51	ANGPT1
ENSG00000073756	1.02505	1.03999333014998e-41	1.41543092233413e-39	1017.21	834.751	922.965	1886.63	1923.48	1816.82	PTGS2
ENSG00000163661	1.02304	5.92210418113836e-12	1.18846945972952e-10	8531.4	7662.62	6256.8	16350.8	15625.2	13653	PTX3
ENSG00000158769	1.02134	9.019143698815458e-25	5.25391440914266e-23	369.793	335.927	330.46	756.138	706.748	639.363	F11R
ENSG00000047648	1.02086	1.8635247342578e-4	0.0010462	43.2373	33.3031	28.3989	69.9931	82.0569	60.5608	ARHGAP6
ENSG00000151320	1.01365	3.3432744056972e-4	0.00174094	40.9617	26.0633	40.0167	69.9931	84.7039	56.5896	AKAP6
ENSG00000148680	1.01308	9.061219474534649e-12	1.78259548953033e-10	104.68	133.213	134.249	242.855	251.465	259.121	HTR7
ENSG00000146038	1.01097	7.25612915229975e-8	8.08871999546385e-7	75.0964	75.2941	69.7064	129.381	158.82	155.87	DCDC2
ENSG00000101384	1.00952	6.6884335436452284e-43	9.44646590395404e-41	853.368	769.592	777.098	1567.42	1699.37	1556.71	JAG1
ENSG00000185250	1.00867	2.8136162228076e-4	0.00149265	28.4456	34.7511	34.8532	55.1461	67.0572	75.4528	PPIL6
ENSG00000254087	1.00237	9.7484002401281e-22	4.66272523945552e-20	256.01	264.253	304.643	553.582	539.105	552.989	LYN
ENSG00000106484	1.00123	4.41675517727624e-81	1.8892354788286399e-78	3644.45	3365.07	3704.77	7072.49	7171.59	7172.98	MEST
ENSG00000106366	1.0006	1.4488246761892e-17	5.12774331612966e-16	113905	107685	97088.2	229935	223330	184360	SERPINE1
ENSG00000170044	1.00036	6.251776591484629e-11	1.1102650931330502e-9	135.401	141.176	154.903	349.966	255.876	257.135	ZPLD1

## Sheet: GO_high_in_PFOA
source	term_name	term_id	highlighted	adjusted_p_value	negative_log10_of_adjusted_p_value	term_size	query_size	intersection_size	effective_domain_size	intersections
GO:MF	DNA-binding transcription factor activity, RNA polymerase II-specific	GO:0000981	TRUE	0.0159172	1.7981340487849389	1360	190	29	20246	ENSG00000120075,ENSG00000101115,ENSG00000019549,ENSG00000101096,ENSG00000121068,ENSG00000149596,ENSG00000120068,ENSG00000260027,ENSG00000180884,ENSG00000196387,ENSG00000109705,ENSG00000177374,ENSG00000197385,ENSG00000170689,ENSG00000182742,ENSG00000057657,ENSG00000182986,ENSG00000053254,ENSG00000074047,ENSG00000197472,ENSG00000180855,ENSG00000176887,ENSG00000170122,ENSG00000250312,ENSG00000120093…
GO:MF	DNA-binding transcription repressor activity, RNA polymerase II-specific	GO:0001227	FALSE	0.029153164729334168	1.5353142933961046	270	190	11	20246	ENSG00000019549,ENSG00000101096,ENSG00000121068,ENSG00000149596,ENSG00000120068,ENSG00000196387,ENSG00000109705,ENSG00000177374,ENSG00000057657,ENSG00000181722,ENSG00000007372
GO:MF	DNA-binding transcription repressor activity	GO:0001217	FALSE	0.0404123	1.393486167371571	280	190	11	20246	ENSG00000019549,ENSG00000101096,ENSG00000121068,ENSG00000149596,ENSG00000120068,ENSG00000196387,ENSG00000109705,ENSG00000177374,ENSG00000057657,ENSG00000181722,ENSG00000007372
GO:MF	DNA-binding transcription factor activity	GO:0003700	FALSE	0.0489418	1.3103201260334918	1448	190	29	20246	ENSG00000120075,ENSG00000101115,ENSG00000019549,ENSG00000101096,ENSG00000121068,ENSG00000149596,ENSG00000120068,ENSG00000260027,ENSG00000180884,ENSG00000196387,ENSG00000109705,ENSG00000177374,ENSG00000197385,ENSG00000170689,ENSG00000182742,ENSG00000057657,ENSG00000182986,ENSG00000053254,ENSG00000074047,ENSG00000197472,ENSG00000180855,ENSG00000176887,ENSG00000170122,ENSG00000250312,ENSG00000120093…
GO:BP	anatomical structure development	GO:0048856	TRUE	3.3734864584637656e-9	8.471921028809788	5997	187	99	21026	ENSG00000086696,ENSG00000133083,ENSG00000143631,ENSG00000075340,ENSG00000180875,ENSG00000053108,ENSG00000162490,ENSG00000168646,ENSG00000144476,ENSG00000103489,ENSG00000183638,ENSG00000167693,ENSG00000132639,ENSG00000107282,ENSG00000120075,ENSG00000175928,ENSG00000170961,ENSG00000205426,ENSG00000101115,ENSG00000069431,ENSG00000184792,ENSG00000111335,ENSG00000116574,ENSG00000203867,ENSG00000019549…
GO:BP	multicellular organism development	GO:0007275	FALSE	4.355333850922543e-8	7.360978549254177	4727	187	83	21026	ENSG00000086696,ENSG00000133083,ENSG00000075340,ENSG00000180875,ENSG00000053108,ENSG00000162490,ENSG00000168646,ENSG00000144476,ENSG00000103489,ENSG00000183638,ENSG00000167693,ENSG00000132639,ENSG00000107282,ENSG00000120075,ENSG00000175928,ENSG00000170961,ENSG00000101115,ENSG00000069431,ENSG00000111335,ENSG00000203867,ENSG00000019549,ENSG00000136842,ENSG00000185338,ENSG00000158258,ENSG00000101096…
GO:BP	system development	GO:0048731	FALSE	6.498498343552477e-8	7.187186987426827	4053	187	75	21026	ENSG00000133083,ENSG00000075340,ENSG00000053108,ENSG00000162490,ENSG00000168646,ENSG00000144476,ENSG00000103489,ENSG00000183638,ENSG00000167693,ENSG00000132639,ENSG00000107282,ENSG00000120075,ENSG00000175928,ENSG00000170961,ENSG00000101115,ENSG00000069431,ENSG00000203867,ENSG00000019549,ENSG00000136842,ENSG00000158258,ENSG00000101096,ENSG00000083290,ENSG00000121068,ENSG00000185070,ENSG00000149596…
GO:BP	developmental process	GO:0032502	FALSE	3.527828156464104e-7	6.452492577881777	6553	187	100	21026	ENSG00000086696,ENSG00000133083,ENSG00000143631,ENSG00000075340,ENSG00000180875,ENSG00000053108,ENSG00000162490,ENSG00000168646,ENSG00000144476,ENSG00000103489,ENSG00000183638,ENSG00000167693,ENSG00000132639,ENSG00000107282,ENSG00000120075,ENSG00000175928,ENSG00000170961,ENSG00000205426,ENSG00000101115,ENSG00000069431,ENSG00000184792,ENSG00000111335,ENSG00000116574,ENSG00000203867,ENSG00000019549…
GO:BP	multicellular organismal process	GO:0032501	FALSE	1.44285E-06	5.84078	7322	187	106	21026	ENSG00000086696,ENSG00000133083,ENSG00000075340,ENSG00000180875,ENSG00000053108,ENSG00000162490,ENSG00000168646,ENSG00000119686,ENSG00000144476,ENSG00000103489,ENSG00000183638,ENSG00000167693,ENSG00000132639,ENSG00000107282,ENSG00000120075,ENSG00000175928,ENSG00000170961,ENSG00000165376,ENSG00000151136,ENSG00000205426,ENSG00000101115,ENSG00000069431,ENSG00000111335,ENSG00000171435,ENSG00000203867…
GO:BP	anatomical structure morphogenesis	GO:0009653	FALSE	3.71408E-06	5.430148781307285	2713	187	55	21026	ENSG00000133083,ENSG00000180875,ENSG00000053108,ENSG00000162490,ENSG00000168646,ENSG00000144476,ENSG00000132639,ENSG00000120075,ENSG00000170961,ENSG00000101115,ENSG00000069431,ENSG00000116574,ENSG00000203867,ENSG00000019549,ENSG00000136842,ENSG00000101096,ENSG00000083290,ENSG00000121068,ENSG00000185070,ENSG00000188277,ENSG00000120068,ENSG00000275342,ENSG00000131477,ENSG00000132386,ENSG00000187764…
GO:BP	animal organ development	GO:0048513	FALSE	7.00096E-06	5.154842460860468	3085	187	59	21026	ENSG00000086696,ENSG00000133083,ENSG00000143631,ENSG00000180875,ENSG00000162490,ENSG00000168646,ENSG00000103489,ENSG00000183638,ENSG00000120075,ENSG00000170961,ENSG00000205426,ENSG00000101115,ENSG00000069431,ENSG00000111335,ENSG00000203867,ENSG00000019549,ENSG00000136842,ENSG00000101096,ENSG00000127863,ENSG00000121068,ENSG00000185070,ENSG00000144730,ENSG00000149596,ENSG00000120068,ENSG00000027075…
GO:BP	skeletal system development	GO:0001501	FALSE	3.24568E-05	4.4886936914340305	540	187	21	21026	ENSG00000168646,ENSG00000103489,ENSG00000120075,ENSG00000170961,ENSG00000019549,ENSG00000101096,ENSG00000120068,ENSG00000187764,ENSG00000154237,ENSG00000260027,ENSG00000109705,ENSG00000101265,ENSG00000170689,ENSG00000182742,ENSG00000114251,ENSG00000120708,ENSG00000053254,ENSG00000074047,ENSG00000176887,ENSG00000125845,ENSG00000120093
GO:BP	regulation of biological process	GO:0050789	FALSE	7.51806E-05	4.123894391809651	12336	187	145	21026	ENSG00000133083,ENSG00000196660,ENSG00000075340,ENSG00000180875,ENSG00000053108,ENSG00000162490,ENSG00000168646,ENSG00000144476,ENSG00000026559,ENSG00000157445,ENSG00000183638,ENSG00000123572,ENSG00000087589,ENSG00000167693,ENSG00000152402,ENSG00000132639,ENSG00000158270,ENSG00000107282,ENSG00000120075,ENSG00000175928,ENSG00000170961,ENSG00000165376,ENSG00000151136,ENSG00000101115,ENSG00000069431…
GO:BP	biological regulation	GO:0065007	FALSE	8.70061E-05	4.060450366808306	12743	187	148	21026	ENSG00000086696,ENSG00000133083,ENSG00000196660,ENSG00000075340,ENSG00000180875,ENSG00000053108,ENSG00000162490,ENSG00000168646,ENSG00000144476,ENSG00000026559,ENSG00000157445,ENSG00000183638,ENSG00000123572,ENSG00000087589,ENSG00000167693,ENSG00000152402,ENSG00000132639,ENSG00000158270,ENSG00000107282,ENSG00000120075,ENSG00000175928,ENSG00000170961,ENSG00000165376,ENSG00000151136,ENSG00000101115…
GO:BP	regulation of developmental process	GO:0050793	FALSE	0.000181246	3.7417326596774396	2457	187	48	21026	ENSG00000053108,ENSG00000162490,ENSG00000168646,ENSG00000175928,ENSG00000111335,ENSG00000116574,ENSG00000019549,ENSG00000185338,ENSG00000158258,ENSG00000101096,ENSG00000083290,ENSG00000121068,ENSG00000185070,ENSG00000144730,ENSG00000188277,ENSG00000149596,ENSG00000120068,ENSG00000275342,ENSG00000027075,ENSG00000131477,ENSG00000132386,ENSG00000187764,ENSG00000260027,ENSG00000141576,ENSG00000115461…
GO:BP	circulatory system development	GO:0072359	FALSE	0.00019846	3.702327467682226	1145	187	30	21026	ENSG00000168646,ENSG00000144476,ENSG00000167693,ENSG00000170961,ENSG00000101115,ENSG00000069431,ENSG00000203867,ENSG00000019549,ENSG00000101096,ENSG00000121068,ENSG00000185070,ENSG00000149596,ENSG00000131477,ENSG00000132386,ENSG00000221866,ENSG00000130635,ENSG00000028137,ENSG00000172889,ENSG00000057657,ENSG00000170989,ENSG00000114251,ENSG00000120708,ENSG00000183873,ENSG00000074047,ENSG00000143494…
GO:BP	regulation of multicellular organismal development	GO:2000026	FALSE	0.000207259	3.683486986351983	1418	187	34	21026	ENSG00000053108,ENSG00000162490,ENSG00000168646,ENSG00000175928,ENSG00000111335,ENSG00000019549,ENSG00000185338,ENSG00000158258,ENSG00000083290,ENSG00000121068,ENSG00000185070,ENSG00000120068,ENSG00000027075,ENSG00000131477,ENSG00000132386,ENSG00000187764,ENSG00000109705,ENSG00000101265,ENSG00000221866,ENSG00000163823,ENSG00000028137,ENSG00000057657,ENSG00000170989,ENSG00000114251,ENSG00000074047…
GO:BP	cell junction assembly	GO:0034329	FALSE	0.000256589	3.5907619777643003	503	187	19	21026	ENSG00000133083,ENSG00000075340,ENSG00000132639,ENSG00000175928,ENSG00000165376,ENSG00000019549,ENSG00000158258,ENSG00000185070,ENSG00000027075,ENSG00000131477,ENSG00000187764,ENSG00000153292,ENSG00000128011,ENSG00000065618,ENSG00000114251,ENSG00000079308,ENSG00000112139,ENSG00000113209,ENSG00000150471
GO:BP	regulation of cell development	GO:0060284	FALSE	0.000289851	3.5378251185861815	847	187	25	21026	ENSG00000053108,ENSG00000162490,ENSG00000168646,ENSG00000019549,ENSG00000185338,ENSG00000083290,ENSG00000120068,ENSG00000027075,ENSG00000132386,ENSG00000187764,ENSG00000101265,ENSG00000221866,ENSG00000163823,ENSG00000028137,ENSG00000057657,ENSG00000114251,ENSG00000074047,ENSG00000137825,ENSG00000176887,ENSG00000125845,ENSG00000143772,ENSG00000120093,ENSG00000020181,ENSG00000276966,ENSG00000007372
GO:BP	tissue development	GO:0009888	FALSE	0.000319119	3.4960470367294456	2032	187	42	21026	ENSG00000143631,ENSG00000168646,ENSG00000120075,ENSG00000170961,ENSG00000205426,ENSG00000101115,ENSG00000069431,ENSG00000019549,ENSG00000136842,ENSG00000101096,ENSG00000127863,ENSG00000121068,ENSG00000144730,ENSG00000149596,ENSG00000027075,ENSG00000187764,ENSG00000260027,ENSG00000115461,ENSG00000109705,ENSG00000221866,ENSG00000131738,ENSG00000163823,ENSG00000130635,ENSG00000182742,ENSG00000057657…
GO:BP	nervous system development	GO:0007399	FALSE	0.00040519	3.3923409035131757	2604	187	49	21026	ENSG00000133083,ENSG00000075340,ENSG00000053108,ENSG00000162490,ENSG00000144476,ENSG00000183638,ENSG00000132639,ENSG00000107282,ENSG00000175928,ENSG00000101115,ENSG00000158258,ENSG00000083290,ENSG00000121068,ENSG00000185070,ENSG00000120068,ENSG00000275342,ENSG00000027075,ENSG00000132386,ENSG00000163485,ENSG00000187764,ENSG00000141576,ENSG00000104419,ENSG00000221866,ENSG00000153292,ENSG00000028137…
GO:BP	cell differentiation	GO:0030154	FALSE	0.00042521	3.371396933764951	4437	187	70	21026	ENSG00000133083,ENSG00000143631,ENSG00000075340,ENSG00000053108,ENSG00000162490,ENSG00000168646,ENSG00000144476,ENSG00000183638,ENSG00000167693,ENSG00000132639,ENSG00000120075,ENSG00000170961,ENSG00000205426,ENSG00000184792,ENSG00000019549,ENSG00000136842,ENSG00000185338,ENSG00000101096,ENSG00000083290,ENSG00000121068,ENSG00000185070,ENSG00000144730,ENSG00000120068,ENSG00000275342,ENSG00000027075…
GO:BP	cellular developmental process	GO:0048869	FALSE	0.000429068	3.3674738354049536	4438	187	70	21026	ENSG00000133083,ENSG00000143631,ENSG00000075340,ENSG00000053108,ENSG00000162490,ENSG00000168646,ENSG00000144476,ENSG00000183638,ENSG00000167693,ENSG00000132639,ENSG00000120075,ENSG00000170961,ENSG00000205426,ENSG00000184792,ENSG00000019549,ENSG00000136842,ENSG00000185338,ENSG00000101096,ENSG00000083290,ENSG00000121068,ENSG00000185070,ENSG00000144730,ENSG00000120068,ENSG00000275342,ENSG00000027075…
GO:BP	embryonic skeletal system development	GO:0048706	FALSE	0.000479296	3.319396469153833	129	187	10	21026	ENSG00000103489,ENSG00000120075,ENSG00000120068,ENSG00000260027,ENSG00000109705,ENSG00000170689,ENSG00000182742,ENSG00000114251,ENSG00000176887,ENSG00000120093
GO:BP	cell communication	GO:0007154	FALSE	0.000725504	3.139360137627932	6540	187	91	21026	ENSG00000133083,ENSG00000196660,ENSG00000180875,ENSG00000053108,ENSG00000162490,ENSG00000168646,ENSG00000144476,ENSG00000183638,ENSG00000123572,ENSG00000087589,ENSG00000167693,ENSG00000152402,ENSG00000132639,ENSG00000158270,ENSG00000107282,ENSG00000151136,ENSG00000069431,ENSG00000111335,ENSG00000167083,ENSG00000171435,ENSG00000124225,ENSG00000116574,ENSG00000019549,ENSG00000185338,ENSG00000158258…
GO:BP	cell junction organization	GO:0034330	FALSE	0.000832869	3.079423320470031	834	187	24	21026	ENSG00000133083,ENSG00000075340,ENSG00000157445,ENSG00000132639,ENSG00000175928,ENSG00000165376,ENSG00000121440,ENSG00000019549,ENSG00000158258,ENSG00000185070,ENSG00000027075,ENSG00000131477,ENSG00000187764,ENSG00000221866,ENSG00000153292,ENSG00000128011,ENSG00000065618,ENSG00000114251,ENSG00000079308,ENSG00000137825,ENSG00000112139,ENSG00000113209,ENSG00000155961,ENSG00000150471
GO:BP	regulation of cellular process	GO:0050794	FALSE	0.000900072	3.045722558244085	11946	187	139	21026	ENSG00000133083,ENSG00000196660,ENSG00000075340,ENSG00000180875,ENSG00000053108,ENSG00000162490,ENSG00000168646,ENSG00000144476,ENSG00000026559,ENSG00000157445,ENSG00000183638,ENSG00000123572,ENSG00000087589,ENSG00000167693,ENSG00000152402,ENSG00000132639,ENSG00000158270,ENSG00000107282,ENSG00000120075,ENSG00000175928,ENSG00000170961,ENSG00000101115,ENSG00000069431,ENSG00000137880,ENSG00000111335…
GO:BP	heart development	GO:0007507	FALSE	0.000988513	3.0050176584002837	605	187	20	21026	ENSG00000168646,ENSG00000170961,ENSG00000101115,ENSG00000069431,ENSG00000203867,ENSG00000019549,ENSG00000121068,ENSG00000185070,ENSG00000149596,ENSG00000131477,ENSG00000221866,ENSG00000130635,ENSG00000028137,ENSG00000057657,ENSG00000170989,ENSG00000114251,ENSG00000183873,ENSG00000074047,ENSG00000176887,ENSG00000125845
GO:BP	synapse assembly	GO:0007416	FALSE	0.00119217	2.923661874830449	259	187	13	21026	ENSG00000133083,ENSG00000075340,ENSG00000132639,ENSG00000175928,ENSG00000158258,ENSG00000185070,ENSG00000187764,ENSG00000153292,ENSG00000128011,ENSG00000114251,ENSG00000112139,ENSG00000113209,ENSG00000150471
GO:BP	chordate embryonic development	GO:0043009	FALSE	0.00122619	2.91144	671	187	21	21026	ENSG00000086696,ENSG00000168646,ENSG00000103489,ENSG00000167693,ENSG00000107282,ENSG00000120075,ENSG00000101115,ENSG00000121068,ENSG00000120068,ENSG00000260027,ENSG00000109705,ENSG00000170689,ENSG00000182742,ENSG00000057657,ENSG00000114251,ENSG00000074047,ENSG00000143494,ENSG00000176887,ENSG00000125845,ENSG00000120093,ENSG00000007372
GO:BP	regulation of multicellular organismal process	GO:0051239	FALSE	0.00126978	2.896273033004416	2956	187	52	21026	ENSG00000053108,ENSG00000162490,ENSG00000168646,ENSG00000175928,ENSG00000170961,ENSG00000165376,ENSG00000069431,ENSG00000111335,ENSG00000171435,ENSG00000019549,ENSG00000185338,ENSG00000158258,ENSG00000101096,ENSG00000083290,ENSG00000121068,ENSG00000185070,ENSG00000144730,ENSG00000120068,ENSG00000130176,ENSG00000027075,ENSG00000131477,ENSG00000132386,ENSG00000163485,ENSG00000187764,ENSG00000115594…
GO:BP	signaling	GO:0023052	FALSE	0.00128628	2.8906654513895016	6515	187	90	21026	ENSG00000133083,ENSG00000196660,ENSG00000180875,ENSG00000053108,ENSG00000162490,ENSG00000168646,ENSG00000144476,ENSG00000183638,ENSG00000123572,ENSG00000087589,ENSG00000167693,ENSG00000152402,ENSG00000132639,ENSG00000158270,ENSG00000107282,ENSG00000151136,ENSG00000069431,ENSG00000111335,ENSG00000167083,ENSG00000171435,ENSG00000124225,ENSG00000116574,ENSG00000019549,ENSG00000185338,ENSG00000158258…
GO:BP	regulation of nervous system development	GO:0051960	FALSE	0.00150535	2.8223613314078038	457	187	17	21026	ENSG00000053108,ENSG00000162490,ENSG00000175928,ENSG00000158258,ENSG00000083290,ENSG00000185070,ENSG00000027075,ENSG00000132386,ENSG00000187764,ENSG00000221866,ENSG00000028137,ENSG00000114251,ENSG00000137825,ENSG00000176887,ENSG00000125845,ENSG00000120093,ENSG00000007372
GO:BP	embryo development ending in birth or egg hatching	GO:0009792	FALSE	0.00201186	2.6964031614409536	692	187	21	21026	ENSG00000086696,ENSG00000168646,ENSG00000103489,ENSG00000167693,ENSG00000107282,ENSG00000120075,ENSG00000101115,ENSG00000121068,ENSG00000120068,ENSG00000260027,ENSG00000109705,ENSG00000170689,ENSG00000182742,ENSG00000057657,ENSG00000114251,ENSG00000074047,ENSG00000143494,ENSG00000176887,ENSG00000125845,ENSG00000120093,ENSG00000007372
GO:BP	epithelium development	GO:0060429	FALSE	0.00329944	2.4815593949010815	1238	187	29	21026	ENSG00000143631,ENSG00000168646,ENSG00000120075,ENSG00000205426,ENSG00000101115,ENSG00000019549,ENSG00000136842,ENSG00000127863,ENSG00000121068,ENSG00000027075,ENSG00000260027,ENSG00000115461,ENSG00000109705,ENSG00000221866,ENSG00000131738,ENSG00000130635,ENSG00000182742,ENSG00000057657,ENSG00000170989,ENSG00000114251,ENSG00000169744,ENSG00000074047,ENSG00000135439,ENSG00000213139,ENSG00000006016…
GO:BP	animal organ morphogenesis	GO:0009887	FALSE	0.00387882	2.411300157713125	1042	187	26	21026	ENSG00000180875,ENSG00000168646,ENSG00000120075,ENSG00000170961,ENSG00000069431,ENSG00000203867,ENSG00000019549,ENSG00000121068,ENSG00000185070,ENSG00000120068,ENSG00000260027,ENSG00000115461,ENSG00000109705,ENSG00000170689,ENSG00000130635,ENSG00000182742,ENSG00000057657,ENSG00000170989,ENSG00000114251,ENSG00000183873,ENSG00000053254,ENSG00000074047,ENSG00000176887,ENSG00000125845,ENSG00000120093…
GO:BP	cell surface receptor signaling pathway	GO:0007166	FALSE	0.00427223	2.3693455760852014	2819	187	49	21026	ENSG00000196660,ENSG00000180875,ENSG00000053108,ENSG00000162490,ENSG00000168646,ENSG00000144476,ENSG00000087589,ENSG00000167693,ENSG00000111335,ENSG00000124225,ENSG00000019549,ENSG00000185338,ENSG00000101096,ENSG00000127863,ENSG00000121068,ENSG00000196814,ENSG00000185070,ENSG00000144730,ENSG00000275342,ENSG00000027075,ENSG00000155011,ENSG00000163485,ENSG00000187764,ENSG00000154237,ENSG00000115594…
GO:BP	negative regulation of cell differentiation	GO:0045596	FALSE	0.0048642	2.3129889285207903	671	187	20	21026	ENSG00000053108,ENSG00000162490,ENSG00000168646,ENSG00000019549,ENSG00000185338,ENSG00000101096,ENSG00000083290,ENSG00000144730,ENSG00000120068,ENSG00000187764,ENSG00000115461,ENSG00000109705,ENSG00000130635,ENSG00000114251,ENSG00000074047,ENSG00000176887,ENSG00000125845,ENSG00000143772,ENSG00000276966,ENSG00000007372
GO:BP	synapse organization	GO:0050808	FALSE	0.00607417	2.21651	563	187	18	21026	ENSG00000133083,ENSG00000075340,ENSG00000157445,ENSG00000132639,ENSG00000175928,ENSG00000121440,ENSG00000158258,ENSG00000185070,ENSG00000187764,ENSG00000221866,ENSG00000153292,ENSG00000128011,ENSG00000114251,ENSG00000137825,ENSG00000112139,ENSG00000113209,ENSG00000155961,ENSG00000150471
GO:BP	cell development	GO:0048468	FALSE	0.00756542	2.121166959817762	2876	187	49	21026	ENSG00000133083,ENSG00000075340,ENSG00000053108,ENSG00000162490,ENSG00000168646,ENSG00000183638,ENSG00000132639,ENSG00000184792,ENSG00000019549,ENSG00000136842,ENSG00000185338,ENSG00000101096,ENSG00000083290,ENSG00000185070,ENSG00000120068,ENSG00000275342,ENSG00000027075,ENSG00000131477,ENSG00000132386,ENSG00000187764,ENSG00000154237,ENSG00000260027,ENSG00000141576,ENSG00000109705,ENSG00000101265…
GO:BP	embryonic organ development	GO:0048568	FALSE	0.0083075	2.0805293673895258	463	187	16	21026	ENSG00000120075,ENSG00000121068,ENSG00000120068,ENSG00000260027,ENSG00000109705,ENSG00000221866,ENSG00000170689,ENSG00000182742,ENSG00000132688,ENSG00000057657,ENSG00000114251,ENSG00000074047,ENSG00000143494,ENSG00000176887,ENSG00000120093,ENSG00000007372
GO:BP	heart morphogenesis	GO:0003007	FALSE	0.00984587	2.006745948587586	266	187	12	21026	ENSG00000168646,ENSG00000170961,ENSG00000069431,ENSG00000203867,ENSG00000019549,ENSG00000121068,ENSG00000185070,ENSG00000130635,ENSG00000170989,ENSG00000114251,ENSG00000176887,ENSG00000125845
GO:BP	cell migration	GO:0016477	TRUE	0.0104806	1.9796144670540743	1534	187	32	21026	ENSG00000133083,ENSG00000075340,ENSG00000144476,ENSG00000087589,ENSG00000170961,ENSG00000019549,ENSG00000101096,ENSG00000185070,ENSG00000275342,ENSG00000132386,ENSG00000163485,ENSG00000187764,ENSG00000115594,ENSG00000115461,ENSG00000221866,ENSG00000170689,ENSG00000163823,ENSG00000130635,ENSG00000170989,ENSG00000169439,ENSG00000114251,ENSG00000079308,ENSG00000169744,ENSG00000095203,ENSG00000172403…
GO:BP	signal transduction	GO:0007165	FALSE	0.010682271938084225	1.9713363704123659	6002	187	82	21026	ENSG00000133083,ENSG00000196660,ENSG00000180875,ENSG00000053108,ENSG00000162490,ENSG00000168646,ENSG00000144476,ENSG00000183638,ENSG00000123572,ENSG00000087589,ENSG00000167693,ENSG00000152402,ENSG00000158270,ENSG00000069431,ENSG00000111335,ENSG00000167083,ENSG00000171435,ENSG00000124225,ENSG00000116574,ENSG00000019549,ENSG00000185338,ENSG00000101096,ENSG00000083290,ENSG00000127863,ENSG00000121068…
GO:BP	anterior/posterior pattern specification	GO:0009952	TRUE	0.011529522308452882	1.9381886860357975	225	187	11	21026	ENSG00000168646,ENSG00000120075,ENSG00000120068,ENSG00000260027,ENSG00000170689,ENSG00000182742,ENSG00000114251,ENSG00000074047,ENSG00000125845,ENSG00000120093,ENSG00000007372
GO:BP	cellular response to calcium ion	GO:0071277	TRUE	0.012200366955021236	1.913627106690486	78	187	7	21026	ENSG00000069431,ENSG00000101096,ENSG00000114251,ENSG00000132965,ENSG00000183873,ENSG00000137825,ENSG00000143772
GO:BP	positive regulation of intracellular signal transduction	GO:1902533	FALSE	0.012750606178204858	1.8944691678895174	1113	187	26	21026	ENSG00000196660,ENSG00000144476,ENSG00000123572,ENSG00000087589,ENSG00000152402,ENSG00000171435,ENSG00000127863,ENSG00000275342,ENSG00000163485,ENSG00000187764,ENSG00000154237,ENSG00000115461,ENSG00000101265,ENSG00000177374,ENSG00000163823,ENSG00000114251,ENSG00000135299,ENSG00000170214,ENSG00000147145,ENSG00000135439,ENSG00000169047,ENSG00000176887,ENSG00000125845,ENSG00000143772,ENSG00000173848…
GO:BP	cellular response to stimulus	GO:0051716	FALSE	0.0136695	1.8642467870065966	7376	187	95	21026	ENSG00000133083,ENSG00000196660,ENSG00000180875,ENSG00000053108,ENSG00000162490,ENSG00000168646,ENSG00000144476,ENSG00000183638,ENSG00000123572,ENSG00000087589,ENSG00000167693,ENSG00000152402,ENSG00000158270,ENSG00000170961,ENSG00000069431,ENSG00000111335,ENSG00000167083,ENSG00000171435,ENSG00000124225,ENSG00000116574,ENSG00000019549,ENSG00000185338,ENSG00000101096,ENSG00000083290,ENSG00000127863…
GO:BP	regulation of neurogenesis	GO:0050767	FALSE	0.015540621014326962	1.8085316304703332	378	187	14	21026	ENSG00000053108,ENSG00000162490,ENSG00000083290,ENSG00000027075,ENSG00000132386,ENSG00000187764,ENSG00000221866,ENSG00000028137,ENSG00000114251,ENSG00000137825,ENSG00000176887,ENSG00000125845,ENSG00000120093,ENSG00000007372
GO:BP	negative regulation of developmental process	GO:0051093	FALSE	0.0169632	1.7704909389131591	925	187	23	21026	ENSG00000053108,ENSG00000162490,ENSG00000168646,ENSG00000019549,ENSG00000185338,ENSG00000101096,ENSG00000083290,ENSG00000121068,ENSG00000144730,ENSG00000120068,ENSG00000132386,ENSG00000187764,ENSG00000115461,ENSG00000109705,ENSG00000163823,ENSG00000130635,ENSG00000114251,ENSG00000074047,ENSG00000176887,ENSG00000125845,ENSG00000143772,ENSG00000276966,ENSG00000007372
GO:BP	skeletal system morphogenesis	GO:0048705	FALSE	0.017412939170516818	1.7591279171192011	235	187	11	21026	ENSG00000168646,ENSG00000120075,ENSG00000170961,ENSG00000120068,ENSG00000260027,ENSG00000109705,ENSG00000170689,ENSG00000182742,ENSG00000053254,ENSG00000176887,ENSG00000120093
GO:BP	intracellular signal transduction	GO:0035556	FALSE	0.017724459624248106	1.7514269965276665	2965	187	49	21026	ENSG00000133083,ENSG00000196660,ENSG00000144476,ENSG00000183638,ENSG00000123572,ENSG00000087589,ENSG00000152402,ENSG00000158270,ENSG00000069431,ENSG00000171435,ENSG00000124225,ENSG00000116574,ENSG00000019549,ENSG00000185338,ENSG00000101096,ENSG00000127863,ENSG00000188277,ENSG00000275342,ENSG00000027075,ENSG00000163485,ENSG00000187764,ENSG00000154237,ENSG00000115461,ENSG00000101265,ENSG00000177374…
GO:BP	regulation of cell differentiation	GO:0045595	FALSE	0.0182366	1.7390568833131226	1576	187	32	21026	ENSG00000053108,ENSG00000162490,ENSG00000168646,ENSG00000019549,ENSG00000185338,ENSG00000101096,ENSG00000083290,ENSG00000144730,ENSG00000120068,ENSG00000027075,ENSG00000131477,ENSG00000132386,ENSG00000187764,ENSG00000115461,ENSG00000109705,ENSG00000101265,ENSG00000221866,ENSG00000163823,ENSG00000130635,ENSG00000028137,ENSG00000182742,ENSG00000057657,ENSG00000114251,ENSG00000074047,ENSG00000137825…
GO:BP	small GTPase-mediated signal transduction	GO:0007264	TRUE	0.024625966928855082	1.6086067080944393	505	187	16	21026	ENSG00000171435,ENSG00000116574,ENSG00000188277,ENSG00000275342,ENSG00000187764,ENSG00000139998,ENSG00000031081,ENSG00000104140,ENSG00000123570,ENSG00000147145,ENSG00000143772,ENSG00000155961,ENSG00000136895,ENSG00000173848,ENSG00000153404,ENSG00000050327
GO:BP	positive regulation of nervous system development	GO:0051962	FALSE	0.0289153	1.5388722935565105	296	187	12	21026	ENSG00000175928,ENSG00000158258,ENSG00000185070,ENSG00000027075,ENSG00000132386,ENSG00000187764,ENSG00000221866,ENSG00000028137,ENSG00000137825,ENSG00000176887,ENSG00000125845,ENSG00000007372
GO:BP	regulation of signal transduction	GO:0009966	FALSE	0.033189805804259856	1.478995288669585	3034	187	49	21026	ENSG00000196660,ENSG00000180875,ENSG00000053108,ENSG00000162490,ENSG00000168646,ENSG00000144476,ENSG00000123572,ENSG00000087589,ENSG00000167693,ENSG00000152402,ENSG00000171435,ENSG00000124225,ENSG00000116574,ENSG00000019549,ENSG00000185338,ENSG00000127863,ENSG00000196814,ENSG00000144730,ENSG00000275342,ENSG00000027075,ENSG00000131477,ENSG00000155011,ENSG00000163485,ENSG00000187764,ENSG00000154237…
GO:BP	regulation of synapse assembly	GO:0051963	FALSE	0.034915511529176706	1.4569815909515789	165	187	9	21026	ENSG00000133083,ENSG00000132639,ENSG00000175928,ENSG00000158258,ENSG00000185070,ENSG00000187764,ENSG00000128011,ENSG00000114251,ENSG00000112139
GO:BP	embryonic camera-type eye development	GO:0031076	FALSE	0.0364977	1.4377344232973581	37	187	5	21026	ENSG00000121068,ENSG00000132688,ENSG00000114251,ENSG00000176887,ENSG00000007372
GO:BP	embryonic organ morphogenesis	GO:0048562	FALSE	0.0389122	1.4099138953839565	305	187	12	21026	ENSG00000120075,ENSG00000121068,ENSG00000120068,ENSG00000260027,ENSG00000109705,ENSG00000170689,ENSG00000182742,ENSG00000114251,ENSG00000074047,ENSG00000176887,ENSG00000120093,ENSG00000007372
GO:BP	embryonic skeletal system morphogenesis	GO:0048704	FALSE	0.0391111	1.4077003003387043	93	187	7	21026	ENSG00000120075,ENSG00000120068,ENSG00000260027,ENSG00000170689,ENSG00000182742,ENSG00000176887,ENSG00000120093
GO:BP	negative regulation of Wnt signaling pathway	GO:0030178	TRUE	0.048563406594682675	1.313690856253613	172	187	9	21026	ENSG00000162490,ENSG00000168646,ENSG00000167693,ENSG00000019549,ENSG00000155011,ENSG00000177374,ENSG00000114251,ENSG00000135299,ENSG00000125845
GO:BP	regulation of cell junction assembly	GO:1901888	FALSE	0.049714	1.303521560397396	263	187	11	21026	ENSG00000133083,ENSG00000132639,ENSG00000175928,ENSG00000019549,ENSG00000158258,ENSG00000185070,ENSG00000027075,ENSG00000187764,ENSG00000128011,ENSG00000114251,ENSG00000112139
GO:CC	cell periphery	GO:0071944	TRUE	5.22732E-06	5.281720964312553	6347	193	92	22149	ENSG00000133083,ENSG00000196660,ENSG00000143631,ENSG00000075340,ENSG00000168646,ENSG00000119686,ENSG00000144476,ENSG00000026559,ENSG00000157445,ENSG00000087589,ENSG00000132639,ENSG00000138316,ENSG00000158270,ENSG00000107282,ENSG00000175928,ENSG00000170961,ENSG00000165376,ENSG00000069431,ENSG00000184792,ENSG00000167083,ENSG00000171435,ENSG00000124225,ENSG00000116574,ENSG00000136842,ENSG00000158258…
GO:CC	plasma membrane	GO:0005886	FALSE	0.000153936	3.812658890206318	5866	193	83	22149	ENSG00000133083,ENSG00000196660,ENSG00000143631,ENSG00000075340,ENSG00000168646,ENSG00000119686,ENSG00000144476,ENSG00000026559,ENSG00000157445,ENSG00000087589,ENSG00000132639,ENSG00000158270,ENSG00000107282,ENSG00000170961,ENSG00000165376,ENSG00000069431,ENSG00000184792,ENSG00000167083,ENSG00000171435,ENSG00000124225,ENSG00000116574,ENSG00000158258,ENSG00000127863,ENSG00000196814,ENSG00000185070…
GO:CC	cell junction	GO:0030054	TRUE	0.00256867	2.590291618623406	2401	193	42	22149	ENSG00000133083,ENSG00000075340,ENSG00000157445,ENSG00000087589,ENSG00000132639,ENSG00000107282,ENSG00000165376,ENSG00000151136,ENSG00000121440,ENSG00000116574,ENSG00000158258,ENSG00000221890,ENSG00000185070,ENSG00000275342,ENSG00000130176,ENSG00000027075,ENSG00000163485,ENSG00000187764,ENSG00000104419,ENSG00000221866,ENSG00000128011,ENSG00000031081,ENSG00000170989,ENSG00000168243,ENSG00000065618…
GO:CC	extracellular matrix	GO:0031012	FALSE	0.040160198128896506	1.3962041532815082	559	193	15	22149	ENSG00000143631,ENSG00000138316,ENSG00000158270,ENSG00000175928,ENSG00000185070,ENSG00000132386,ENSG00000162804,ENSG00000130635,ENSG00000172889,ENSG00000065618,ENSG00000169439,ENSG00000114251,ENSG00000120708,ENSG00000136859,ENSG00000103196
GO:CC	external encapsulating structure	GO:0030312	FALSE	0.040953866839573014	1.387705086142757	560	193	15	22149	ENSG00000143631,ENSG00000138316,ENSG00000158270,ENSG00000175928,ENSG00000185070,ENSG00000132386,ENSG00000162804,ENSG00000130635,ENSG00000172889,ENSG00000065618,ENSG00000169439,ENSG00000114251,ENSG00000120708,ENSG00000136859,ENSG00000103196
GO:CC	anchoring junction	GO:0070161	FALSE	0.0483788	1.3153447427013798	912	193	20	22149	ENSG00000087589,ENSG00000165376,ENSG00000116574,ENSG00000185070,ENSG00000275342,ENSG00000130176,ENSG00000027075,ENSG00000104419,ENSG00000031081,ENSG00000065618,ENSG00000079308,ENSG00000143375,ENSG00000196632,ENSG00000095203,ENSG00000183873,ENSG00000172403,ENSG00000074276,ENSG00000153404,ENSG00000150471,ENSG00000050327
TF	Factor: TFII-I; motif: RGAGGKAGG; match class: 1	TF:M00706_1	FALSE	0.013326251614772742	1.8752919910171737	1641	198	36	20092	ENSG00000150510,ENSG00000075340,ENSG00000053108,ENSG00000026559,ENSG00000157445,ENSG00000107282,ENSG00000175928,ENSG00000121440,ENSG00000124225,ENSG00000185338,ENSG00000158258,ENSG00000101096,ENSG00000131477,ENSG00000177374,ENSG00000221866,ENSG00000107719,ENSG00000197385,ENSG00000170689,ENSG00000130635,ENSG00000128011,ENSG00000163806,ENSG00000031081,ENSG00000169439,ENSG00000159958,ENSG00000196632…
TF	Factor: HA95; motif: CCSNSSCCNSCNCCWSCCNS; match class: 1	TF:M13127_1	FALSE	0.0223217	1.6512729191408497	8649	198	116	20092	ENSG00000133083,ENSG00000150510,ENSG00000075340,ENSG00000053108,ENSG00000162490,ENSG00000168646,ENSG00000119686,ENSG00000103489,ENSG00000026559,ENSG00000157445,ENSG00000123572,ENSG00000167693,ENSG00000152402,ENSG00000132639,ENSG00000138316,ENSG00000158270,ENSG00000107282,ENSG00000182013,ENSG00000175928,ENSG00000151136,ENSG00000101115,ENSG00000137880,ENSG00000184792,ENSG00000171435,ENSG00000124225…

## Sheet: GO_high_in_PFOS
source	term_name	term_id	highlighted	adjusted_p_value	negative_log10_of_adjusted_p_value	term_size	query_size	intersection_size	effective_domain_size	intersections
GO:MF	transmembrane receptor protein tyrosine kinase activity	GO:0004714	TRUE	0.000180001	3.744726130210061	81	238	9	20246	ENSG00000044524,ENSG00000128052,ENSG00000115380,ENSG00000138798,ENSG00000178568,ENSG00000174808,ENSG00000106123,ENSG00000080224,ENSG00000109321
GO:MF	transmembrane receptor protein kinase activity	GO:0019199	FALSE	0.00108162	2.96593	100	238	9	20246	ENSG00000044524,ENSG00000128052,ENSG00000115380,ENSG00000138798,ENSG00000178568,ENSG00000174808,ENSG00000106123,ENSG00000080224,ENSG00000109321
GO:MF	protein tyrosine kinase activity	GO:0004713	FALSE	0.0044312	2.3534788621406615	183	238	11	20246	ENSG00000044524,ENSG00000128052,ENSG00000115380,ENSG00000138798,ENSG00000178568,ENSG00000174808,ENSG00000106123,ENSG00000074966,ENSG00000080224,ENSG00000109321,ENSG00000254087
GO:MF	glycosaminoglycan binding	GO:0005539	TRUE	0.016109189295044256	1.7929263151703552	249	238	12	20246	ENSG00000173376,ENSG00000011201,ENSG00000103888,ENSG00000188488,ENSG00000114279,ENSG00000137801,ENSG00000123610,ENSG00000114631,ENSG00000011465,ENSG00000156140,ENSG00000118523,ENSG00000196104
GO:MF	signaling receptor binding	GO:0005102	TRUE	0.0173677	1.7602586778830394	1521	238	36	20246	ENSG00000128052,ENSG00000155629,ENSG00000136160,ENSG00000115380,ENSG00000158856,ENSG00000132470,ENSG00000122223,ENSG00000163288,ENSG00000029559,ENSG00000114279,ENSG00000138798,ENSG00000169860,ENSG00000137801,ENSG00000125538,ENSG00000178568,ENSG00000104368,ENSG00000114698,ENSG00000174808,ENSG00000135525,ENSG00000184371,ENSG00000136244,ENSG00000134363,ENSG00000141753,ENSG00000170873,ENSG00000182985…
GO:MF	epidermal growth factor receptor binding	GO:0005154	TRUE	0.0204665	1.6889555399334995	35	238	5	20246	ENSG00000115380,ENSG00000138798,ENSG00000178568,ENSG00000174808,ENSG00000109321
GO:MF	molecular transducer activity	GO:0060089	FALSE	0.024291166245115216	1.6145516337473917	2053	238	44	20246	ENSG00000126016,ENSG00000044524,ENSG00000143226,ENSG00000128052,ENSG00000172572,ENSG00000196482,ENSG00000153294,ENSG00000136160,ENSG00000152208,ENSG00000115380,ENSG00000185436,ENSG00000104998,ENSG00000164509,ENSG00000122223,ENSG00000163288,ENSG00000164128,ENSG00000114279,ENSG00000138798,ENSG00000152578,ENSG00000169860,ENSG00000125538,ENSG00000178568,ENSG00000179546,ENSG00000164342,ENSG00000167332…
GO:MF	signaling receptor activity	GO:0038023	TRUE	0.024291166245115216	1.6145516337473917	2053	238	44	20246	ENSG00000126016,ENSG00000044524,ENSG00000143226,ENSG00000128052,ENSG00000172572,ENSG00000196482,ENSG00000153294,ENSG00000136160,ENSG00000152208,ENSG00000115380,ENSG00000185436,ENSG00000104998,ENSG00000164509,ENSG00000122223,ENSG00000163288,ENSG00000164128,ENSG00000114279,ENSG00000138798,ENSG00000152578,ENSG00000169860,ENSG00000125538,ENSG00000178568,ENSG00000179546,ENSG00000164342,ENSG00000167332…
GO:MF	monoatomic ion channel activity	GO:0005216	TRUE	0.034760769032916576	1.4589106239650986	547	238	18	20246	ENSG00000198515,ENSG00000055732,ENSG00000130433,ENSG00000150625,ENSG00000154864,ENSG00000152208,ENSG00000112293,ENSG00000126562,ENSG00000163288,ENSG00000106688,ENSG00000083067,ENSG00000138741,ENSG00000153956,ENSG00000114279,ENSG00000152578,ENSG00000100342,ENSG00000005379,ENSG00000170745
GO:BP	multicellular organismal process	GO:0032501	TRUE	5.867990182841511e-13	12.231510621403624	7322	231	141	21026	ENSG00000126016,ENSG00000078596,ENSG00000154553,ENSG00000077420,ENSG00000152580,ENSG00000138772,ENSG00000051523,ENSG00000168878,ENSG00000146477,ENSG00000198515,ENSG00000173376,ENSG00000170373,ENSG00000044524,ENSG00000174482,ENSG00000055732,ENSG00000143226,ENSG00000128052,ENSG00000155307,ENSG00000183508,ENSG00000150625,ENSG00000172572,ENSG00000154864,ENSG00000101160,ENSG00000154645,ENSG00000196482…
GO:BP	tube morphogenesis	GO:0035239	FALSE	1.6771607692233694e-10	9.77543	879	231	39	21026	ENSG00000126016,ENSG00000138772,ENSG00000173376,ENSG00000128052,ENSG00000101160,ENSG00000112293,ENSG00000124212,ENSG00000126562,ENSG00000146021,ENSG00000163093,ENSG00000106688,ENSG00000076706,ENSG00000141449,ENSG00000114315,ENSG00000133454,ENSG00000105997,ENSG00000138798,ENSG00000005108,ENSG00000137801,ENSG00000125538,ENSG00000164342,ENSG00000081189,ENSG00000091831,ENSG00000184371,ENSG00000011465…
GO:BP	system development	GO:0048731	FALSE	2.1648544118388687e-10	9.66457	4053	231	93	21026	ENSG00000126016,ENSG00000154553,ENSG00000152580,ENSG00000138772,ENSG00000173376,ENSG00000044524,ENSG00000174482,ENSG00000055732,ENSG00000128052,ENSG00000150625,ENSG00000101160,ENSG00000154645,ENSG00000011201,ENSG00000069535,ENSG00000165379,ENSG00000136160,ENSG00000152208,ENSG00000112293,ENSG00000115380,ENSG00000143061,ENSG00000183715,ENSG00000124212,ENSG00000140297,ENSG00000138759,ENSG00000132470…
GO:BP	anatomical structure morphogenesis	GO:0009653	FALSE	5.179094042113063e-10	9.285746202980954	2713	231	72	21026	ENSG00000126016,ENSG00000138772,ENSG00000168878,ENSG00000173376,ENSG00000044524,ENSG00000128052,ENSG00000150625,ENSG00000101160,ENSG00000154645,ENSG00000150394,ENSG00000011201,ENSG00000152208,ENSG00000112293,ENSG00000115380,ENSG00000187689,ENSG00000158856,ENSG00000124212,ENSG00000140297,ENSG00000138759,ENSG00000136960,ENSG00000132470,ENSG00000126562,ENSG00000146021,ENSG00000163093,ENSG00000164128…
GO:BP	multicellular organism development	GO:0007275	FALSE	2.502705972435742e-9	8.601590169988027	4727	231	100	21026	ENSG00000126016,ENSG00000154553,ENSG00000152580,ENSG00000138772,ENSG00000173376,ENSG00000044524,ENSG00000174482,ENSG00000055732,ENSG00000128052,ENSG00000183508,ENSG00000150625,ENSG00000101160,ENSG00000154645,ENSG00000011201,ENSG00000069535,ENSG00000165379,ENSG00000136160,ENSG00000152208,ENSG00000112293,ENSG00000115380,ENSG00000187689,ENSG00000143061,ENSG00000183715,ENSG00000124212,ENSG00000140297…
GO:BP	tube development	GO:0035295	FALSE	2.5181593450668562e-9	8.598916791903418	1101	231	42	21026	ENSG00000126016,ENSG00000138772,ENSG00000173376,ENSG00000128052,ENSG00000101160,ENSG00000136160,ENSG00000112293,ENSG00000124212,ENSG00000126562,ENSG00000146021,ENSG00000163093,ENSG00000106688,ENSG00000076706,ENSG00000141449,ENSG00000114315,ENSG00000133454,ENSG00000105997,ENSG00000138798,ENSG00000005108,ENSG00000137801,ENSG00000125538,ENSG00000164342,ENSG00000081189,ENSG00000091831,ENSG00000184371…
GO:BP	regulation of multicellular organismal process	GO:0051239	FALSE	3.962096839559042e-9	8.402074913862553	2956	231	74	21026	ENSG00000126016,ENSG00000138772,ENSG00000051523,ENSG00000174482,ENSG00000143226,ENSG00000128052,ENSG00000155307,ENSG00000172572,ENSG00000154645,ENSG00000196482,ENSG00000165379,ENSG00000136160,ENSG00000152208,ENSG00000112293,ENSG00000115380,ENSG00000187689,ENSG00000124212,ENSG00000136960,ENSG00000104998,ENSG00000164509,ENSG00000114115,ENSG00000126562,ENSG00000122223,ENSG00000164128,ENSG00000106688…
GO:BP	anatomical structure development	GO:0048856	FALSE	4.52781323288027e-9	8.344111495601226	5997	231	116	21026	ENSG00000126016,ENSG00000078596,ENSG00000154553,ENSG00000152580,ENSG00000138772,ENSG00000168878,ENSG00000173376,ENSG00000044524,ENSG00000174482,ENSG00000055732,ENSG00000128052,ENSG00000183508,ENSG00000150625,ENSG00000172572,ENSG00000101160,ENSG00000154645,ENSG00000150394,ENSG00000011201,ENSG00000069535,ENSG00000165379,ENSG00000136160,ENSG00000152208,ENSG00000112293,ENSG00000115380,ENSG00000187689…
GO:BP	cell migration	GO:0016477	FALSE	1.6678882212446033e-8	7.777833058328568	1534	231	49	21026	ENSG00000126016,ENSG00000152580,ENSG00000138772,ENSG00000173376,ENSG00000044524,ENSG00000128052,ENSG00000150625,ENSG00000150394,ENSG00000136160,ENSG00000112293,ENSG00000158856,ENSG00000136960,ENSG00000103888,ENSG00000132470,ENSG00000104998,ENSG00000076706,ENSG00000137261,ENSG00000114315,ENSG00000102409,ENSG00000138798,ENSG00000169860,ENSG00000137801,ENSG00000125538,ENSG00000178568,ENSG00000104368…
GO:BP	regulation of biological quality	GO:0065008	TRUE	2.9040445256487092e-8	7.536996729192572	2947	231	72	21026	ENSG00000126016,ENSG00000051523,ENSG00000181804,ENSG00000146477,ENSG00000174482,ENSG00000128052,ENSG00000183508,ENSG00000150625,ENSG00000172572,ENSG00000154864,ENSG00000101160,ENSG00000150394,ENSG00000165379,ENSG00000136160,ENSG00000152208,ENSG00000112293,ENSG00000158856,ENSG00000138109,ENSG00000123405,ENSG00000147614,ENSG00000114115,ENSG00000126562,ENSG00000163288,ENSG00000164128,ENSG00000106688…
GO:BP	developmental process	GO:0032502	FALSE	6.623061759600435e-8	7.178941195167725	6553	231	120	21026	ENSG00000126016,ENSG00000078596,ENSG00000154553,ENSG00000152580,ENSG00000138772,ENSG00000168878,ENSG00000173376,ENSG00000044524,ENSG00000174482,ENSG00000055732,ENSG00000128052,ENSG00000183508,ENSG00000150625,ENSG00000172572,ENSG00000101160,ENSG00000154645,ENSG00000150394,ENSG00000011201,ENSG00000069535,ENSG00000165379,ENSG00000136160,ENSG00000152208,ENSG00000112293,ENSG00000115380,ENSG00000187689…
GO:BP	positive regulation of multicellular organismal process	GO:0051240	FALSE	9.413603058783997e-8	7.026244118437987	1667	231	50	21026	ENSG00000126016,ENSG00000138772,ENSG00000051523,ENSG00000174482,ENSG00000143226,ENSG00000128052,ENSG00000154645,ENSG00000196482,ENSG00000136160,ENSG00000152208,ENSG00000112293,ENSG00000124212,ENSG00000104998,ENSG00000122223,ENSG00000106688,ENSG00000138741,ENSG00000114315,ENSG00000138798,ENSG00000169860,ENSG00000137801,ENSG00000001561,ENSG00000125538,ENSG00000120738,ENSG00000178568,ENSG00000104368…
GO:BP	blood vessel morphogenesis	GO:0048514	FALSE	1.7686766617415357e-7	6.752351554798797	635	231	29	21026	ENSG00000126016,ENSG00000138772,ENSG00000173376,ENSG00000128052,ENSG00000112293,ENSG00000124212,ENSG00000106688,ENSG00000076706,ENSG00000114315,ENSG00000133454,ENSG00000105997,ENSG00000138798,ENSG00000005108,ENSG00000137801,ENSG00000125538,ENSG00000164342,ENSG00000011465,ENSG00000179388,ENSG00000138061,ENSG00000136244,ENSG00000141448,ENSG00000127329,ENSG00000116016,ENSG00000118523,ENSG00000117525…
GO:BP	blood vessel development	GO:0001568	FALSE	2.4623340032502105e-7	6.608653037541983	732	231	31	21026	ENSG00000126016,ENSG00000138772,ENSG00000173376,ENSG00000128052,ENSG00000112293,ENSG00000124212,ENSG00000106688,ENSG00000076706,ENSG00000114315,ENSG00000133454,ENSG00000105997,ENSG00000138798,ENSG00000005108,ENSG00000137801,ENSG00000125538,ENSG00000120738,ENSG00000164342,ENSG00000081189,ENSG00000011465,ENSG00000179388,ENSG00000138061,ENSG00000136244,ENSG00000141448,ENSG00000127329,ENSG00000116016…
GO:BP	response to external stimulus	GO:0009605	FALSE	5.013687304494648e-7	6.299842755772153	2415	231	61	21026	ENSG00000126016,ENSG00000138772,ENSG00000051523,ENSG00000181804,ENSG00000179914,ENSG00000128052,ENSG00000150625,ENSG00000154864,ENSG00000155629,ENSG00000011201,ENSG00000069535,ENSG00000165379,ENSG00000136160,ENSG00000152208,ENSG00000185436,ENSG00000124212,ENSG00000136960,ENSG00000172264,ENSG00000104998,ENSG00000164509,ENSG00000122223,ENSG00000106688,ENSG00000137261,ENSG00000138741,ENSG00000153283…
GO:BP	circulatory system development	GO:0072359	FALSE	5.172499012977555e-7	6.286299583534812	1145	231	39	21026	ENSG00000126016,ENSG00000154553,ENSG00000138772,ENSG00000173376,ENSG00000128052,ENSG00000112293,ENSG00000124212,ENSG00000163093,ENSG00000164128,ENSG00000106688,ENSG00000076706,ENSG00000141449,ENSG00000114315,ENSG00000133454,ENSG00000105997,ENSG00000114279,ENSG00000138798,ENSG00000005108,ENSG00000137801,ENSG00000125538,ENSG00000120738,ENSG00000178568,ENSG00000164342,ENSG00000081189,ENSG00000011465…
GO:BP	vasculature development	GO:0001944	FALSE	6.598019261292539e-7	6.180586420973025	762	231	31	21026	ENSG00000126016,ENSG00000138772,ENSG00000173376,ENSG00000128052,ENSG00000112293,ENSG00000124212,ENSG00000106688,ENSG00000076706,ENSG00000114315,ENSG00000133454,ENSG00000105997,ENSG00000138798,ENSG00000005108,ENSG00000137801,ENSG00000125538,ENSG00000120738,ENSG00000164342,ENSG00000081189,ENSG00000011465,ENSG00000179388,ENSG00000138061,ENSG00000136244,ENSG00000141448,ENSG00000127329,ENSG00000116016…
GO:BP	angiogenesis	GO:0001525	FALSE	7.647408834043731e-7	6.116485691604838	547	231	26	21026	ENSG00000126016,ENSG00000138772,ENSG00000173376,ENSG00000128052,ENSG00000112293,ENSG00000124212,ENSG00000076706,ENSG00000105997,ENSG00000138798,ENSG00000005108,ENSG00000137801,ENSG00000125538,ENSG00000164342,ENSG00000011465,ENSG00000179388,ENSG00000138061,ENSG00000136244,ENSG00000141448,ENSG00000127329,ENSG00000116016,ENSG00000118523,ENSG00000117525,ENSG00000154188,ENSG00000073756,ENSG00000101384…
GO:BP	cell motility	GO:0048870	FALSE	1.19874e-06	5.9212762188759305	1793	231	50	21026	ENSG00000126016,ENSG00000152580,ENSG00000138772,ENSG00000173376,ENSG00000044524,ENSG00000128052,ENSG00000150625,ENSG00000150394,ENSG00000136160,ENSG00000112293,ENSG00000158856,ENSG00000136960,ENSG00000103888,ENSG00000132470,ENSG00000104998,ENSG00000076706,ENSG00000137261,ENSG00000114315,ENSG00000102409,ENSG00000138798,ENSG00000169860,ENSG00000137801,ENSG00000125538,ENSG00000178568,ENSG00000104368…
GO:BP	animal organ development	GO:0048513	FALSE	1.746e-06	5.7579565492368765	3085	231	70	21026	ENSG00000154553,ENSG00000138772,ENSG00000168878,ENSG00000173376,ENSG00000044524,ENSG00000055732,ENSG00000128052,ENSG00000150625,ENSG00000101160,ENSG00000154645,ENSG00000069535,ENSG00000136160,ENSG00000152208,ENSG00000112293,ENSG00000115380,ENSG00000187689,ENSG00000143061,ENSG00000140297,ENSG00000138759,ENSG00000132470,ENSG00000172264,ENSG00000126562,ENSG00000146021,ENSG00000029559,ENSG00000163093…
GO:BP	cell adhesion	GO:0007155	TRUE	1.99993e-06	5.698986233326662	1530	231	45	21026	ENSG00000077420,ENSG00000173376,ENSG00000044524,ENSG00000128052,ENSG00000150394,ENSG00000011201,ENSG00000165379,ENSG00000152208,ENSG00000187689,ENSG00000183715,ENSG00000158856,ENSG00000132470,ENSG00000175161,ENSG00000029559,ENSG00000076706,ENSG00000177839,ENSG00000153283,ENSG00000114315,ENSG00000137801,ENSG00000125538,ENSG00000166689,ENSG00000163531,ENSG00000162711,ENSG00000123610,ENSG00000114631…
GO:BP	anatomical structure formation involved in morphogenesis	GO:0048646	FALSE	2.2483e-05	4.648145800752693	1199	231	37	21026	ENSG00000126016,ENSG00000138772,ENSG00000173376,ENSG00000128052,ENSG00000152208,ENSG00000112293,ENSG00000187689,ENSG00000124212,ENSG00000132470,ENSG00000106688,ENSG00000076706,ENSG00000114315,ENSG00000105997,ENSG00000138798,ENSG00000005108,ENSG00000137801,ENSG00000125538,ENSG00000174607,ENSG00000164342,ENSG00000081189,ENSG00000011465,ENSG00000179388,ENSG00000138061,ENSG00000136244,ENSG00000141448…
GO:BP	response to stimulus	GO:0050896	FALSE	3.04058e-05	4.5170440520146435	8999	231	141	21026	ENSG00000126016,ENSG00000112541,ENSG00000078596,ENSG00000077420,ENSG00000138772,ENSG00000051523,ENSG00000181804,ENSG00000146477,ENSG00000189221,ENSG00000179914,ENSG00000173376,ENSG00000170373,ENSG00000044524,ENSG00000055732,ENSG00000143226,ENSG00000128052,ENSG00000155307,ENSG00000150625,ENSG00000172572,ENSG00000154864,ENSG00000196482,ENSG00000155629,ENSG00000150394,ENSG00000011201,ENSG00000168772…
GO:BP	regulation of cell migration	GO:0030334	FALSE	4.21142e-05	4.375571575962944	960	231	32	21026	ENSG00000126016,ENSG00000152580,ENSG00000138772,ENSG00000128052,ENSG00000112293,ENSG00000158856,ENSG00000136960,ENSG00000103888,ENSG00000104998,ENSG00000076706,ENSG00000102409,ENSG00000138798,ENSG00000137801,ENSG00000125538,ENSG00000178568,ENSG00000081189,ENSG00000123610,ENSG00000184371,ENSG00000011465,ENSG00000138061,ENSG00000136244,ENSG00000174600,ENSG00000120129,ENSG00000197635,ENSG00000134602…
GO:BP	regulation of locomotion	GO:0040012	FALSE	4.38967e-05	4.357568311683358	1067	231	34	21026	ENSG00000126016,ENSG00000152580,ENSG00000138772,ENSG00000128052,ENSG00000112293,ENSG00000158856,ENSG00000136960,ENSG00000103888,ENSG00000104998,ENSG00000076706,ENSG00000102409,ENSG00000138798,ENSG00000137801,ENSG00000125538,ENSG00000178568,ENSG00000179546,ENSG00000081189,ENSG00000123610,ENSG00000184371,ENSG00000011465,ENSG00000138061,ENSG00000136244,ENSG00000174600,ENSG00000120129,ENSG00000196104…
GO:BP	positive regulation of developmental process	GO:0051094	FALSE	4.46282e-05	4.350390469191219	1343	231	39	21026	ENSG00000126016,ENSG00000138772,ENSG00000174482,ENSG00000128052,ENSG00000172572,ENSG00000154645,ENSG00000152208,ENSG00000187689,ENSG00000124212,ENSG00000136960,ENSG00000114315,ENSG00000138798,ENSG00000137801,ENSG00000125538,ENSG00000178568,ENSG00000162711,ENSG00000164342,ENSG00000081189,ENSG00000174808,ENSG00000184371,ENSG00000011465,ENSG00000179388,ENSG00000138061,ENSG00000136244,ENSG00000141448…
GO:BP	regulation of cell motility	GO:2000145	FALSE	5.29525e-05	4.276113618481177	1022	231	33	21026	ENSG00000126016,ENSG00000152580,ENSG00000138772,ENSG00000128052,ENSG00000112293,ENSG00000158856,ENSG00000136960,ENSG00000103888,ENSG00000104998,ENSG00000076706,ENSG00000102409,ENSG00000138798,ENSG00000137801,ENSG00000125538,ENSG00000178568,ENSG00000081189,ENSG00000123610,ENSG00000184371,ENSG00000011465,ENSG00000138061,ENSG00000136244,ENSG00000174600,ENSG00000120129,ENSG00000196104,ENSG00000197635…
GO:BP	cell surface receptor protein tyrosine kinase signaling pathway	GO:0007169	TRUE	6.08408e-05	4.215805296689711	629	231	25	21026	ENSG00000044524,ENSG00000128052,ENSG00000112293,ENSG00000115380,ENSG00000164509,ENSG00000138798,ENSG00000137801,ENSG00000125538,ENSG00000178568,ENSG00000104368,ENSG00000174808,ENSG00000184371,ENSG00000106123,ENSG00000011465,ENSG00000156140,ENSG00000080224,ENSG00000141753,ENSG00000170873,ENSG00000182985,ENSG00000118523,ENSG00000197565,ENSG00000117525,ENSG00000109321,ENSG00000154188,ENSG00000254087
GO:BP	response to lipid	GO:0033993	FALSE	7.16264e-05	4.144926622703583	930	231	31	21026	ENSG00000138772,ENSG00000044524,ENSG00000172572,ENSG00000196482,ENSG00000069535,ENSG00000136160,ENSG00000112293,ENSG00000178445,ENSG00000114115,ENSG00000163288,ENSG00000153283,ENSG00000114315,ENSG00000137801,ENSG00000125538,ENSG00000110090,ENSG00000114698,ENSG00000162711,ENSG00000081189,ENSG00000167332,ENSG00000091831,ENSG00000138061,ENSG00000136244,ENSG00000141448,ENSG00000175426,ENSG00000175175…
GO:BP	locomotion	GO:0040011	FALSE	7.34931e-05	4.133753721581235	1255	231	37	21026	ENSG00000126016,ENSG00000152580,ENSG00000138772,ENSG00000128052,ENSG00000011201,ENSG00000136160,ENSG00000112293,ENSG00000158856,ENSG00000136960,ENSG00000103888,ENSG00000104998,ENSG00000076706,ENSG00000102409,ENSG00000138798,ENSG00000137801,ENSG00000125538,ENSG00000178568,ENSG00000179546,ENSG00000081189,ENSG00000123610,ENSG00000184371,ENSG00000011465,ENSG00000179388,ENSG00000138061,ENSG00000136244…
GO:BP	enzyme-linked receptor protein signaling pathway	GO:0007167	FALSE	0.000184074	3.735008306192434	970	231	31	21026	ENSG00000044524,ENSG00000128052,ENSG00000112293,ENSG00000115380,ENSG00000164509,ENSG00000137261,ENSG00000114315,ENSG00000138798,ENSG00000137801,ENSG00000125538,ENSG00000120738,ENSG00000178568,ENSG00000104368,ENSG00000174808,ENSG00000123610,ENSG00000184371,ENSG00000106123,ENSG00000011465,ENSG00000141448,ENSG00000134363,ENSG00000156140,ENSG00000080224,ENSG00000141753,ENSG00000170873,ENSG00000182985…
GO:BP	response to xenobiotic stimulus	GO:0009410	FALSE	0.00083151	3.080132406333074	439	231	19	21026	ENSG00000172572,ENSG00000069535,ENSG00000112293,ENSG00000138109,ENSG00000126562,ENSG00000106688,ENSG00000137801,ENSG00000125538,ENSG00000110090,ENSG00000164342,ENSG00000081189,ENSG00000138061,ENSG00000166741,ENSG00000141448,ENSG00000175426,ENSG00000175175,ENSG00000148677,ENSG00000073756,ENSG00000254087
GO:BP	peptidyl-tyrosine phosphorylation	GO:0018108	TRUE	0.00084299	3.0741773726205004	239	231	14	21026	ENSG00000044524,ENSG00000128052,ENSG00000155307,ENSG00000115380,ENSG00000158856,ENSG00000136960,ENSG00000164509,ENSG00000114315,ENSG00000138798,ENSG00000178568,ENSG00000136244,ENSG00000109321,ENSG00000154188,ENSG00000254087
GO:BP	animal organ morphogenesis	GO:0009887	FALSE	0.000879084	3.055969608770978	1042	231	31	21026	ENSG00000168878,ENSG00000128052,ENSG00000101160,ENSG00000115380,ENSG00000187689,ENSG00000140297,ENSG00000138759,ENSG00000132470,ENSG00000126562,ENSG00000146021,ENSG00000163093,ENSG00000164128,ENSG00000106688,ENSG00000141449,ENSG00000114315,ENSG00000105997,ENSG00000178568,ENSG00000081189,ENSG00000091831,ENSG00000184371,ENSG00000011465,ENSG00000151090,ENSG00000136244,ENSG00000141448,ENSG00000134363…
GO:BP	peptidyl-tyrosine modification	GO:0018212	FALSE	0.000932212	3.030485518174186	241	231	14	21026	ENSG00000044524,ENSG00000128052,ENSG00000155307,ENSG00000115380,ENSG00000158856,ENSG00000136960,ENSG00000164509,ENSG00000114315,ENSG00000138798,ENSG00000178568,ENSG00000136244,ENSG00000109321,ENSG00000154188,ENSG00000254087
GO:BP	regulation of anatomical structure morphogenesis	GO:0022603	FALSE	0.000968982	3.013684452018187	831	231	27	21026	ENSG00000126016,ENSG00000138772,ENSG00000128052,ENSG00000154645,ENSG00000158856,ENSG00000124212,ENSG00000136960,ENSG00000137261,ENSG00000114315,ENSG00000138798,ENSG00000169860,ENSG00000137801,ENSG00000125538,ENSG00000164342,ENSG00000081189,ENSG00000091831,ENSG00000184371,ENSG00000011465,ENSG00000138061,ENSG00000136244,ENSG00000141448,ENSG00000124772,ENSG00000117525,ENSG00000136040,ENSG00000158769…
GO:BP	cell-cell signaling	GO:0007267	TRUE	0.00114633	2.9406906286724337	1342	231	36	21026	ENSG00000150394,ENSG00000069535,ENSG00000136160,ENSG00000152208,ENSG00000112293,ENSG00000126562,ENSG00000163288,ENSG00000106688,ENSG00000177839,ENSG00000173227,ENSG00000114315,ENSG00000153956,ENSG00000005249,ENSG00000114279,ENSG00000152578,ENSG00000169860,ENSG00000125538,ENSG00000179546,ENSG00000104368,ENSG00000110090,ENSG00000081189,ENSG00000167332,ENSG00000112294,ENSG00000123610,ENSG00000179388…
GO:BP	response to chemical	GO:0042221	FALSE	0.00115333	2.938046491326471	3909	231	74	21026	ENSG00000126016,ENSG00000138772,ENSG00000146477,ENSG00000173376,ENSG00000170373,ENSG00000044524,ENSG00000128052,ENSG00000172572,ENSG00000196482,ENSG00000011201,ENSG00000069535,ENSG00000136160,ENSG00000112293,ENSG00000185436,ENSG00000158856,ENSG00000124212,ENSG00000178445,ENSG00000136960,ENSG00000138109,ENSG00000104998,ENSG00000164509,ENSG00000114115,ENSG00000126562,ENSG00000163288,ENSG00000106688…
GO:BP	positive regulation of biological process	GO:0048518	FALSE	0.00121805	2.914335998115383	6264	231	104	21026	ENSG00000126016,ENSG00000077420,ENSG00000138772,ENSG00000051523,ENSG00000189221,ENSG00000179914,ENSG00000173376,ENSG00000044524,ENSG00000174482,ENSG00000143226,ENSG00000128052,ENSG00000183508,ENSG00000150625,ENSG00000172572,ENSG00000154645,ENSG00000196482,ENSG00000155629,ENSG00000069535,ENSG00000136160,ENSG00000152208,ENSG00000112293,ENSG00000185436,ENSG00000187689,ENSG00000158856,ENSG00000124212…
GO:BP	tissue development	GO:0009888	FALSE	0.00128754	2.8902401901256236	2032	231	47	21026	ENSG00000044524,ENSG00000055732,ENSG00000128052,ENSG00000101160,ENSG00000136160,ENSG00000112293,ENSG00000115380,ENSG00000187689,ENSG00000140297,ENSG00000138759,ENSG00000132470,ENSG00000164509,ENSG00000126562,ENSG00000146021,ENSG00000029559,ENSG00000163093,ENSG00000141449,ENSG00000114315,ENSG00000133454,ENSG00000105997,ENSG00000138798,ENSG00000125538,ENSG00000120738,ENSG00000178568,ENSG00000110090…
GO:BP	regulation of phosphate metabolic process	GO:0019220	FALSE	0.00144767	2.8393290353805742	956	231	29	21026	ENSG00000179914,ENSG00000128052,ENSG00000155307,ENSG00000112293,ENSG00000160326,ENSG00000158856,ENSG00000136960,ENSG00000103888,ENSG00000164509,ENSG00000122223,ENSG00000106688,ENSG00000114315,ENSG00000005249,ENSG00000138798,ENSG00000169860,ENSG00000137801,ENSG00000125538,ENSG00000178568,ENSG00000164342,ENSG00000081189,ENSG00000184371,ENSG00000135549,ENSG00000136244,ENSG00000120129,ENSG00000175175…
GO:BP	regulation of phosphorus metabolic process	GO:0051174	FALSE	0.00147862	2.8301437090831514	957	231	29	21026	ENSG00000179914,ENSG00000128052,ENSG00000155307,ENSG00000112293,ENSG00000160326,ENSG00000158856,ENSG00000136960,ENSG00000103888,ENSG00000164509,ENSG00000122223,ENSG00000106688,ENSG00000114315,ENSG00000005249,ENSG00000138798,ENSG00000169860,ENSG00000137801,ENSG00000125538,ENSG00000178568,ENSG00000164342,ENSG00000081189,ENSG00000184371,ENSG00000135549,ENSG00000136244,ENSG00000120129,ENSG00000175175…
GO:BP	regulation of multicellular organismal development	GO:2000026	FALSE	0.00152467	2.81682	1418	231	37	21026	ENSG00000126016,ENSG00000138772,ENSG00000174482,ENSG00000128052,ENSG00000154645,ENSG00000152208,ENSG00000115380,ENSG00000187689,ENSG00000124212,ENSG00000114115,ENSG00000137261,ENSG00000114315,ENSG00000138798,ENSG00000137801,ENSG00000125538,ENSG00000178568,ENSG00000162711,ENSG00000164342,ENSG00000081189,ENSG00000123610,ENSG00000184371,ENSG00000011465,ENSG00000179388,ENSG00000138061,ENSG00000136244…
GO:BP	cell junction assembly	GO:0034329	TRUE	0.00155003	2.809658990311184	503	231	20	21026	ENSG00000126016,ENSG00000044524,ENSG00000174482,ENSG00000128052,ENSG00000150625,ENSG00000150394,ENSG00000165379,ENSG00000152208,ENSG00000158856,ENSG00000132470,ENSG00000177839,ENSG00000137801,ENSG00000125538,ENSG00000174607,ENSG00000178568,ENSG00000081189,ENSG00000179542,ENSG00000272674,ENSG00000158769,ENSG00000047648
GO:BP	regulation of developmental process	GO:0050793	FALSE	0.00184378	2.734290115390243	2457	231	53	21026	ENSG00000126016,ENSG00000138772,ENSG00000044524,ENSG00000174482,ENSG00000128052,ENSG00000183508,ENSG00000172572,ENSG00000154645,ENSG00000136160,ENSG00000152208,ENSG00000115380,ENSG00000187689,ENSG00000158856,ENSG00000124212,ENSG00000136960,ENSG00000114115,ENSG00000164128,ENSG00000137261,ENSG00000114315,ENSG00000138798,ENSG00000169860,ENSG00000137801,ENSG00000125538,ENSG00000178568,ENSG00000162711…
GO:BP	negative regulation of plasminogen activation	GO:0010757	TRUE	0.00184602	2.733762429557651	8	231	4	21026	ENSG00000101160,ENSG00000137801,ENSG00000104368,ENSG00000106366
GO:BP	positive regulation of coagulation	GO:0050820	FALSE	0.00185424	2.7318347596442503	31	231	6	21026	ENSG00000137801,ENSG00000001561,ENSG00000104368,ENSG00000117525,ENSG00000154188,ENSG00000106366
GO:BP	cellular response to chemical stimulus	GO:0070887	FALSE	0.00191177	2.718565230712131	2192	231	49	21026	ENSG00000146477,ENSG00000173376,ENSG00000044524,ENSG00000128052,ENSG00000172572,ENSG00000196482,ENSG00000136160,ENSG00000112293,ENSG00000158856,ENSG00000124212,ENSG00000138109,ENSG00000126562,ENSG00000163288,ENSG00000106688,ENSG00000114315,ENSG00000153956,ENSG00000169860,ENSG00000137801,ENSG00000125538,ENSG00000120738,ENSG00000110090,ENSG00000114698,ENSG00000132793,ENSG00000162711,ENSG00000164342…
GO:BP	regulation of response to external stimulus	GO:0032101	FALSE	0.00195777	2.7082384620737487	1082	231	31	21026	ENSG00000051523,ENSG00000128052,ENSG00000155629,ENSG00000165379,ENSG00000136160,ENSG00000152208,ENSG00000185436,ENSG00000124212,ENSG00000137261,ENSG00000153283,ENSG00000137801,ENSG00000001561,ENSG00000125538,ENSG00000104368,ENSG00000110090,ENSG00000162711,ENSG00000164342,ENSG00000091831,ENSG00000123610,ENSG00000184371,ENSG00000136244,ENSG00000074966,ENSG00000141448,ENSG00000174600,ENSG00000120129…
GO:BP	positive regulation of cell migration	GO:0030335	FALSE	0.00203061	2.692372444643611	559	231	21	21026	ENSG00000126016,ENSG00000138772,ENSG00000128052,ENSG00000112293,ENSG00000158856,ENSG00000136960,ENSG00000103888,ENSG00000076706,ENSG00000138798,ENSG00000137801,ENSG00000125538,ENSG00000123610,ENSG00000184371,ENSG00000138061,ENSG00000136244,ENSG00000174600,ENSG00000117525,ENSG00000154188,ENSG00000073756,ENSG00000254087,ENSG00000106366
GO:BP	positive regulation of cellular process	GO:0048522	FALSE	0.00207982	2.681973813861667	5920	231	99	21026	ENSG00000126016,ENSG00000077420,ENSG00000138772,ENSG00000051523,ENSG00000189221,ENSG00000179914,ENSG00000173376,ENSG00000044524,ENSG00000174482,ENSG00000143226,ENSG00000128052,ENSG00000183508,ENSG00000150625,ENSG00000172572,ENSG00000154645,ENSG00000196482,ENSG00000155629,ENSG00000069535,ENSG00000136160,ENSG00000152208,ENSG00000112293,ENSG00000185436,ENSG00000158856,ENSG00000124212,ENSG00000136960…
GO:BP	positive regulation of phosphate metabolic process	GO:0045937	FALSE	0.00208938	2.6799820657732187	560	231	21	21026	ENSG00000179914,ENSG00000128052,ENSG00000112293,ENSG00000136960,ENSG00000103888,ENSG00000164509,ENSG00000122223,ENSG00000114315,ENSG00000138798,ENSG00000169860,ENSG00000137801,ENSG00000125538,ENSG00000178568,ENSG00000164342,ENSG00000081189,ENSG00000184371,ENSG00000136244,ENSG00000109321,ENSG00000154188,ENSG00000073756,ENSG00000254087
GO:BP	positive regulation of phosphorus metabolic process	GO:0010562	FALSE	0.00208938	2.6799820657732187	560	231	21	21026	ENSG00000179914,ENSG00000128052,ENSG00000112293,ENSG00000136960,ENSG00000103888,ENSG00000164509,ENSG00000122223,ENSG00000114315,ENSG00000138798,ENSG00000169860,ENSG00000137801,ENSG00000125538,ENSG00000178568,ENSG00000164342,ENSG00000081189,ENSG00000184371,ENSG00000136244,ENSG00000109321,ENSG00000154188,ENSG00000073756,ENSG00000254087
GO:BP	endothelial cell migration	GO:0043542	FALSE	0.00209134	2.6795752220506235	221	231	13	21026	ENSG00000126016,ENSG00000138772,ENSG00000128052,ENSG00000112293,ENSG00000138798,ENSG00000137801,ENSG00000081189,ENSG00000011465,ENSG00000179388,ENSG00000138061,ENSG00000197635,ENSG00000154188,ENSG00000073756
GO:BP	nephron development	GO:0072006	FALSE	0.00315067	2.5015968996820037	160	231	11	21026	ENSG00000136160,ENSG00000126562,ENSG00000146021,ENSG00000141449,ENSG00000114315,ENSG00000120738,ENSG00000178568,ENSG00000081189,ENSG00000170873,ENSG00000154188,ENSG00000101384
GO:BP	regulation of protein phosphorylation	GO:0001932	FALSE	0.00329863	2.4816662439560466	779	231	25	21026	ENSG00000179914,ENSG00000128052,ENSG00000155307,ENSG00000158856,ENSG00000136960,ENSG00000103888,ENSG00000164509,ENSG00000106688,ENSG00000114315,ENSG00000005249,ENSG00000138798,ENSG00000169860,ENSG00000137801,ENSG00000125538,ENSG00000178568,ENSG00000164342,ENSG00000184371,ENSG00000135549,ENSG00000136244,ENSG00000120129,ENSG00000175175,ENSG00000109321,ENSG00000154188,ENSG00000073756,ENSG00000254087
GO:BP	protein phosphorylation	GO:0006468	FALSE	0.00339772	2.4688119058153073	1227	231	33	21026	ENSG00000179914,ENSG00000044524,ENSG00000128052,ENSG00000155307,ENSG00000115380,ENSG00000158856,ENSG00000136960,ENSG00000103888,ENSG00000164509,ENSG00000126562,ENSG00000106688,ENSG00000114315,ENSG00000005249,ENSG00000138798,ENSG00000169860,ENSG00000137801,ENSG00000125538,ENSG00000178568,ENSG00000164342,ENSG00000184371,ENSG00000106123,ENSG00000135549,ENSG00000136244,ENSG00000074966,ENSG00000154358…
GO:BP	epithelial cell proliferation	GO:0050673	TRUE	0.00388943	2.410113963057852	441	231	18	21026	ENSG00000128052,ENSG00000136160,ENSG00000114315,ENSG00000138798,ENSG00000137801,ENSG00000081189,ENSG00000167332,ENSG00000091831,ENSG00000179388,ENSG00000136244,ENSG00000141448,ENSG00000134363,ENSG00000141753,ENSG00000170873,ENSG00000117525,ENSG00000145088,ENSG00000109321,ENSG00000101384
GO:BP	response to organophosphorus	GO:0046683	FALSE	0.00392895	2.4057231357626305	132	231	10	21026	ENSG00000172572,ENSG00000158856,ENSG00000138741,ENSG00000169860,ENSG00000125538,ENSG00000138061,ENSG00000141448,ENSG00000109321,ENSG00000073756,ENSG00000151320
GO:BP	response to oxygen-containing compound	GO:1901700	FALSE	0.00434422	2.3620885059159837	1669	231	40	21026	ENSG00000044524,ENSG00000172572,ENSG00000069535,ENSG00000136160,ENSG00000112293,ENSG00000158856,ENSG00000178445,ENSG00000114115,ENSG00000163288,ENSG00000106688,ENSG00000138741,ENSG00000153283,ENSG00000114315,ENSG00000153956,ENSG00000169860,ENSG00000137801,ENSG00000125538,ENSG00000120738,ENSG00000110090,ENSG00000114698,ENSG00000132793,ENSG00000162711,ENSG00000081189,ENSG00000167332,ENSG00000091831…
GO:BP	positive regulation of cell motility	GO:2000147	FALSE	0.00440033	2.3565143921978926	587	231	21	21026	ENSG00000126016,ENSG00000138772,ENSG00000128052,ENSG00000112293,ENSG00000158856,ENSG00000136960,ENSG00000103888,ENSG00000076706,ENSG00000138798,ENSG00000137801,ENSG00000125538,ENSG00000123610,ENSG00000184371,ENSG00000138061,ENSG00000136244,ENSG00000174600,ENSG00000117525,ENSG00000154188,ENSG00000073756,ENSG00000254087,ENSG00000106366
GO:BP	response to nitrogen compound	GO:1901698	FALSE	0.00556127	2.25483	1080	231	30	21026	ENSG00000172572,ENSG00000136160,ENSG00000112293,ENSG00000158856,ENSG00000178445,ENSG00000163288,ENSG00000106688,ENSG00000138741,ENSG00000114315,ENSG00000153956,ENSG00000169860,ENSG00000125538,ENSG00000120738,ENSG00000110090,ENSG00000132793,ENSG00000162711,ENSG00000164342,ENSG00000081189,ENSG00000100350,ENSG00000138061,ENSG00000136244,ENSG00000141448,ENSG00000175426,ENSG00000111885,ENSG00000109321…
GO:BP	cell communication	GO:0007154	FALSE	0.00572178	2.2424685326312863	6540	231	105	21026	ENSG00000126016,ENSG00000112541,ENSG00000077420,ENSG00000051523,ENSG00000189221,ENSG00000173376,ENSG00000044524,ENSG00000055732,ENSG00000143226,ENSG00000128052,ENSG00000172572,ENSG00000196482,ENSG00000155629,ENSG00000150394,ENSG00000168772,ENSG00000069535,ENSG00000153294,ENSG00000136160,ENSG00000152208,ENSG00000112293,ENSG00000115380,ENSG00000185436,ENSG00000124212,ENSG00000138759,ENSG00000132470…
GO:BP	inflammatory response	GO:0006954	FALSE	0.00628243	2.2018726671535545	862	231	26	21026	ENSG00000051523,ENSG00000143226,ENSG00000155629,ENSG00000165379,ENSG00000136160,ENSG00000124212,ENSG00000164509,ENSG00000126562,ENSG00000008516,ENSG00000153283,ENSG00000137801,ENSG00000125538,ENSG00000162711,ENSG00000164342,ENSG00000091831,ENSG00000123610,ENSG00000184371,ENSG00000106123,ENSG00000136244,ENSG00000174600,ENSG00000117525,ENSG00000073756,ENSG00000163661,ENSG00000158769,ENSG00000254087…
GO:BP	circulatory system process	GO:0003013	TRUE	0.00652253	2.1855838831590693	602	231	21	21026	ENSG00000126016,ENSG00000146477,ENSG00000172572,ENSG00000101160,ENSG00000136160,ENSG00000126562,ENSG00000164128,ENSG00000106688,ENSG00000153956,ENSG00000114279,ENSG00000169860,ENSG00000179546,ENSG00000166689,ENSG00000167332,ENSG00000092068,ENSG00000151090,ENSG00000141448,ENSG00000116016,ENSG00000154188,ENSG00000073756,ENSG00000148680
GO:BP	positive regulation of locomotion	GO:0040017	FALSE	0.00669267	2.1744004726072244	603	231	21	21026	ENSG00000126016,ENSG00000138772,ENSG00000128052,ENSG00000112293,ENSG00000158856,ENSG00000136960,ENSG00000103888,ENSG00000076706,ENSG00000138798,ENSG00000137801,ENSG00000125538,ENSG00000123610,ENSG00000184371,ENSG00000138061,ENSG00000136244,ENSG00000174600,ENSG00000117525,ENSG00000154188,ENSG00000073756,ENSG00000254087,ENSG00000106366
GO:BP	acute inflammatory response	GO:0002526	FALSE	0.00680763	2.1670041064612695	110	231	9	21026	ENSG00000143226,ENSG00000136160,ENSG00000164509,ENSG00000125538,ENSG00000162711,ENSG00000106123,ENSG00000136244,ENSG00000117525,ENSG00000073756
GO:BP	response to stress	GO:0006950	FALSE	0.00725527	2.139346243196693	3948	231	72	21026	ENSG00000138772,ENSG00000051523,ENSG00000181804,ENSG00000173376,ENSG00000143226,ENSG00000128052,ENSG00000155629,ENSG00000150394,ENSG00000165379,ENSG00000136160,ENSG00000185436,ENSG00000158856,ENSG00000124212,ENSG00000132470,ENSG00000172264,ENSG00000104998,ENSG00000164509,ENSG00000123405,ENSG00000126562,ENSG00000122223,ENSG00000008516,ENSG00000106688,ENSG00000076706,ENSG00000137261,ENSG00000138741…
GO:BP	regulation of body fluid levels	GO:0050878	FALSE	0.00863795	2.063589254153784	376	231	16	21026	ENSG00000051523,ENSG00000136160,ENSG00000123405,ENSG00000126562,ENSG00000169860,ENSG00000137801,ENSG00000001561,ENSG00000178568,ENSG00000104368,ENSG00000174808,ENSG00000105825,ENSG00000136244,ENSG00000117525,ENSG00000158769,ENSG00000254087,ENSG00000106366
GO:BP	chemotaxis	GO:0006935	FALSE	0.00864563	2.0632033937698533	467	231	18	21026	ENSG00000126016,ENSG00000128052,ENSG00000011201,ENSG00000136160,ENSG00000136960,ENSG00000137801,ENSG00000125538,ENSG00000123610,ENSG00000184371,ENSG00000179388,ENSG00000136244,ENSG00000174600,ENSG00000120129,ENSG00000197635,ENSG00000117525,ENSG00000154188,ENSG00000254087,ENSG00000106366
GO:BP	signaling	GO:0023052	FALSE	0.00891595	2.049832180473758	6515	231	104	21026	ENSG00000126016,ENSG00000112541,ENSG00000077420,ENSG00000051523,ENSG00000189221,ENSG00000173376,ENSG00000044524,ENSG00000055732,ENSG00000143226,ENSG00000128052,ENSG00000172572,ENSG00000196482,ENSG00000155629,ENSG00000150394,ENSG00000168772,ENSG00000069535,ENSG00000153294,ENSG00000136160,ENSG00000152208,ENSG00000112293,ENSG00000115380,ENSG00000185436,ENSG00000124212,ENSG00000132470,ENSG00000104998…
GO:BP	regulation of protein modification process	GO:0031399	FALSE	0.00906757	2.0425092655992367	1049	231	29	21026	ENSG00000179914,ENSG00000128052,ENSG00000155307,ENSG00000158856,ENSG00000136960,ENSG00000103888,ENSG00000164509,ENSG00000106688,ENSG00000114315,ENSG00000102409,ENSG00000005249,ENSG00000138798,ENSG00000169860,ENSG00000137801,ENSG00000125538,ENSG00000120738,ENSG00000178568,ENSG00000164342,ENSG00000184371,ENSG00000135549,ENSG00000136244,ENSG00000166741,ENSG00000120129,ENSG00000116016,ENSG00000175175…
GO:BP	taxis	GO:0042330	FALSE	0.00917069	2.0375977599497554	469	231	18	21026	ENSG00000126016,ENSG00000128052,ENSG00000011201,ENSG00000136160,ENSG00000136960,ENSG00000137801,ENSG00000125538,ENSG00000123610,ENSG00000184371,ENSG00000179388,ENSG00000136244,ENSG00000174600,ENSG00000120129,ENSG00000197635,ENSG00000117525,ENSG00000154188,ENSG00000254087,ENSG00000106366
GO:BP	defense response	GO:0006952	FALSE	0.00952374	2.021192511195284	1853	231	42	21026	ENSG00000138772,ENSG00000051523,ENSG00000181804,ENSG00000143226,ENSG00000155629,ENSG00000165379,ENSG00000136160,ENSG00000185436,ENSG00000124212,ENSG00000104998,ENSG00000164509,ENSG00000126562,ENSG00000122223,ENSG00000008516,ENSG00000106688,ENSG00000153283,ENSG00000137801,ENSG00000125538,ENSG00000110090,ENSG00000153930,ENSG00000162711,ENSG00000164342,ENSG00000081189,ENSG00000091831,ENSG00000123610…
GO:BP	blood circulation	GO:0008015	FALSE	0.00952954	2.0209282502072643	518	231	19	21026	ENSG00000126016,ENSG00000172572,ENSG00000101160,ENSG00000136160,ENSG00000126562,ENSG00000164128,ENSG00000106688,ENSG00000153956,ENSG00000114279,ENSG00000169860,ENSG00000179546,ENSG00000166689,ENSG00000167332,ENSG00000151090,ENSG00000141448,ENSG00000116016,ENSG00000154188,ENSG00000073756,ENSG00000148680
GO:BP	response to wounding	GO:0009611	FALSE	0.00980513	2.00855	568	231	20	21026	ENSG00000173376,ENSG00000128052,ENSG00000158856,ENSG00000132470,ENSG00000106688,ENSG00000076706,ENSG00000137261,ENSG00000169860,ENSG00000137801,ENSG00000001561,ENSG00000104368,ENSG00000164342,ENSG00000105825,ENSG00000136244,ENSG00000175426,ENSG00000118523,ENSG00000117525,ENSG00000158769,ENSG00000254087,ENSG00000106366
GO:BP	regulation of phosphorylation	GO:0042325	FALSE	0.0100714	1.9969103366475276	830	231	25	21026	ENSG00000179914,ENSG00000128052,ENSG00000155307,ENSG00000158856,ENSG00000136960,ENSG00000103888,ENSG00000164509,ENSG00000106688,ENSG00000114315,ENSG00000005249,ENSG00000138798,ENSG00000169860,ENSG00000137801,ENSG00000125538,ENSG00000178568,ENSG00000164342,ENSG00000184371,ENSG00000135549,ENSG00000136244,ENSG00000120129,ENSG00000175175,ENSG00000109321,ENSG00000154188,ENSG00000073756,ENSG00000254087
GO:BP	response to lipopolysaccharide	GO:0032496	FALSE	0.010823246625419844	1.9656424453285737	339	231	15	21026	ENSG00000069535,ENSG00000136160,ENSG00000153283,ENSG00000125538,ENSG00000114698,ENSG00000162711,ENSG00000081189,ENSG00000136244,ENSG00000175426,ENSG00000175175,ENSG00000148677,ENSG00000211448,ENSG00000073756,ENSG00000254087,ENSG00000106366
GO:BP	response to purine-containing compound	GO:0014074	FALSE	0.011004564189248705	1.9584271520158762	148	231	10	21026	ENSG00000172572,ENSG00000158856,ENSG00000138741,ENSG00000169860,ENSG00000125538,ENSG00000138061,ENSG00000141448,ENSG00000109321,ENSG00000073756,ENSG00000151320
GO:BP	blood vessel endothelial cell migration	GO:0043534	FALSE	0.013019927726738616	1.8853914265178826	119	231	9	21026	ENSG00000126016,ENSG00000128052,ENSG00000112293,ENSG00000137801,ENSG00000081189,ENSG00000179388,ENSG00000138061,ENSG00000154188,ENSG00000073756
GO:BP	positive regulation of protein phosphorylation	GO:0001934	FALSE	0.013727172428928605	1.8624189110501008	483	231	18	21026	ENSG00000179914,ENSG00000128052,ENSG00000136960,ENSG00000103888,ENSG00000164509,ENSG00000114315,ENSG00000138798,ENSG00000169860,ENSG00000137801,ENSG00000125538,ENSG00000178568,ENSG00000164342,ENSG00000184371,ENSG00000136244,ENSG00000109321,ENSG00000154188,ENSG00000073756,ENSG00000254087
GO:BP	regulation of cell adhesion	GO:0030155	FALSE	0.014827802771084909	1.8289231992812085	794	231	24	21026	ENSG00000077420,ENSG00000173376,ENSG00000044524,ENSG00000128052,ENSG00000158856,ENSG00000029559,ENSG00000114315,ENSG00000137801,ENSG00000125538,ENSG00000162711,ENSG00000184371,ENSG00000106123,ENSG00000179388,ENSG00000138061,ENSG00000136244,ENSG00000120129,ENSG00000197635,ENSG00000136040,ENSG00000154188,ENSG00000158769,ENSG00000047648,ENSG00000101384,ENSG00000254087,ENSG00000106366
GO:BP	phosphorylation	GO:0016310	FALSE	0.015992969239134455	1.7960708980762647	1320	231	33	21026	ENSG00000179914,ENSG00000044524,ENSG00000128052,ENSG00000155307,ENSG00000115380,ENSG00000158856,ENSG00000136960,ENSG00000103888,ENSG00000164509,ENSG00000126562,ENSG00000106688,ENSG00000114315,ENSG00000005249,ENSG00000138798,ENSG00000169860,ENSG00000137801,ENSG00000125538,ENSG00000178568,ENSG00000164342,ENSG00000184371,ENSG00000106123,ENSG00000135549,ENSG00000136244,ENSG00000074966,ENSG00000154358…
GO:BP	regulation of leukocyte chemotaxis	GO:0002688	FALSE	0.0182157	1.7395551179169513	124	231	9	21026	ENSG00000137801,ENSG00000123610,ENSG00000184371,ENSG00000136244,ENSG00000174600,ENSG00000120129,ENSG00000197635,ENSG00000254087,ENSG00000106366
GO:BP	cell differentiation	GO:0030154	FALSE	0.018763024527660575	1.7266971537075297	4437	231	77	21026	ENSG00000126016,ENSG00000078596,ENSG00000152580,ENSG00000173376,ENSG00000044524,ENSG00000055732,ENSG00000128052,ENSG00000183508,ENSG00000150625,ENSG00000172572,ENSG00000154645,ENSG00000011201,ENSG00000136160,ENSG00000152208,ENSG00000112293,ENSG00000115380,ENSG00000183715,ENSG00000158856,ENSG00000132470,ENSG00000164509,ENSG00000114115,ENSG00000163288,ENSG00000029559,ENSG00000106688,ENSG00000137261…
GO:BP	cellular developmental process	GO:0048869	FALSE	0.018922647679308055	1.7230180966834954	4438	231	77	21026	ENSG00000126016,ENSG00000078596,ENSG00000152580,ENSG00000173376,ENSG00000044524,ENSG00000055732,ENSG00000128052,ENSG00000183508,ENSG00000150625,ENSG00000172572,ENSG00000154645,ENSG00000011201,ENSG00000136160,ENSG00000152208,ENSG00000112293,ENSG00000115380,ENSG00000183715,ENSG00000158856,ENSG00000132470,ENSG00000164509,ENSG00000114115,ENSG00000163288,ENSG00000029559,ENSG00000106688,ENSG00000137261…
GO:BP	positive regulation of blood coagulation	GO:0030194	FALSE	0.019534586099603988	1.7092	27	231	5	21026	ENSG00000137801,ENSG00000001561,ENSG00000104368,ENSG00000117525,ENSG00000106366
GO:BP	positive regulation of hemostasis	GO:1900048	FALSE	0.019534586099603988	1.7092	27	231	5	21026	ENSG00000137801,ENSG00000001561,ENSG00000104368,ENSG00000117525,ENSG00000106366
GO:BP	response to molecule of bacterial origin	GO:0002237	FALSE	0.0200776	1.6972884079722188	357	231	15	21026	ENSG00000069535,ENSG00000136160,ENSG00000153283,ENSG00000125538,ENSG00000114698,ENSG00000162711,ENSG00000081189,ENSG00000136244,ENSG00000175426,ENSG00000175175,ENSG00000148677,ENSG00000211448,ENSG00000073756,ENSG00000254087,ENSG00000106366
GO:BP	monoatomic ion transport	GO:0006811	TRUE	0.022973065466214707	1.6387810498100264	1282	231	32	21026	ENSG00000051523,ENSG00000181804,ENSG00000146477,ENSG00000198515,ENSG00000055732,ENSG00000130433,ENSG00000150625,ENSG00000154864,ENSG00000069535,ENSG00000136160,ENSG00000152208,ENSG00000103888,ENSG00000147614,ENSG00000126562,ENSG00000146021,ENSG00000163288,ENSG00000106688,ENSG00000083067,ENSG00000138741,ENSG00000114315,ENSG00000153956,ENSG00000114279,ENSG00000138798,ENSG00000152578,ENSG00000169860…
GO:BP	positive regulation of cellular component organization	GO:0051130	FALSE	0.0243494	1.613510950619111	1105	231	29	21026	ENSG00000126016,ENSG00000051523,ENSG00000173376,ENSG00000044524,ENSG00000174482,ENSG00000143226,ENSG00000128052,ENSG00000150625,ENSG00000154645,ENSG00000152208,ENSG00000136960,ENSG00000139737,ENSG00000138798,ENSG00000125538,ENSG00000174808,ENSG00000135549,ENSG00000011465,ENSG00000136244,ENSG00000179542,ENSG00000163431,ENSG00000170873,ENSG00000163536,ENSG00000118523,ENSG00000175175,ENSG00000136040…
GO:BP	glomerulus development	GO:0032835	FALSE	0.024826	1.6050925290778353	71	231	7	21026	ENSG00000136160,ENSG00000114315,ENSG00000120738,ENSG00000081189,ENSG00000170873,ENSG00000154188,ENSG00000101384
GO:BP	positive regulation of phosphorylation	GO:0042327	FALSE	0.025749555479741913	1.5892302638795486	506	231	18	21026	ENSG00000179914,ENSG00000128052,ENSG00000136960,ENSG00000103888,ENSG00000164509,ENSG00000114315,ENSG00000138798,ENSG00000169860,ENSG00000137801,ENSG00000125538,ENSG00000178568,ENSG00000164342,ENSG00000184371,ENSG00000136244,ENSG00000109321,ENSG00000154188,ENSG00000073756,ENSG00000254087
GO:BP	regulation of hormone levels	GO:0010817	FALSE	0.025892006986947415	1.5868342844599044	556	231	19	21026	ENSG00000101160,ENSG00000136160,ENSG00000112293,ENSG00000138109,ENSG00000114115,ENSG00000126562,ENSG00000169860,ENSG00000125538,ENSG00000120738,ENSG00000110090,ENSG00000091831,ENSG00000092068,ENSG00000138061,ENSG00000136244,ENSG00000112394,ENSG00000175426,ENSG00000197635,ENSG00000211448,ENSG00000254087
GO:BP	cellular response to lipid	GO:0071396	FALSE	0.0298547	1.5249869312222333	613	231	20	21026	ENSG00000044524,ENSG00000172572,ENSG00000196482,ENSG00000136160,ENSG00000112293,ENSG00000114315,ENSG00000125538,ENSG00000110090,ENSG00000114698,ENSG00000162711,ENSG00000081189,ENSG00000167332,ENSG00000091831,ENSG00000138061,ENSG00000136244,ENSG00000175175,ENSG00000148677,ENSG00000073756,ENSG00000254087,ENSG00000106366
GO:BP	positive regulation of angiogenesis	GO:0045766	FALSE	0.0302264	1.5196132930899477	166	231	10	21026	ENSG00000138772,ENSG00000128052,ENSG00000124212,ENSG00000137801,ENSG00000125538,ENSG00000164342,ENSG00000138061,ENSG00000141448,ENSG00000117525,ENSG00000106366
GO:BP	tissue morphogenesis	GO:0048729	FALSE	0.030562	1.514818659266487	614	231	20	21026	ENSG00000128052,ENSG00000101160,ENSG00000140297,ENSG00000138759,ENSG00000132470,ENSG00000126562,ENSG00000146021,ENSG00000163093,ENSG00000141449,ENSG00000114315,ENSG00000138798,ENSG00000178568,ENSG00000081189,ENSG00000091831,ENSG00000184371,ENSG00000134363,ENSG00000170873,ENSG00000148677,ENSG00000109321,ENSG00000101384
GO:BP	response to endogenous stimulus	GO:0009719	FALSE	0.031047349997880884	1.507975462489394	1489	231	35	21026	ENSG00000138772,ENSG00000173376,ENSG00000128052,ENSG00000172572,ENSG00000196482,ENSG00000069535,ENSG00000136160,ENSG00000112293,ENSG00000163288,ENSG00000029559,ENSG00000114315,ENSG00000169860,ENSG00000137801,ENSG00000125538,ENSG00000120738,ENSG00000178568,ENSG00000132793,ENSG00000081189,ENSG00000167332,ENSG00000091831,ENSG00000123610,ENSG00000011465,ENSG00000179388,ENSG00000151090,ENSG00000138061…
GO:BP	cell junction organization	GO:0034330	FALSE	0.033298397976114814	1.4775766603936684	834	231	24	21026	ENSG00000126016,ENSG00000044524,ENSG00000174482,ENSG00000128052,ENSG00000150625,ENSG00000150394,ENSG00000165379,ENSG00000152208,ENSG00000158856,ENSG00000132470,ENSG00000106688,ENSG00000177839,ENSG00000137801,ENSG00000125538,ENSG00000174607,ENSG00000178568,ENSG00000166689,ENSG00000081189,ENSG00000179542,ENSG00000170873,ENSG00000272674,ENSG00000136040,ENSG00000158769,ENSG00000047648
GO:BP	regulation of endothelial cell migration	GO:0010594	FALSE	0.035312112168917546	1.4520763046438905	169	231	10	21026	ENSG00000126016,ENSG00000138772,ENSG00000128052,ENSG00000112293,ENSG00000138798,ENSG00000137801,ENSG00000081189,ENSG00000011465,ENSG00000154188,ENSG00000073756
GO:BP	positive regulation of vasculature development	GO:1904018	FALSE	0.035312112168917546	1.4520763046438905	169	231	10	21026	ENSG00000138772,ENSG00000128052,ENSG00000124212,ENSG00000137801,ENSG00000125538,ENSG00000164342,ENSG00000138061,ENSG00000141448,ENSG00000117525,ENSG00000106366
GO:BP	response to bacterium	GO:0009617	FALSE	0.0362985	1.440111065783948	728	231	22	21026	ENSG00000138772,ENSG00000051523,ENSG00000181804,ENSG00000150625,ENSG00000069535,ENSG00000136160,ENSG00000172264,ENSG00000104998,ENSG00000153283,ENSG00000125538,ENSG00000114698,ENSG00000162711,ENSG00000164342,ENSG00000081189,ENSG00000136244,ENSG00000175426,ENSG00000175175,ENSG00000148677,ENSG00000211448,ENSG00000073756,ENSG00000254087,ENSG00000106366
GO:BP	cytokine production	GO:0001816	FALSE	0.039510186475801706	1.4032909205787265	787	231	23	21026	ENSG00000051523,ENSG00000143226,ENSG00000104998,ENSG00000122223,ENSG00000153283,ENSG00000137801,ENSG00000125538,ENSG00000120738,ENSG00000162711,ENSG00000164342,ENSG00000138061,ENSG00000136244,ENSG00000074966,ENSG00000141448,ENSG00000174600,ENSG00000156140,ENSG00000182985,ENSG00000117525,ENSG00000154188,ENSG00000073756,ENSG00000158769,ENSG00000254087,ENSG00000106366
GO:BP	regulation of chemotaxis	GO:0050920	FALSE	0.0404664	1.3929055474225904	209	231	11	21026	ENSG00000128052,ENSG00000137801,ENSG00000123610,ENSG00000184371,ENSG00000136244,ENSG00000174600,ENSG00000120129,ENSG00000197635,ENSG00000117525,ENSG00000254087,ENSG00000106366
GO:BP	regulation of angiogenesis	GO:0045765	FALSE	0.0446636	1.3500464917666932	293	231	13	21026	ENSG00000126016,ENSG00000138772,ENSG00000128052,ENSG00000124212,ENSG00000137801,ENSG00000125538,ENSG00000164342,ENSG00000011465,ENSG00000138061,ENSG00000136244,ENSG00000141448,ENSG00000117525,ENSG00000106366
GO:BP	positive regulation of endothelial cell migration	GO:0010595	FALSE	0.0463021	1.3343993238335103	107	231	8	21026	ENSG00000126016,ENSG00000138772,ENSG00000128052,ENSG00000112293,ENSG00000138798,ENSG00000137801,ENSG00000154188,ENSG00000073756
GO:BP	cell surface receptor signaling pathway	GO:0007166	FALSE	0.0481933	1.3170137776973743	2819	231	54	21026	ENSG00000051523,ENSG00000044524,ENSG00000143226,ENSG00000128052,ENSG00000155629,ENSG00000168772,ENSG00000153294,ENSG00000136160,ENSG00000152208,ENSG00000112293,ENSG00000115380,ENSG00000185436,ENSG00000132470,ENSG00000104998,ENSG00000164509,ENSG00000106688,ENSG00000137261,ENSG00000114315,ENSG00000138798,ENSG00000152578,ENSG00000169860,ENSG00000137801,ENSG00000125538,ENSG00000120738,ENSG00000178568…
GO:CC	cell periphery	GO:0071944	TRUE	1.4791462029138906e-11	10.829988897010125	6347	242	125	22149	ENSG00000126016,ENSG00000078596,ENSG00000077420,ENSG00000138772,ENSG00000051523,ENSG00000181804,ENSG00000146477,ENSG00000198515,ENSG00000179914,ENSG00000173376,ENSG00000044524,ENSG00000174482,ENSG00000055732,ENSG00000130433,ENSG00000143226,ENSG00000128052,ENSG00000150625,ENSG00000154864,ENSG00000101160,ENSG00000155629,ENSG00000150394,ENSG00000011201,ENSG00000165379,ENSG00000136160,ENSG00000152208…
GO:CC	plasma membrane	GO:0005886	FALSE	1.0203028015617912e-8	7.991270920854078	5866	242	112	22149	ENSG00000126016,ENSG00000078596,ENSG00000077420,ENSG00000138772,ENSG00000051523,ENSG00000181804,ENSG00000146477,ENSG00000198515,ENSG00000179914,ENSG00000044524,ENSG00000174482,ENSG00000055732,ENSG00000130433,ENSG00000143226,ENSG00000128052,ENSG00000150625,ENSG00000154864,ENSG00000101160,ENSG00000155629,ENSG00000150394,ENSG00000011201,ENSG00000165379,ENSG00000136160,ENSG00000152208,ENSG00000185436…
GO:CC	membrane	GO:0016020	FALSE	2.0979674497224283e-8	7.678201254233785	9953	242	159	22149	ENSG00000126016,ENSG00000078596,ENSG00000120594,ENSG00000261115,ENSG00000077420,ENSG00000138772,ENSG00000051523,ENSG00000168878,ENSG00000181804,ENSG00000146477,ENSG00000189221,ENSG00000198515,ENSG00000179914,ENSG00000044524,ENSG00000174482,ENSG00000055732,ENSG00000130433,ENSG00000143226,ENSG00000128052,ENSG00000150625,ENSG00000172572,ENSG00000184867,ENSG00000154864,ENSG00000101160,ENSG00000154645…
GO:CC	extracellular matrix	GO:0031012	FALSE	2.4662988990207484e-7	6.607954290948327	559	242	26	22149	ENSG00000173376,ENSG00000174482,ENSG00000101160,ENSG00000011201,ENSG00000112293,ENSG00000115380,ENSG00000187689,ENSG00000138759,ENSG00000132470,ENSG00000008516,ENSG00000188488,ENSG00000137801,ENSG00000156218,ENSG00000164342,ENSG00000105825,ENSG00000011465,ENSG00000156140,ENSG00000185761,ENSG00000118523,ENSG00000196104,ENSG00000197565,ENSG00000117525,ENSG00000111341,ENSG00000154188,ENSG00000163661…
GO:CC	external encapsulating structure	GO:0030312	FALSE	2.561703052469591e-7	6.591471214227606	560	242	26	22149	ENSG00000173376,ENSG00000174482,ENSG00000101160,ENSG00000011201,ENSG00000112293,ENSG00000115380,ENSG00000187689,ENSG00000138759,ENSG00000132470,ENSG00000008516,ENSG00000188488,ENSG00000137801,ENSG00000156218,ENSG00000164342,ENSG00000105825,ENSG00000011465,ENSG00000156140,ENSG00000185761,ENSG00000118523,ENSG00000196104,ENSG00000197565,ENSG00000117525,ENSG00000111341,ENSG00000154188,ENSG00000163661…
GO:CC	extracellular region	GO:0005576	TRUE	2.7914935459111824e-7	6.554163371925463	4258	242	87	22149	ENSG00000152580,ENSG00000138772,ENSG00000168878,ENSG00000179914,ENSG00000173376,ENSG00000170373,ENSG00000044524,ENSG00000174482,ENSG00000176978,ENSG00000128052,ENSG00000150625,ENSG00000104833,ENSG00000101160,ENSG00000150394,ENSG00000011201,ENSG00000112293,ENSG00000115380,ENSG00000144908,ENSG00000187689,ENSG00000183715,ENSG00000124212,ENSG00000140297,ENSG00000104870,ENSG00000136960,ENSG00000103888…
GO:CC	extracellular space	GO:0005615	FALSE	1.82121e-05	4.7396394340449195	3315	242	69	22149	ENSG00000138772,ENSG00000179914,ENSG00000173376,ENSG00000170373,ENSG00000174482,ENSG00000176978,ENSG00000150625,ENSG00000104833,ENSG00000101160,ENSG00000011201,ENSG00000112293,ENSG00000115380,ENSG00000144908,ENSG00000124212,ENSG00000140297,ENSG00000104870,ENSG00000136960,ENSG00000132470,ENSG00000181523,ENSG00000147614,ENSG00000029559,ENSG00000008516,ENSG00000106688,ENSG00000076706,ENSG00000188488…
GO:CC	cell junction	GO:0030054	TRUE	7.55804e-05	4.1215909740980505	2401	242	54	22149	ENSG00000126016,ENSG00000154553,ENSG00000077420,ENSG00000146477,ENSG00000174482,ENSG00000055813,ENSG00000128052,ENSG00000150625,ENSG00000120262,ENSG00000150394,ENSG00000165379,ENSG00000152208,ENSG00000187689,ENSG00000158856,ENSG00000132470,ENSG00000164509,ENSG00000175161,ENSG00000126562,ENSG00000163288,ENSG00000106688,ENSG00000076706,ENSG00000177839,ENSG00000173227,ENSG00000153956,ENSG00000005249…
GO:CC	bounding membrane of organelle	GO:0098588	TRUE	0.00190882	2.719235499383552	2251	242	48	22149	ENSG00000138772,ENSG00000051523,ENSG00000181804,ENSG00000146477,ENSG00000189221,ENSG00000198515,ENSG00000055732,ENSG00000143226,ENSG00000184867,ENSG00000101160,ENSG00000069535,ENSG00000112293,ENSG00000160326,ENSG00000158856,ENSG00000140297,ENSG00000104870,ENSG00000103888,ENSG00000128274,ENSG00000119514,ENSG00000147614,ENSG00000148288,ENSG00000163093,ENSG00000008516,ENSG00000106688,ENSG00000137261…
GO:CC	endomembrane system	GO:0012505	TRUE	0.00291873	2.53481	4872	242	83	22149	ENSG00000078596,ENSG00000138772,ENSG00000051523,ENSG00000168878,ENSG00000181804,ENSG00000146477,ENSG00000044524,ENSG00000176978,ENSG00000055732,ENSG00000143226,ENSG00000128052,ENSG00000120262,ENSG00000101160,ENSG00000154645,ENSG00000136160,ENSG00000187689,ENSG00000158856,ENSG00000124212,ENSG00000140297,ENSG00000104870,ENSG00000103888,ENSG00000132470,ENSG00000138109,ENSG00000128274,ENSG00000119514…
GO:CC	endocytic vesicle	GO:0030139	FALSE	0.00340356	2.4680665447445804	351	242	15	22149	ENSG00000126016,ENSG00000138772,ENSG00000051523,ENSG00000168878,ENSG00000181804,ENSG00000103888,ENSG00000147614,ENSG00000137261,ENSG00000138798,ENSG00000152578,ENSG00000174808,ENSG00000170873,ENSG00000197635,ENSG00000109321,ENSG00000254087
GO:CC	plasma membrane region	GO:0098590	FALSE	0.00996295	2.0016121288199096	1332	242	32	22149	ENSG00000146477,ENSG00000198515,ENSG00000179914,ENSG00000174482,ENSG00000150625,ENSG00000150394,ENSG00000165379,ENSG00000152208,ENSG00000158856,ENSG00000124212,ENSG00000132470,ENSG00000164509,ENSG00000147614,ENSG00000163288,ENSG00000163093,ENSG00000106688,ENSG00000153956,ENSG00000152578,ENSG00000169860,ENSG00000178568,ENSG00000135525,ENSG00000110628,ENSG00000092068,ENSG00000111052,ENSG00000112394…
GO:CC	serine protease inhibitor complex	GO:0097180	TRUE	0.010565987320342201	1.9760899148215874	6	242	3	22149	ENSG00000188488,ENSG00000104368,ENSG00000106366
GO:CC	vesicle	GO:0031982	TRUE	0.022347237468567233	1.6507761560358498	4033	242	69	22149	ENSG00000126016,ENSG00000138772,ENSG00000051523,ENSG00000168878,ENSG00000181804,ENSG00000179914,ENSG00000170373,ENSG00000044524,ENSG00000176978,ENSG00000055732,ENSG00000143226,ENSG00000128052,ENSG00000150625,ENSG00000104833,ENSG00000101160,ENSG00000112293,ENSG00000115380,ENSG00000144908,ENSG00000158856,ENSG00000140297,ENSG00000104870,ENSG00000103888,ENSG00000132470,ENSG00000109511,ENSG00000181523…
GO:CC	synapse	GO:0045202	FALSE	0.0272425	1.5647535604461857	1665	242	36	22149	ENSG00000126016,ENSG00000146477,ENSG00000174482,ENSG00000150625,ENSG00000150394,ENSG00000165379,ENSG00000152208,ENSG00000158856,ENSG00000164509,ENSG00000175161,ENSG00000163288,ENSG00000106688,ENSG00000177839,ENSG00000173227,ENSG00000153956,ENSG00000005249,ENSG00000114279,ENSG00000152578,ENSG00000169860,ENSG00000178568,ENSG00000179546,ENSG00000104368,ENSG00000081189,ENSG00000112294,ENSG00000179388…
GO:CC	protease inhibitor complex	GO:0097179	FALSE	0.029108630676710743	1.5359782240883582	8	242	3	22149	ENSG00000188488,ENSG00000104368,ENSG00000106366
GO:CC	cell-cell junction	GO:0005911	TRUE	0.030631587303381096	1.513830497831421	526	242	17	22149	ENSG00000126016,ENSG00000154553,ENSG00000055813,ENSG00000150394,ENSG00000187689,ENSG00000126562,ENSG00000166689,ENSG00000163531,ENSG00000154358,ENSG00000111052,ENSG00000168899,ENSG00000182985,ENSG00000197635,ENSG00000158769,ENSG00000151320,ENSG00000101384,ENSG00000254087
GO:CC	endocytic vesicle membrane	GO:0030666	FALSE	0.038116089037821474	1.4188916672265028	205	242	10	22149	ENSG00000138772,ENSG00000051523,ENSG00000181804,ENSG00000147614,ENSG00000137261,ENSG00000138798,ENSG00000152578,ENSG00000174808,ENSG00000109321,ENSG00000254087
KEGG	Serotonergic synapse	KEGG:04726	FALSE	0.015042982198278747	1.8226660584339318	112	118	8	8484	ENSG00000189221,ENSG00000069535,ENSG00000138109,ENSG00000163288,ENSG00000179546,ENSG00000120129,ENSG00000073756,ENSG00000148680
WP	Prostaglandin signaling	WP:WP5088	FALSE	0.0250459	1.6012637291704994	33	133	5	8752	ENSG00000125538,ENSG00000162711,ENSG00000184371,ENSG00000136244,ENSG00000109321
WP	STING pathway in Kawasaki like disease and COVID 19	WP:WP4961	FALSE	0.0493283	1.3069035740427912	21	133	4	8752	ENSG00000143226,ENSG00000125538,ENSG00000162711,ENSG00000117525
TF	Factor: Blimp-1; motif: NACTTTCAC; match class: 1	TF:M04731_1	FALSE	0.029251376303782075	1.5338536951518487	480	249	19	20092	ENSG00000179914,ENSG00000104870,ENSG00000106688,ENSG00000114315,ENSG00000105997,ENSG00000178568,ENSG00000179546,ENSG00000104368,ENSG00000164342,ENSG00000184371,ENSG00000105825,ENSG00000141448,ENSG00000127329,ENSG00000100342,ENSG00000152137,ENSG00000118855,ENSG00000197635,ENSG00000145088,ENSG00000136040
TF	Factor: IRF; motif: NNGAAANTGAAANN	TF:M08887	FALSE	0.0451508	1.345334937592551	1310	249	35	20092	ENSG00000181804,ENSG00000147082,ENSG00000183508,ENSG00000150625,ENSG00000183549,ENSG00000115380,ENSG00000256683,ENSG00000130224,ENSG00000106560,ENSG00000146021,ENSG00000163093,ENSG00000177839,ENSG00000083067,ENSG00000138741,ENSG00000133454,ENSG00000005108,ENSG00000104368,ENSG00000166689,ENSG00000153930,ENSG00000164342,ENSG00000167332,ENSG00000184371,ENSG00000198203,ENSG00000105825,ENSG00000135549…
HPA	Kidney; proximal tubules (cell body)[â‰¥Medium]	HPA:0271142	FALSE	0.0090765	2.0420817938150018	567	152	21	10995	ENSG00000112541,ENSG00000077420,ENSG00000189221,ENSG00000176978,ENSG00000155629,ENSG00000069535,ENSG00000144908,ENSG00000140297,ENSG00000178445,ENSG00000172264,ENSG00000181523,ENSG00000119514,ENSG00000083067,ENSG00000174607,ENSG00000112294,ENSG00000135525,ENSG00000092068,ENSG00000106853,ENSG00000197635,ENSG00000158769,ENSG00000146038
HPA	Kidney; distal tubules[â‰¥Low]	HPA:0271131	FALSE	0.00914399	2.0388644598720034	704	152	24	10995	ENSG00000077420,ENSG00000138772,ENSG00000189221,ENSG00000176978,ENSG00000184867,ENSG00000069535,ENSG00000144908,ENSG00000140297,ENSG00000178445,ENSG00000172264,ENSG00000181523,ENSG00000119514,ENSG00000147614,ENSG00000106688,ENSG00000076706,ENSG00000174607,ENSG00000112294,ENSG00000135525,ENSG00000106853,ENSG00000182985,ENSG00000145088,ENSG00000158769,ENSG00000151320,ENSG00000146038
HPA	Kidney; proximal tubules (cell body)[â‰¥Low]	HPA:0271141	FALSE	0.015622228438718447	1.8062570159382705	728	152	24	10995	ENSG00000126016,ENSG00000112541,ENSG00000077420,ENSG00000138772,ENSG00000189221,ENSG00000176978,ENSG00000155629,ENSG00000069535,ENSG00000144908,ENSG00000140297,ENSG00000178445,ENSG00000172264,ENSG00000181523,ENSG00000119514,ENSG00000083067,ENSG00000174607,ENSG00000112294,ENSG00000135525,ENSG00000092068,ENSG00000106853,ENSG00000197635,ENSG00000158769,ENSG00000151320,ENSG00000146038
