# Supplementary material for: Chronic PFOA and PFOS exposure triggers cellular oxidative stress and alters lipid levels as revealed through multi-omics analysis
Source: Royal Society of Chemistry journal article supplement (doi:10.1039/d5va00353a), 2026-02-25
Supplement: d5va00353a5.xlsx [file d5va00353a5.xlsx]

## Sheet: TableS3
Table S3	Targeted lipidomics of PFOA and PFOS-treated cells.
Refer to Figure 4	Heatmap representation of lipidomic alterations in hTERT RPE-1 cells following prolonged PFOA and PFOS exposure.
Relative Abundance (RA)	calculated by dividing individual abundances by the average of each corresponding time point vehicle (MeOH) control
p-value	<0.05
	<0.01
	PFOA																																					PFOS
	Fatty Acids (FA)				24H								7W								17W								24W									Fatty Acids (FA)				24H
			Species	m/z	RA						log2(FC)	p-value	RA						log2(FC)	p-value	RA						log2(FC)	p-value	RA						log2(FC)	p-value				Species	m/z	RA						log2(FC)	p-value
					MeOH_1	MeOH_2	MeOH_3	PFOA_1	PFOA_2	PFOA_3			MeOH_1	MeOH_2	MeOH_3	PFOA_1	PFOA_2	PFOA_3			MeOH_1	MeOH_2	MeOH_3	PFOA_1	PFOA_2	PFOA_3			MeOH_1	MeOH_2	MeOH_3	PFOA_1	PFOA_2	PFOA_3								MeOH_1	MeOH_2	MeOH_3	PFOS_1	PFOS_2	PFOS_3
		FA	C12:0	199.17	0.971209	0.971923	1.05687	0.811403	0.937706	0.973998	-0.139709	0.180051	1.72666	0.576466	0.696873	0.782755	0.662898	0.639103	-0.525084	0.453337	0.856149	1.01808	1.12577	0.713547	0.981038	1.24451	-0.0295916	0.911801	1.03701	0.94036	1.02264	0.940329	1.04842	1.07656	0.0310717	0.693057			FA	C12:0	199.17	0.980955	0.934539	1.08451	0.857753	1.1652	1.21327	0.109352	0.547084
			C14:0	227.202	1.02451	0.957347	1.01814	0.814166	0.872336	0.920572	-0.202531	0.0250112	1.017	0.918035	1.06496	1.13156	0.852485	0.961107	-0.0266197	0.852207	0.986741	1.05335	0.959908	0.87868	1.28503	1.09075	0.117456	0.520583	1.08758	0.920373	0.992047	0.846202	1.01143	0.974954	-0.0828447	0.468143				C14:0	227.202	0.979223	0.995128	1.02565	0.880548	1.01096	1.47472	0.166169	0.536592
			C16:0	255.233	0.952616	1.03736	1.01002	0.928632	0.947113	0.89528	-0.114543	0.0592749	1.03398	0.908587	1.05743	1.09965	0.931157	1.02667	0.027379	0.789696	0.963428	0.999779	1.03679	1.03865	1.30327	0.880121	0.103012	0.586288	1.08862	0.976846	0.93453	0.946437	1.06957	1.0349	0.0242763	0.787205				C16:0	255.233	0.909764	1.01593	1.07431	0.922148	0.970928	1.55782	0.202009	0.513441
			C16:1	253.217	1.01003	0.93361	1.05636	1.22571	1.00372	1.89067	0.457718	0.237251	0.981253	1.02931	0.989438	1.22879	1.19835	1.06413	0.218789	0.0359955	1.06793	1.0642	0.867874	0.924109	1.56554	1.05848	0.242095	0.425594	1.23921	0.892764	0.868024	1.01524	1.51625	1.14278	0.292492	0.307257				C16:1	253.217	0.796745	1.34548	0.857773	1.09929	1.03672	1.09117	0.105306	0.687118
			C18:0	283.264	0.875802	1.07314	1.05106	0.961379	0.997087	0.939926	-0.0497099	0.627851	1.0137	0.916325	1.06998	1.04493	0.965621	1.02648	0.0176991	0.820235	1.06279	0.973974	0.963232	1.03915	1.23005	0.806106	0.0357669	0.852474	0.795976	0.70751	0.684157	0.743933	0.784657	0.724458	0.0425011	0.600515				C18:0	283.264	0.879625	1.06074	1.05964	0.972235	0.982967	1.72943	0.296559	0.425968
			C18:1	281.249	0.935676	1.15496	0.909363	1.1446	0.827148	1.02547	-0.00133607	0.994261	0.961548	1.12706	0.911393	1.07907	1.14479	0.849012	0.0346247	0.837268	0.852461	1.47834	0.669202	0.614266	1.13067	0.566779	-0.375997	0.492847	0.843139	0.916186	1.24068	0.909881	0.870298	0.748654	-0.246491	0.298166				C18:1	281.249	0.985706	0.984011	1.03028	1.39788	1.1929	1.74834	0.53244	0.0518703
			C20:0	311.296	1.15019	0.930218	0.91959	0.883503	0.895588	0.849308	-0.190778	0.180386	1.12129	0.879949	0.99876	0.923855	0.784823	0.973838	-0.161376	0.303598	1.06567	1.01487	0.919455	0.833071	1.5682	1.00052	0.181335	0.586176	1.39147	0.771355	0.837172	0.946732	0.573196	0.830175	-0.352239	0.391111				C20:0	311.296	0.844975	0.994011	1.16101	0.93502	0.983452	2.3284	0.501437	0.422522
			C20:1	309.28	0.945375	0.992202	1.06242	1.94749	1.37605	1.19623	0.591289	0.091422	0.840639	0.992029	1.16733	1.14038	1.14461	0.567161	-0.0729101	0.828973	1.05325	0.939583	1.00717	1.04274	1.43061	0.846035	0.145956	0.575542	1.07671	0.972069	0.951223	0.685214	0.885503	0.857537	-0.305043	0.0609055				C20:1	309.28	1.08748	0.832865	1.07965	1.6327	1.96521	1.80109	0.847728	0.00327849
			C20:3	305.249	1.18455	0.778448	1.03701	1.20539	0.920876	1.14858	0.126464	0.567193	0.858093	1.03778	1.10413	0.984345	1.14072	0.804432	-0.0343077	0.856436	1.09833	1.02587	0.875804	0.745625	1.04597	0.863097	-0.176421	0.3514	1.33945	0.964054	1.00223	0.800899	0.964619	0.957453	-0.279791	0.211388				C20:3	305.249	1.16619	0.796762	1.03705	1.71598	1.81401	1.59912	0.773747	0.0047209
			C20:4	303.233	1.11104	0.783808	1.10516	1.34905	0.965842	1.2168	0.235397	0.319197	0.827219	1.17527	0.997509	0.86957	1.06638	0.774939	-0.146199	0.506261	1.06454	1.01318	0.922281	1.089	1.19705	1.10433	0.176486	0.0720338	1.23382	0.863462	0.902715	0.668924	0.962972	0.875057	-0.259028	0.324009				C20:4	303.233	1.16288	0.787739	1.04938	1.9947	2.05842	1.74414	0.950408	0.00314472
			C20:5	301.217	1.13125	0.726716	1.14203	0.511138	0.587601	0.876509	-0.602929	0.124632	1.07067	0.797115	1.13222	1.2097	0.681565	0.876903	-0.116028	0.698227	0.867847	0.963321	1.16883	0.897136	1.50091	1.37712	0.331578	0.274874	1.1356	0.879894	0.984504	0.911644	1.52932	1.28265	0.311739	0.282169				C20:5	301.217	1.13484	0.738382	1.12678	0.882238	1.2997	0.953066	0.0635047	0.81855
			C24:0	367.358	0.897997	0.999393	1.10261	0.922149	0.925106	0.800293	-0.180306	0.177938	0.91296	0.92467	1.16237	1.0604	1.02275	1.14338	0.105021	0.442686	1.01643	1.05378	0.92979	0.680095	0.949278	0.660538	-0.389671	0.0773452	0.861892	0.81613	0.683414	0.511416	0.557476	0.492157	-0.597149	0.00939818				C24:0	367.358	1.00797	0.902418	1.08961	0.817535	1.02583	1.20063	0.0210004	0.911055
			C24:1	365.343	1.14641	0.783049	1.07054	1.03782	0.984187	1.0973	0.0562646	0.7477	0.884428	0.969723	1.14585	1.301	1.10483	0.959299	0.165698	0.386732	1.03334	0.960764	1.0059	0.696747	0.714386	0.633117	-0.553391	0.000607625	1.1353	0.858298	1.0064	0.540752	1.02671	0.856663	-0.307499	0.305052				C24:1	365.343	1.12379	0.797942	1.07827	1.0548	1.14315	0.819728	0.00847756	0.968515
			C26:0	395.389	1.14685	0.795973	1.05717	0.954484	1.01289	1.10596	0.0348433	0.840856	0.927289	0.924324	1.14839	1.25923	1.12779	1.0672	0.203397	0.180209	0.975944	1.00896	1.0151	0.733456	0.908021	0.813104	-0.289485	0.02483	1.05406	0.999571	0.94637	0.794295	1.18265	0.897934	-0.0614597	0.74608				C26:0	395.389	1.10321	0.831122	1.06567	0.964571	1.1815	1.11642	0.121008	0.458137
	Glycerolipids				24H								7W								17W								24W									Glycerolipids				24H
			Species	m/z	RA						log2(FC)	p-value	RA						log2(FC)	p-value	RA						log2(FC)	p-value	RA						log2(FC)	p-value				Species	m/z	RA						log2(FC)	p-value
					MeOH_1	MeOH_2	MeOH_3	PFOA_1	PFOA_2	PFOA_3			MeOH_1	MeOH_2	MeOH_3	PFOA_1	PFOA_2	PFOA_3			MeOH_1	MeOH_2	MeOH_3	PFOA_1	PFOA_2	PFOA_3			MeOH_1	MeOH_2	MeOH_3	PFOA_1	PFOA_2	PFOA_3								MeOH_1	MeOH_2	MeOH_3	PFOS_1	PFOS_2	PFOS_3
		MAGs	C20:3	381.3	1.28297	0.576729	1.1403	2.36278	2.37848	1.76725	1.11737	0.0165947	0.625256	1.44505	0.929691	0.822821	1.90881	0.903419	0.277014	0.643365	1.32722	1.00114	0.67164	0.957252	0.949624	0.652396	-0.229229	0.530528	1.11947	1.13791	0.742623	0.762171	0.841122	0.601231	-0.444495	0.145328			MAGs	C20:3	381.3	0.92767	0.730502	1.34183	0.533212	1.25111	0.784271	-0.223982	0.630989
			C20:4	379.284	0.946095	0.442274	1.61163	0.67272	0.488539	1.32423	-0.27143	0.705911	0.911656	0.721629	1.36671	1.23274	1.0086	1.26722	0.225919	0.460511	0.689474	0.976865	1.33366	1.20348	2.49756	1.60759	0.823378	0.144601	1.14971	0.772913	1.07737	1.62156	1.32054	1.33126	0.510411	0.0490257				C20:4	379.284	0.899321	0.928092	1.17259	3.38381	2.23919	1.95009	1.33592	0.0268814
		DAGs	C32:0	551.503	1.03147	0.94023	1.0283	1.21693	1.25516	1.23921	0.306963	0.00174694	1.00546	0.945763	1.04878	1.1846	1.08087	1.20796	0.211398	0.0325913	1.03536	1.03544	0.929204	1.18332	1.29543	1.31148	0.337327	0.00798635	1.0977	1.07024	1.06422	1.23672	1.32588	1.35023	0.275713	0.00324242			DAGs	C32:0	551.503	1.05467	0.87762	1.06771	0.832426	0.884001	0.814621	-0.245228	0.0731919
			C32:1	549.488	1.18643	0.627077	1.1865	0.905306	1.00442	1.20795	0.0555058	0.858703	1.02238	0.909677	1.06795	1.37269	1.26678	1.26321	0.379499	0.00705965	0.841273	1.01163	1.1471	1.12957	1.44968	1.23638	0.34696	0.103075	0.959434	1.05727	0.983296	1.47705	1.48876	1.41537	0.546358	0.000245597				C32:1	549.488	1.09392	0.907181	0.998895	0.954988	0.835464	0.847898	-0.185326	0.141448
			C34:0	579.535	1.2244	0.677027	1.09857	1.00916	1.14346	1.2435	0.178929	0.501431	1.10397	0.953266	0.942767	1.18368	0.989677	1.259	0.194236	0.206319	0.967849	0.991696	1.04045	1.07386	1.08185	1.08595	0.111772	0.020489	1.06972	1.20128	1.08607	1.26834	1.34427	1.19254	0.180753	0.0683338				C34:0	579.535	1.0941	0.922164	0.983741	0.789409	0.87592	0.805425	-0.280011	0.0361714
			C34:1	577.519	1.14869	0.575579	1.27573	0.98298	1.10317	1.1966	0.129941	0.695626	1.04106	0.894859	1.06408	1.27998	1.05632	1.20335	0.238648	0.0998988	0.891098	0.990149	1.11875	0.895973	1.21803	1.01777	0.0620172	0.72125	0.871594	1.14608	0.982323	1.36312	1.20112	1.35245	0.384672	0.0327648				C34:1	577.519	1.00866	0.924434	1.0669	0.886994	0.877771	0.889876	-0.176446	0.0501791
			C34:2	575.503	1.15924	0.567293	1.27347	0.962813	1.0987	1.21531	0.127337	0.709602	1.03487	0.883062	1.08207	1.37393	1.13643	1.39641	0.381015	0.0421031	0.796104	0.976521	1.22738	1.2186	1.82658	1.45188	0.584021	0.0827653	0.910314	1.144	0.945686	1.54266	1.90878	1.78847	0.804581	0.00455258				C34:2	575.503	1.09461	0.835555	1.06983	0.859397	0.835132	0.888745	-0.215762	0.17344
			C34:3	573.488	1.20171	0.501257	1.29703	0.897129	1.07175	1.17188	0.0661501	0.867287	1.04908	0.89181	1.05911	1.37085	1.03696	1.22095	0.274516	0.13128	0.809717	1.03032	1.15996	1.03929	1.59748	1.41109	0.432198	0.145087	0.921087	1.11984	0.959071	1.43815	1.85975	1.36312	0.635682	0.0290326				C34:3	573.488	1.06681	0.823152	1.11004	0.781468	0.801886	0.910023	-0.266861	0.1593
			C40:4	655.566	1.26162	0.454793	1.28359	0.58693	0.880467	1.29154	-0.12085	0.825157	0.993267	0.943767	1.06297	0.946466	0.67436	0.633058	-0.412549	0.0754546	0.743656	1.01526	1.24108	0.57733	0.737993	0.916801	-0.426545	0.215334	0.82319	1.17745	0.999357	0.550271	0.616878	0.524027	-0.826936	0.0146326				C40:4	655.566	1.14558	0.77257	1.08185	0.80405	1.16702	1.12581	0.0458527	0.852247
			C40:5	653.55	1.32521	0.630435	1.04436	0.726238	0.930386	1.15778	-0.0921332	0.807092	0.834989	0.95983	1.20518	1.20462	0.797636	0.921456	-0.0371605	0.883069	0.806821	0.951416	1.24176	0.722489	1.09138	0.922045	-0.13294	0.624974	0.787083	1.20886	1.00406	0.788753	0.842358	0.792936	-0.307545	0.193532				C40:5	653.55	1.14451	0.816151	1.03934	0.816154	1.06723	1.1576	0.0195796	0.927322
			C40:6	651.535	1.30949	0.519478	1.17103	0.624956	0.890363	1.19004	-0.149145	0.754471	1.01322	0.963799	1.02298	0.887454	0.695076	0.619719	-0.445985	0.0313386	0.765319	0.949072	1.28561	0.529331	0.769731	1.07591	-0.337055	0.396465	0.830539	1.16714	1.00232	0.669509	0.76455	0.696712	-0.493587	0.0457882				C40:6	651.535	1.08861	0.877082	1.03431	0.499505	1.10577	1.00039	-0.203312	0.542072
		TAGs	C46:0	796.739	1.07048	0.7232	1.20632	0.928608	1.01178	1.16069	0.0478047	0.842611	1.01176	0.939407	1.04883	1.09622	0.941258	1.07552	0.0533409	0.553038	0.893021	0.997916	1.10906	0.986919	1.17829	1.09325	0.119228	0.359946	0.969059	1.05601	0.97493	1.07252	1.15584	1.07308	0.138133	0.0633432			TAGs	C46:0	796.739	1.07656	0.883355	1.04008	1.07699	0.988945	1.02718	0.0440993	0.655564
			C46:1	794.723	1.11379	0.765734	1.12047	0.896708	1.00183	1.16011	0.0279338	0.895644	1.00466	0.959699	1.03565	1.09651	0.944281	1.07981	0.0568603	0.490428	0.892046	0.988051	1.1199	0.981873	1.16856	1.06239	0.0988824	0.452603	0.962894	1.05304	0.984069	1.096	1.14095	1.05221	0.132755	0.0613974				C46:1	794.723	1.12522	1.08733	0.787458	1.47134	0.949553	0.810487	0.107188	0.751919
			C46:2	792.708	1.23387	0.783795	0.982336	0.678033	0.658715	0.875029	-0.439757	0.149306	0.988224	1.06681	0.944969	1.02222	0.914206	1.03046	-0.0160138	0.841414	0.874044	0.980983	1.14497	1.00737	1.16234	1.00335	0.0809093	0.574898	0.988663	0.999506	1.01183	1.06218	1.04474	0.926169	0.0158272	0.811257				C46:2	792.708	1.1657	1.0756	0.758696	1.09573	0.602707	0.676251	-0.337224	0.34972
			C48:0	824.77	1.06351	0.773582	1.16291	0.900823	1.00512	1.19876	0.0494956	0.822574	0.986057	0.927441	1.0865	1.11865	0.95094	1.08134	0.0708173	0.505493	0.916984	1.02687	1.05615	0.987502	1.1107	1.16152	0.119788	0.264743	0.986447	1.0208	0.992757	1.08977	1.18837	1.10334	0.172692	0.0175492				C48:0	824.77	1.09086	0.884076	1.02506	0.857578	0.960334	0.810517	-0.190761	0.175554
			C48:1	822.755	1.0444	0.767701	1.1879	0.895578	1.02368	1.18725	0.0503335	0.823874	1.01055	0.941891	1.04756	1.11346	0.969749	1.0881	0.0801161	0.350198	0.909983	1.00137	1.08865	1.01462	1.19929	1.13401	0.158299	0.19562	0.969442	1.04034	0.990217	1.14938	1.23648	1.13309	0.230181	0.0107623				C48:1	822.755	1.18802	0.906179	0.905806	1.16603	1.03573	0.916201	0.055637	0.756696
			C48:2	820.739	1.09242	0.784918	1.12266	0.699367	0.829249	1.02745	-0.23104	0.362247	0.95574	0.918215	1.12604	1.03936	0.910887	1.06636	0.00796208	0.948126	0.84107	1.00953	1.1494	1.11283	1.33357	1.11273	0.24656	0.182176	0.980704	1.06034	0.958952	1.21532	1.32256	1.17188	0.306364	0.0121365				C48:2	820.739	1.20761	0.997648	0.794744	1.17071	0.973254	0.753107	-0.0503667	0.849531
			C50:0	852.801	1.11283	0.68667	1.2005	0.853696	1.07547	1.25067	0.0839888	0.774873	1.00146	0.931698	1.06684	1.11939	0.932802	1.08218	0.0632162	0.552117	0.911506	1.00601	1.08249	0.99353	1.15975	1.12349	0.127314	0.261648	1.0871	1.15382	1.09866	1.19599	1.41907	1.22383	0.201026	0.0851912				C50:0	852.801	1.12346	0.797087	1.07946	0.808292	0.9586	0.784136	-0.233884	0.266188
			C50:1	850.786	1.07737	0.722791	1.19984	0.854676	1.04323	1.22373	0.0573399	0.831321	0.994897	0.907843	1.09726	1.12897	0.967906	1.11339	0.0977276	0.403026	0.914647	0.988367	1.09699	1.04895	1.29927	1.20861	0.245633	0.109071	0.97616	1.03738	0.986464	1.21607	1.17067	1.19529	0.255812	0.00108667				C50:1	850.786	1.10585	0.880927	1.01322	0.93488	1.03176	0.902813	-0.0641869	0.597151
			C50:2	848.77	1.08568	0.775383	1.13893	0.884735	1.05131	1.22577	0.0757919	0.737569	1.02095	0.920924	1.05812	1.13231	0.9711	1.09371	0.0918103	0.359657	0.862831	0.996182	1.14099	1.01198	1.3486	1.19098	0.24349	0.218651	1.01579	1.04046	0.983039	1.27675	1.37507	1.3074	0.381482	0.000787979				C50:2	848.77	1.22176	0.919774	0.858468	1.18822	1.11725	0.852252	0.0739218	0.746624
			C50:3	846.755	1.02222	0.799326	1.17845	0.864855	0.942101	1.16183	-0.015088	0.944909	1.02729	0.914721	1.05799	1.18823	1.04337	1.16473	0.179013	0.102224	0.92048	0.989209	1.09031	1.09308	1.40404	1.21104	0.305743	0.0840745	0.988321	1.03565	0.976034	1.12459	1.30711	1.23775	0.2906	0.0165404				C50:3	846.755	1.14915	0.970468	0.880384	1.1379	1.03216	0.89914	0.0329019	0.836748
			C52:1	878.817	0.98279	0.574104	1.44311	0.990025	1.29741	1.60693	0.376426	0.387562	1.00163	0.913522	1.08485	1.12982	0.917285	1.0163	0.0301731	0.801918	0.913726	1.01211	1.07416	1.00526	1.09068	1.12426	0.102188	0.278752	0.942405	1.07853	0.979063	1.02559	1.31809	0.8194	0.0763676	0.735861				C52:1	878.817	1.07725	0.844945	1.0778	0.878242	1.03822	0.949993	-0.0656937	0.647814
			C52:2	876.801	1.0941	0.697992	1.2079	0.813737	1.01432	1.24464	0.0345469	0.908689	1.03922	0.896475	1.06431	1.16243	0.944766	1.1081	0.0999885	0.439685	0.905716	0.981882	1.1124	1.16276	1.62985	1.36869	0.472072	0.0590903	0.962642	1.05881	0.978546	1.31664	1.50462	1.30126	0.458564	0.00647528				C52:2	876.801	1.13811	0.90188	0.960007	1.04544	1.1263	0.996943	0.0789186	0.523173
			C52:3	874.786	1.08783	0.806454	1.10571	0.813774	1.00175	1.18626	0.0008536	0.996934	1.04045	0.917374	1.04217	1.15425	0.985155	1.13818	0.127673	0.24466	0.932994	0.984733	1.08227	1.22031	1.72519	1.44115	0.548157	0.0387752	0.978298	1.04398	0.977725	1.42391	1.48608	1.42574	0.531312	0.000120193				C52:3	874.786	1.2672	0.884393	0.848412	1.20695	1.16821	1.02286	0.179732	0.412682
			C52:4	872.77	1.146	0.555943	1.29805	0.778722	0.952426	1.23206	-0.0178032	0.964912	1.0126	0.889643	1.09775	1.18834	0.878204	1.17722	0.112707	0.529529	0.888762	1.01087	1.10037	1.13751	1.7884	1.40663	0.530253	0.0888932	0.985234	1.06925	0.945512	1.39996	1.41286	1.47555	0.515466	0.000580495				C52:4	872.77	0.889322	1.13344	0.977239	1.02902	1.159	0.783392	-0.0138111	0.945613
			C54:1	906.848	1.17805	0.619321	1.20262	0.852544	1.09404	1.33526	0.129545	0.710901	1.02038	0.912638	1.06699	1.16383	0.897386	1.112	0.0809844	0.570281	0.836242	0.970375	1.19338	0.829695	1.11557	0.904241	-0.0742523	0.728711	0.978642	1.07935	0.942012	0.821525	1.06804	0.798484	-0.158403	0.337616				C54:1	906.848	1.08716	0.845289	1.06755	0.831923	0.957739	0.878433	-0.169153	0.26684
			C54:2	904.833	1.12693	0.6965	1.17657	0.832352	1.07329	1.32838	0.108368	0.728087	1.03326	0.908919	1.05782	1.14572	0.836826	1.08867	0.0338484	0.83299	0.892324	0.977995	1.12968	1.09099	1.4758	1.27315	0.356121	0.0994371	1.17309	1.31664	1.20393	1.33921	1.69375	1.33384	0.241529	0.151577				C54:2	904.833	1.13975	0.904602	0.955652	1.00869	1.21028	0.958087	0.0827315	0.604175
			C54:3	902.817	1.16724	0.752446	1.08031	0.863367	0.91669	1.31279	0.0439706	0.87842	1.04017	0.896155	1.06368	1.13856	0.950282	1.10354	0.0896723	0.457185	0.93378	0.969076	1.09714	1.30039	1.94741	1.55301	0.678315	0.0368225	0.974571	1.05712	0.968307	1.34526	1.49716	1.35333	0.483965	0.00220672				C54:3	902.817	1.13528	0.931141	0.933582	1.38575	1.34668	1.42697	0.471414	0.00567378
			C54:4	900.801	1.09759	0.661945	1.24046	0.753586	0.929795	1.1781	-0.0682016	0.8391	0.987809	0.871724	1.14047	1.08623	0.922093	1.18086	0.0882249	0.592243	0.927668	0.993206	1.07913	1.27058	1.98011	1.58761	0.689536	0.043238	1.00561	1.03226	0.962127	1.4086	1.37894	1.00596	0.338566	0.113931				C54:4	900.801	0.884581	0.984884	1.13054	1.0348	1.55749	1.74045	0.530317	0.117353
			C54:5	898.786	1.14919	0.566212	1.2846	0.758998	0.954398	1.16629	-0.0590502	0.880236	1.0468	0.820816	1.13238	1.21585	0.86514	1.2397	0.146522	0.522294	0.923733	0.962128	1.11414	1.2386	2.0257	1.57073	0.688561	0.0601649	0.958914	1.07814	0.96295	1.40864	1.62576	1.42665	0.572421	0.00364639				C54:5	898.786	1.03727	0.81923	1.1435	1.21763	1.48456	1.84219	0.59912	0.0655944
			C54:6	896.77	1.18823	0.471456	1.34031	0.728586	0.89441	1.14454	-0.116362	0.805074	1.04337	0.825353	1.13128	1.17909	0.874678	1.40663	0.205978	0.439403	0.863237	0.875332	1.26143	1.09593	2.06903	1.56257	0.656125	0.136714	0.950934	1.13015	0.918913	1.40005	1.33133	1.41695	0.46757	0.00565387				C54:6	896.77	1.06646	0.821022	1.11252	0.777994	0.757567	0.814001	-0.352571	0.0778659
			C56:1	934.88	1.09037	0.638337	1.27129	0.863496	0.993681	1.29125	0.0696684	0.838017	0.956352	0.912263	1.13139	1.1438	0.961664	1.07477	0.0841712	0.520617	0.814843	1.01625	1.1689	0.860497	1.28559	1.03731	0.0856028	0.722418	1.03239	1.01777	0.949844	0.894202	1.03782	0.830352	-0.119052	0.29891				C56:1	934.88	1.16917	0.790553	1.04027	0.975323	1.01718	1.2157	0.0968044	0.630845
			C56:2	932.864	1.04199	0.6429	1.31511	0.852482	1.09551	1.386	0.152291	0.677638	1.03659	0.922978	1.04043	1.16386	0.976163	1.09964	0.110881	0.300353	0.871997	0.987376	1.14063	0.970144	1.47769	1.08792	0.237057	0.35771	0.987041	1.05755	0.955411	0.953661	1.21298	0.92282	0.0423908	0.773502				C56:2	932.864	1.16571	0.889025	0.945266	1.2622	1.20412	1.15497	0.271539	0.0826995
	Sphingolipids				24H							7W								17W									24W									Sphingolipids				24H
			Species	m/z	RA						log2(FC)	p-value	RA						log2(FC)	p-value	RA						log2(FC)	p-value	RA						log2(FC)	p-value				Species	m/z	RA						log2(FC)	p-value
					MeOH_1	MeOH_2	MeOH_3	PFOA_1	PFOA_2	PFOA_3			MeOH_1	MeOH_2	MeOH_3	PFOA_1	PFOA_2	PFOA_3			MeOH_1	MeOH_2	MeOH_3	PFOA_1	PFOA_2	PFOA_3			MeOH_1	MeOH_2	MeOH_3	PFOA_1	PFOA_2	PFOA_3								MeOH_1	MeOH_2	MeOH_3	PFOS_1	PFOS_2	PFOS_3
		Cer	C14:0	508.474	1.15837	0.795308	1.04633	0.802769	0.925657	1.0653	-0.102774	0.628487	1.02714	0.911525	1.06133	1.1944	0.903297	0.997028	0.0448492	0.761172	0.950162	0.843362	1.20648	0.995342	1.38826	1.2054	0.258624	0.277969	0.971802	1.0241	1.0041	1.22689	1.12693	1.04439	0.179809	0.0730063			Cer	C14:0	508.474	1.09422	0.868818	1.03696	0.876312	1.17937	1.00163	0.0272985	0.871641
			C16:0	536.505	0.94907	1.00122	1.04971	0.468866	0.625287	0.745817	-0.705281	0.0105418	1.16265	0.780435	1.05692	1.27104	0.695647	0.788685	-0.122716	0.719609	0.810869	0.983412	1.20572	1.57329	1.92624	1.43586	0.718199	0.0253806	0.929807	1.12043	0.949759	1.16576	1.09572	0.979805	0.111602	0.378195				C16:0	536.505	1.11369	0.942114	0.944196	0.841605	1.18164	0.870714	-0.0519192	0.787714
			C18:0	564.536	1.04813	0.704947	1.24693	0.664902	0.780858	1.48605	-0.0331724	0.943519	0.964776	0.944128	1.0911	1.23194	0.990968	1.1172	0.154935	0.245544	0.790062	0.857907	1.35203	0.981072	2.30752	1.8685	0.781594	0.168611	0.797961	1.26173	0.940311	1.12238	0.989245	0.810784	-0.037802	0.882481				C18:0	564.536	1.0476	0.903323	1.04908	0.594504	0.768146	1.29941	-0.172417	0.631819
			C20:0	592.567	0.947344	1.01201	1.04065	0.515012	0.580747	0.806172	-0.657498	0.0166486	1.12738	0.926367	0.946254	1.45253	0.771603	0.851773	0.036048	0.915577	0.848109	0.943588	1.2083	1.86366	2.6697	0.612037	0.77832	0.304899	0.866514	1.20926	0.92423	0.930649	0.985308	1.05783	-0.01266	0.941655				C20:0	592.567	1.43762	1.01063	0.551758	0.926493	1.08364	1.10816	0.0557925	0.887673
			C22:1	618.583	1.36584	0.708951	0.925214	0.686916	0.941985	1.07281	-0.151087	0.680142	1.04276	0.85158	1.10566	1.06947	0.981128	1.09918	0.070291	0.585205	0.872064	0.878242	1.24969	0.909263	1.18071	1.33124	0.189542	0.468752	0.901019	1.25555	0.843427	0.819586	0.648872	0.645553	-0.50498	0.104448				C22:1	618.583	1.26013	0.752363	0.987506	0.837879	1.11129	0.977373	-0.0357665	0.890258
			C22:0	620.599	1.23787	0.748706	1.01342	0.703834	0.830439	1.00672	-0.239569	0.409953	0.993978	0.96947	1.03655	1.2964	0.847846	0.919266	0.0302264	0.887532	0.869752	1.01482	1.11543	1.17705	1.50548	1.34713	0.425694	0.0444406	0.990808	1.15385	0.855338	0.885897	0.89227	0.792463	-0.222841	0.195265				C22:0	620.599	1.16592	0.784102	1.04997	0.785127	0.976904	0.877661	-0.184593	0.393976
			C24:1	646.614	1.17514	0.77695	1.04791	0.739795	0.892337	1.14835	-0.109627	0.684443	1.00084	0.889911	1.10925	1.21879	0.874818	0.952981	0.022234	0.904728	0.84065	1.1127	1.04665	1.30291	1.70807	1.59616	0.618908	0.0213867	1.35448	1.56497	1.1744	1.35315	1.59496	1.2646	0.0412905	0.804665				C24:1	646.614	1.22026	0.746743	1.033	0.746484	1.08111	1.10057	-0.0349665	0.900232
			C24:0	648.63	1.22986	0.770837	0.999303	0.74468	0.792846	1.05144	-0.212587	0.448386	1.02802	0.908372	1.0636	1.27439	0.836066	0.963268	0.0350239	0.8677	0.881924	1.01313	1.10495	1.00818	1.2225	1.03297	0.121526	0.401128	0.938338	1.13452	0.927139	1.01786	1.17848	1.0724	0.123773	0.337099				C24:0	648.63	1.18742	0.814887	0.997696	0.749165	1.03488	1.01207	-0.101537	0.655704
			C26:1	674.646	1.21163	0.779736	1.00864	0.636961	0.796677	0.938196	-0.33896	0.240647	1.06316	0.894962	1.04187	1.3163	0.799376	0.974626	0.0427858	0.860557	0.907787	1.00091	1.0913	1.31248	1.62156	1.38327	0.525168	0.0150201	1.03369	1.02231	0.85365	1.33669	1.43716	1.33289	0.497147	0.00409586				C26:1	674.646	1.22902	0.770687	1.00029	0.643414	0.881922	1.00374	-0.246349	0.406618
			C26:0	676.661	1.21798	0.682432	1.09959	0.723954	0.761208	1.06773	-0.232829	0.488458	1.05096	0.882096	1.06695	1.24987	0.736302	0.987154	-0.0128853	0.958249	0.850586	1.02508	1.12433	1.10986	1.22702	1.15273	0.218103	0.134	0.941135	1.13525	0.92361	1.13838	1.29605	1.03104	0.20809	0.204922				C26:0	676.661	1.13794	0.796959	1.0651	0.729246	0.991705	1.00217	-0.1397	0.536941
		DiHCer	C16:0	538.52	1.1514	0.778423	1.07017	0.659169	0.740814	1.16083	-0.228358	0.488886	1.0183	0.891641	1.09005	1.13838	0.810511	0.888526	-0.0803839	0.661051	0.861832	0.890983	1.24719	0.780762	0.989418	0.827572	-0.207699	0.389587	0.718042	1.22308	1.05888	0.987352	1.06059	1.13217	0.0841148	0.717373			DiHCer	C16:0	538.52	1.17017	0.800024	1.02981	0.737327	0.627675	0.903385	-0.403296	0.143783
			C18:0	566.552	1.07997	0.836408	1.08362	0.576844	0.637749	1.06232	-0.397882	0.236483	1.06972	0.872941	1.05734	1.12911	0.68741	0.79803	-0.198402	0.431899	0.825965	0.914146	1.25989	1.29033	1.47711	0.916142	0.296147	0.341964	0.702153	1.25173	1.04612	0.828729	1.02928	0.934258	-0.103527	0.705366				C18:0	566.552	1.0601	0.884464	1.05544	0.661786	1.02505	1.11919	-0.096431	0.69047
			C20:0	594.583	1.11036	0.771898	1.11774	0.62898	0.67804	1.18395	-0.268252	0.466177	1.02761	0.869587	1.1028	1.17862	0.777903	0.796443	-0.123976	0.606601	0.768135	0.927075	1.30479	1.16243	1.39359	1.04197	0.262232	0.352571	0.667721	1.31232	1.01996	0.708643	0.784	0.789275	-0.394715	0.272254				C20:0	594.583	1.07752	0.904443	1.01804	0.672703	0.923544	1.06123	-0.174906	0.411167
			C22:0	622.614	1.22381	0.743277	1.03291	0.671157	0.696308	1.07376	-0.297359	0.384615	0.996011	0.930933	1.07306	1.08146	0.786002	0.886258	-0.123582	0.440575	0.906536	0.95439	1.13907	1.06105	1.25054	1.22933	0.239164	0.124073	0.872193	1.12354	1.00426	0.852959	1.02114	0.947704	-0.0883478	0.534032				C22:0	622.614	1.15492	0.869361	0.975721	0.712686	0.889691	0.923175	-0.248364	0.209501
			C24:0	650.646	1.24706	0.657915	1.09503	0.632922	0.692449	0.965375	-0.389145	0.311173	1.06644	0.863929	1.06963	1.19171	0.737949	0.904115	-0.082238	0.72883	0.947659	0.919581	1.13276	0.814056	0.753516	0.940953	-0.258123	0.131916	0.766862	1.21317	1.01997	0.907392	1.11621	1.10501	0.0605611	0.783552				C24:0	650.646	1.04096	0.949092	1.00995	0.662449	1.00956	0.918974	-0.211464	0.273086
		HexosylCer	C14:0	670.526	1.24696	0.716194	1.03684	0.938572	1.14459	1.38328	0.208491	0.482001	0.940906	1.00131	1.05778	1.10795	0.990806	1.03239	0.061727	0.414923	0.965981	0.661144	1.37288	0.926589	1.19958	0.89974	0.012404	0.97152	1.00396	1.14889	0.847156	1.22029	1.73435	1.25986	0.490396	0.0960195			HexosylCer	C14:0	670.526	1.20811	0.822374	0.96952	1.14423	1.2987	0.884221	0.149322	0.545022
			C16:0	698.558	1.24887	0.710179	1.04095	0.77947	0.999445	1.40267	0.0847826	0.813785	1.00656	0.850338	1.1431	1.14363	0.847837	1.01589	0.0035343	0.984719	0.914527	0.93136	1.15411	0.670229	0.820464	0.737675	-0.428975	0.043973	0.851891	1.20649	0.941616	0.982266	1.5957	1.21585	0.338687	0.272337				C16:0	698.558	1.30608	0.7217	0.972221	0.847372	1.23516	0.763809	-0.0758518	0.829622
			C16:1	696.542	1.25897	0.723183	1.01785	0.908806	1.06812	1.31702	0.134855	0.642102	1.00871	0.917165	1.07412	1.14716	0.943622	1.00745	0.0464844	0.686456	0.838773	0.898628	1.2626	0.778272	0.743869	0.704601	-0.430028	0.127029	0.993682	1.0972	0.909117	0.880619	1.07751	0.932056	-0.053802	0.671807				C16:1	696.542	1.15693	0.848283	0.994782	1.19787	1.36038	0.831182	0.176083	0.510955
			C22:0	782.652	1.24417	0.735086	1.02074	0.946413	1.07246	1.27944	0.136764	0.603129	0.987876	0.934921	1.0772	1.10568	0.955036	1.02537	0.0408148	0.658204	0.789654	0.942648	1.2677	0.637947	0.584654	0.58892	-0.727761	0.0493003	0.812585	1.26571	0.921706	0.693993	1.01517	0.907715	-0.197117	0.484584				C22:0	782.652	1.24582	0.807913	0.946271	0.956417	1.07487	0.779913	-0.0937777	0.70562
			C24:0	810.683	1.28037	0.704737	1.01489	0.896588	1.05028	1.26427	0.098123	0.739668	0.983001	0.925068	1.09193	1.12	0.909073	0.992239	0.0102118	0.93221	0.834766	1.05377	1.11147	0.728061	0.835034	0.698415	-0.407676	0.0587705	0.775358	1.33384	0.8908	0.701446	1.08361	0.932047	-0.142895	0.666825				C24:0	810.683	1.21585	0.808717	0.975429	0.995114	1.13695	0.801185	-0.0324649	0.89146
			C24:1	808.667	1.11498	0.896588	0.988435	0.852961	0.996138	1.25431	0.0488905	0.808873	1.01138	0.916413	1.07221	1.15463	0.993556	1.06825	0.1005	0.329051	0.87677	1.05139	1.07184	0.909209	0.9202	0.766802	-0.208554	0.164443	0.935746	1.06291	1.00135	0.845816	0.952424	1.00772	-0.0964692	0.342024				C24:1	808.667	1.03114	0.964554	1.00431	1.15696	1.47423	1.13432	0.327883	0.0838363
			C26:0	838.714	1.23586	0.713124	1.05102	0.905373	1.03473	1.10414	0.021117	0.93258	0.965113	0.920373	1.11451	1.11268	0.969515	0.9485	0.0146846	0.902155	0.853666	1.00168	1.14465	0.74703	0.759704	0.718623	-0.430926	0.0383191	0.803607	1.25002	0.946373	0.740168	1.11899	0.858574	-0.142559	0.614947				C26:0	838.714	1.204	0.79128	1.00472	0.960308	1.13605	0.789389	-0.0560165	0.818707
			C26:1	836.698	1.26124	0.712083	1.02668	0.855821	1.00308	1.19001	0.0233322	0.934423	1.01442	0.914624	1.07096	1.13511	0.894746	1.00033	0.0144448	0.909597	0.842269	1.04896	1.10877	0.818207	0.948793	0.802871	-0.223267	0.198265	0.790868	1.24534	0.915578	0.884141	1.1685	1.15226	0.118695	0.633944				C26:1	836.698	1.25902	0.799351	0.941631	0.932736	1.1688	0.893051	-0.00260604	0.991584
		SM	C14:0	675.544	1.28871	0.451036	1.26026	0.863895	1.35585	1.51	0.314115	0.509995	0.931298	0.885161	1.18354	1.4712	1.09012	1.32662	0.374045	0.110244	0.809582	0.98078	1.20964	0.755854	1.20755	1.05726	0.00990421	0.970697	0.95679	1.09919	0.944018	1.1787	1.6662	1.24961	0.448727	0.0847566			SM	C14:0	675.544	1.25148	0.60397	1.14455	0.879342	1.12585	1.14425	0.0701348	0.830339
			C16:0	703.575	1.29541	0.519883	1.1847	1.00244	1.37508	1.42222	0.340939	0.389089	0.923689	0.911683	1.16463	1.27187	1.05704	1.24408	0.25217	0.147309	0.891216	0.957145	1.15164	0.686763	1.01547	0.877094	-0.217967	0.318753	0.926906	1.0941	0.978989	1.02463	1.25119	1.06337	0.154535	0.257268				C16:0	703.575	1.15151	0.750244	1.09825	0.90782	1.04638	1.01391	-0.0154177	0.939955
			C16:1	701.559	1.23642	0.552258	1.21132	0.991059	1.30688	1.46611	0.327322	0.389205	0.977959	0.911474	1.11057	1.32248	1.096	1.19741	0.269386	0.0796121	0.874509	0.978485	1.14701	0.883265	1.16066	1.09158	0.0637343	0.714824	0.988773	1.06578	0.945444	1.18553	1.4308	1.26645	0.372129	0.0214756				C16:1	701.559	1.20248	0.688557	1.10896	0.945037	1.12909	1.072	0.0686166	0.78521
			C18:0	731.606	1.05081	0.693315	1.25587	1.22234	1.71356	1.54602	0.579154	0.0867464	0.853288	1.01269	1.13402	1.2884	0.968807	1.39651	0.284401	0.224908	0.998617	0.960021	1.04136	0.67318	1.09461	0.933199	-0.151474	0.46986	0.772547	1.35359	0.873861	1.06679	1.25798	0.994961	0.146108	0.614848				C18:0	731.606	1.07952	0.870693	1.04979	0.846121	1.20234	1.02772	0.0361801	0.844997
			C18:1	729.591	1.38904	0.618031	0.992929	1.10254	1.52012	1.57636	0.485089	0.210306	0.919932	0.93938	1.14069	1.19862	0.999455	1.08558	0.13034	0.358101	0.964518	1.07799	0.957493	1.4233	1.93094	1.70844	0.754937	0.0106339	0.934216	0.983352	1.08243	1.56809	1.963	1.41278	0.720679	0.0187257				C18:1	729.591	1.37036	0.764892	0.864749	1.03363	1.05049	1.15852	0.112206	0.694411
			C22:0	787.669	1.19786	0.492647	1.30949	0.853591	1.26451	1.20644	0.148191	0.724588	0.883327	0.93024	1.18643	1.31833	1.01003	1.27083	0.26271	0.211385	0.833531	1.00855	1.15792	0.375093	0.662438	0.649599	-0.830391	0.0298902	0.887824	1.11393	0.998248	0.834023	1.11207	0.85782	-0.0975191	0.585532				C22:0	787.669	1.09563	0.671777	1.2326	0.882177	0.896291	0.821832	-0.206285	0.477841
			C22:1	785.653	1.20422	0.551955	1.24382	1.03344	1.71691	1.72148	0.575902	0.200314	0.934506	0.944826	1.12067	1.32327	1.28854	1.29185	0.379867	0.00801572	0.886559	0.905431	1.20801	0.779461	1.05412	0.851702	-0.15989	0.473371	1.04584	1.08716	0.898491	1.15978	1.46129	1.25187	0.353401	0.0572202				C22:1	785.653	1.27361	0.58074	1.14565	1.03409	1.18772	1.0562	0.127855	0.692902
			C24:0	815.7	1.25177	0.417524	1.3307	0.765158	1.26965	1.26932	0.139307	0.778569	0.88619	0.904367	1.20944	1.42519	0.940393	1.26727	0.276142	0.2995	0.786963	0.995161	1.21788	0.312042	0.718414	0.617929	-0.863909	0.0611042	0.750368	1.24477	1.00486	0.882929	1.27117	0.898904	0.0252671	0.930729				C24:0	815.7	1.17611	0.688921	1.13497	0.836284	1.01631	0.929093	-0.109001	0.680951
			C24:1	813.684	1.15136	0.571395	1.27724	1.00861	1.4044	1.46053	0.368691	0.325039	0.967995	0.927737	1.10427	1.31332	1.13187	1.30198	0.320837	0.0348962	0.94022	0.900661	1.15912	0.759666	1.1174	0.945712	-0.0878465	0.675128	0.832042	1.04861	0.953212	1.15102	1.3651	1.23724	0.405411	0.0255449				C24:1	813.684	1.0181	0.755851	1.22605	0.989331	1.22661	1.17196	0.175428	0.447817
	Phospholipids				24H								7W								17W								24W									Phospholipids				24H
			Species	m/z	RA						log2(FC)	p-value	RA						log2(FC)	p-value	RA						log2(FC)	p-value	RA						log2(FC)	p-value				Species	m/z	RA						log2(FC)	p-value
					MeOH_1	MeOH_2	MeOH_3	PFOA_1	PFOA_2	PFOA_3			MeOH_1	MeOH_2	MeOH_3	PFOA_1	PFOA_2	PFOA_3			MeOH_1	MeOH_2	MeOH_3	PFOA_1	PFOA_2	PFOA_3			MeOH_1	MeOH_2	MeOH_3	PFOA_1	PFOA_2	PFOA_3								MeOH_1	MeOH_2	MeOH_3	PFOS_1	PFOS_2	PFOS_3
		PA	C32:0	759.637	1.1883	0.656811	1.15489	1.27248	1.09572	1.01607	0.173883	0.532704	1.122	0.897496	0.980503	1.2214	1.03707	0.740643	-0.000425556	0.998569	0.965093	0.802224	1.23268	1.04856	0.943962	0.924785	-0.0403248	0.843916	1.15365	1.05121	0.79514	1.2031	1.72353	1.1683	0.448871	0.155424			PA	C32:0	759.637	1.2575	0.72989	1.01261	1.52893	0.944079	0.689294	0.0760146	0.861824
			C32:1	757.622	1.23154	0.606743	1.16171	3.80198	2.21435	1.65691	1.35487	0.0814012	0.72286	1.47053	0.806606	0.911016	1.89254	0.736523	0.23882	0.697336	1.41305	0.974649	0.612303	1.51659	0.911703	0.855547	0.13042	0.777947	1.05411	0.952006	0.993888	1.00245	0.779292	0.899851	-0.161871	0.209121				C32:1	757.622	1.14944	0.833703	1.01686	4.6342	1.5677	1.16953	1.29698	0.255308
			C34:0	869.747	1.29097	0.676926	1.0321	1.13548	1.09611	1.20672	0.196736	0.464598	0.955664	0.927923	1.11641	1.09823	0.734395	0.69348	-0.248049	0.326568	1.07537	0.760966	1.16366	0.873973	1.00453	1.08212	-0.0190618	0.928	0.869178	1.39006	0.740763	1.26584	1.324	1.00235	0.259902	0.423802				C34:0	869.747	1.31241	0.650709	1.03689	1.2405	0.691875	0.77182	-0.149764	0.720862
			C34:1	843.731	1.24948	0.772953	0.977568	3.5424	2.10392	1.5393	1.26015	0.0848331	0.769072	1.35505	0.875881	0.872937	1.61692	0.701163	0.0890573	0.858021	1.4225	0.897926	0.679577	1.00391	0.766805	0.566716	-0.360038	0.433795	1.02011	1.19436	0.785531	0.877719	0.935007	0.784659	-0.207902	0.347824				C34:1	843.731	1.23273	0.804489	0.962782	4.11359	1.35713	1.27861	1.16978	0.254647
			C34:2	841.716	1.13319	0.739931	1.12688	3.0945	2.15884	1.5938	1.19054	0.0483625	0.770131	1.25904	0.970826	0.834295	1.48195	0.862292	0.0834014	0.826641	1.27435	0.931199	0.794453	0.90729	0.922108	0.962853	-0.103534	0.655064	1.15919	0.953779	0.887031	0.972918	0.563246	0.720385	-0.410844	0.161998				C34:2	841.716	1.09106	0.82374	1.0852	5.04231	1.87092	1.53463	1.49362	0.180522
		PCs	C32:3	728.523	1.17414	0.675722	1.15014	0.852277	1.03335	1.20644	0.0436099	0.880636	0.99357	0.915081	1.09135	1.07513	0.96551	1.02547	0.031444	0.732176	0.983966	0.940817	1.07522	1.20069	1.45825	1.3011	0.400553	0.0195235	0.88768	1.02936	0.928322	1.38722	1.3234	1.43885	0.544321	0.00126996			PCs	C32:3	728.523	1.10051	0.868747	1.03075	0.927377	1.02033	0.827539	-0.112346	0.444363
			C32:4	726.507	1.4767	0.538027	0.985276	0.761631	1.18658	1.27773	0.104757	0.822389	1.03826	0.990694	0.971043	1.30481	1.01858	1.19496	0.229937	0.114066	0.861145	0.901796	1.23706	1.22605	1.90206	1.66532	0.676094	0.0608914	0.907235	1.13758	0.955187	1.58404	2.01089	1.58944	0.789208	0.00993383				C32:4	726.507	1.13405	0.878295	0.987655	0.716624	0.966185	0.691257	-0.337602	0.143355
			C34:0	762.601	1.08119	0.79006	1.12875	1.09856	1.3232	1.3696	0.337749	0.122299	0.988459	0.974747	1.03679	1.02164	1.10561	1.09443	0.102854	0.0844489	0.917413	0.950517	1.13207	0.98425	1.10053	0.931597	0.00785426	0.950906	1.07529	1.04456	1.01878	1.18578	1.33549	1.19727	0.244605	0.0190171				C34:0	762.601	1.04709	0.856048	1.09686	1.14961	1.27572	1.06216	0.217229	0.166005
			C34:1	760.585	1.03078	0.933375	1.03585	1.02512	1.05887	1.07784	0.0757984	0.215909	1.00583	0.990374	1.00379	1.01802	1.02919	1.02748	0.035477	0.0139809	0.990114	0.995618	1.01427	0.996533	1.04139	0.996921	0.0166622	0.522317	0.990669	1.01475	0.994585	1.03861	1.05045	1.0534	0.0669343	0.0055236				C34:1	760.585	1.00108	0.973055	1.02586	0.995611	1.01438	0.985717	-0.00206475	0.938501
			C34:2	758.569	1.08191	0.857673	1.06042	0.982068	1.03802	1.14015	0.0750692	0.564351	1.01071	0.984082	1.00521	1.05698	1.03556	1.06184	0.0723901	0.0108635	0.966468	0.988085	1.04545	0.990589	1.08824	1.04268	0.0572827	0.332349	0.981376	1.03229	0.986339	1.09306	1.13359	1.1016	0.149805	0.00579814				C34:2	758.569	1.06459	0.902787	1.03262	0.952851	1.05975	0.952684	-0.016791	0.858759
			C34:3	756.554	1.14217	0.7454	1.11243	0.94314	0.955637	1.12432	0.0110635	0.958882	1.01866	0.924675	1.05666	1.16645	0.983512	1.10741	0.118743	0.267572	0.899972	0.926485	1.17354	0.883693	1.27669	1.12846	0.132618	0.540174	0.931833	1.08154	0.986623	1.14568	1.28438	1.13606	0.249391	0.0437297				C34:3	756.554	1.01902	0.992237	0.988745	0.967512	1.00279	1.00068	-0.0140228	0.551561
			C34:4	754.538	1.24322	0.576582	1.1802	0.73971	0.95358	1.17942	-0.062552	0.872213	1.01609	0.901125	1.08278	1.16564	0.910795	0.984055	0.0287997	0.838083	0.954268	0.965446	1.08029	0.977461	1.45624	1.29025	0.311872	0.173758	0.748958	1.13509	1.11595	1.19956	1.23185	1.26057	0.29943	0.143205				C34:4	754.538	1.14582	0.811908	1.04227	0.909156	0.973998	0.910744	-0.102683	0.53358
			C36:1	788.616	1.12566	0.741768	1.13257	1.11459	1.28049	1.27508	0.290882	0.186128	1.00006	0.97194	1.028	1.10947	0.949317	1.14539	0.0949941	0.336731	0.968085	0.952164	1.07975	0.843748	0.895938	0.889545	-0.190322	0.0464245	0.973698	1.03855	0.987753	0.901995	0.993625	0.903806	-0.0998314	0.137619				C36:1	788.616	1.07736	0.870202	1.05244	0.900433	1.12935	0.904017	-0.0321943	0.836116
			C36:2	786.601	1.03807	0.922024	1.03991	0.976869	1.02752	1.06026	0.0307594	0.663309	1.00861	0.994255	0.997134	1.02845	1.02408	1.00403	0.0269461	0.0962051	0.980963	0.994151	1.02489	0.95448	1.00311	0.974502	-0.0330341	0.303594	0.996617	1.01946	0.98392	0.981895	1.00069	0.989487	-0.013494	0.472304				C36:2	786.601	0.968833	0.977561	1.05361	0.961328	1.00521	0.94374	-0.0438065	0.410036
			C36:3	784.585	1.02043	0.840836	1.13873	1.01623	1.15087	1.24227	0.184541	0.277578	1.01772	1.00443	0.977854	1.08158	1.03041	1.08839	0.0932814	0.0371525	0.949346	0.954417	1.09624	0.870566	1.00406	0.9363	-0.093919	0.36453	1.04204	1.13328	1.07676	1.00339	1.05833	1.04988	-0.0637057	0.212545				C36:3	784.585	1.05444	0.910207	1.03535	0.966587	1.10687	0.959677	0.0158443	0.875089
			C36:4	782.569	1.02703	0.845209	1.12776	0.92094	1.0318	1.17358	0.0595026	0.722226	0.951174	0.976974	1.07185	1.03451	0.953192	1.04011	0.013314	0.85076	0.936932	0.954246	1.10882	0.867219	1.04356	1.01274	-0.0372562	0.75746	0.948315	1.05057	1.00111	0.971424	0.93264	0.995561	-0.0490965	0.390158				C36:4	782.569	1.03772	0.949653	1.01263	1.01855	1.10403	1.02215	0.0679743	0.27608
			C38:2	814.632	1.07539	0.707389	1.21722	0.931646	1.21898	1.23478	0.174365	0.517193	1.01751	0.946423	1.03607	1.158	1.0632	1.12144	0.156029	0.0423515	1.00394	1.02033	0.975732	0.928458	1.08037	1.06544	0.0352826	0.64688	1.16228	1.18713	1.2115	1.3497	1.36228	1.38642	0.20281	0.000551979				C38:2	814.632	1.00995	0.902546	1.0875	0.930843	1.04379	0.828562	-0.0978905	0.468973
			C38:3	812.616	1.07763	0.765566	1.15681	1.03679	1.27331	1.34313	0.28421	0.223202	0.966664	0.965592	1.06774	1.09366	0.97512	1.16377	0.10771	0.296625	0.954056	0.918279	1.12767	0.760769	0.981496	0.967146	-0.146983	0.371212	0.890641	1.08923	1.02012	1.01621	1.09575	1.08879	0.0934475	0.35155				C38:3	812.616	0.983671	0.878175	1.13815	0.852923	1.13545	0.937411	-0.0361371	0.837059
			C38:4	810.601	1.11156	0.936233	0.952204	0.710314	0.740543	0.943976	-0.325037	0.0941191	1.03046	0.998589	0.970954	1.01078	0.815673	0.86899	-0.154442	0.169771	0.969829	0.930559	1.09961	0.860484	1.01911	0.977246	-0.0705428	0.531322	0.891892	1.05715	1.05095	0.932627	0.935273	0.308815	-0.46281	0.27142				C38:4	810.601	1.06817	0.998157	0.93367	1.05807	1.16782	1.14116	0.166519	0.0744269
			C38:5	808.585	1.0361	0.900647	1.06325	0.954452	1.0664	1.17242	0.0900717	0.468667	0.988547	0.963987	1.04747	1.00466	0.948399	1.03145	-0.00746719	0.88931	0.945829	0.963929	1.09024	0.862089	1.04828	1.04534	-0.0214582	0.856407	0.945527	1.05012	1.00436	0.903481	0.892141	0.949867	-0.127899	0.0727014				C38:5	808.585	1.0049	0.966473	1.02863	0.998089	1.11189	1.04162	0.0711189	0.251994
			C40:2	842.663	1.18696	0.58504	1.228	0.861788	1.30349	1.25487	0.189099	0.605903	1.09855	0.999906	0.901541	1.19587	0.951529	1.07208	0.101867	0.46469	0.795921	0.965306	1.23877	0.710767	1.08404	0.940653	-0.133177	0.62882	0.904184	1.12056	0.975258	1.17991	1.41972	1.25035	0.35989	0.0412661				C40:2	842.663	0.941773	0.937488	1.12074	0.813153	1.01875	0.790438	-0.194109	0.25339
			C40:3	840.648	1.14537	0.653471	1.20116	0.955837	1.01022	1.34828	0.143756	0.648487	1.04334	0.928563	1.0281	1.1887	1.053	1.13306	0.169821	0.0792465	0.943803	0.894212	1.16198	0.881747	1.26472	1.12401	0.124539	0.551471	0.945251	1.07168	0.983067	1.17402	1.18156	1.25306	0.266495	0.0108722				C40:3	840.648	0.945163	0.90274	1.1521	0.99824	1.18511	1.0088	0.0895673	0.549098
			C40:4	838.632	1.18103	0.567997	1.25097	1.0061	1.21988	1.33248	0.246289	0.476311	1.07272	0.977733	0.949549	1.17904	1.03716	1.17963	0.178804	0.0938309	1.04966	0.952696	0.997647	0.928558	1.38604	1.22006	0.23661	0.262041	0.955777	1.06169	0.982531	1.09095	0.965336	1.18094	0.109794	0.322652				C40:4	838.632	1.06409	0.856621	1.07929	0.956281	1.12006	0.960206	0.017468	0.898682
			C40:5	836.616	1.08381	0.755105	1.16109	0.969501	1.03702	1.21522	0.102878	0.635802	0.993173	0.939796	1.06703	0.943701	0.855103	0.960301	-0.120762	0.178444	0.923185	0.992099	1.08472	0.786218	1.21046	1.02984	0.0126967	0.949641	0.923174	1.12546	0.951366	0.744461	0.841056	0.71054	-0.385805	0.0343345				C40:5	836.616	1.02327	0.879588	1.09714	1.02342	1.16948	1.01999	0.0989077	0.428693
			C40:6	834.601	1.06584	0.802747	1.13141	0.860508	1.00884	1.14635	0.00752991	0.969818	1.00018	0.927206	1.07261	0.995801	0.870294	0.973364	-0.079346	0.401383	0.977478	0.914238	1.10828	0.78717	0.96426	0.957216	-0.147391	0.29845	0.959084	0.994736	1.04618	0.822384	0.771938	0.854109	-0.293105	0.00616069				C40:6	834.601	0.959096	0.952778	1.08813	1.01581	1.02201	0.913238	-0.0237276	0.787037
			C42:3	868.679	1.21156	0.517718	1.27072	0.785772	1.09386	1.06686	-0.0259621	0.94881	1.11654	0.858711	1.02475	1.31883	0.923547	1.14633	0.175773	0.397991	0.91472	0.873427	1.21185	0.918624	1.38334	1.1551	0.204584	0.424169	0.949712	1.07025	0.980036	1.32854	1.37874	1.37352	0.443889	0.000805772				C42:3	868.679	1.16186	0.792714	1.04543	0.834523	1.17038	1.0735	0.0372157	0.868216
			C42:4	866.663	1.19337	0.594478	1.21215	0.874175	0.985453	1.33077	0.0887757	0.808399	0.99541	0.869841	1.13475	1.26702	0.879517	1.05577	0.0941466	0.645187	0.955089	0.874861	1.17005	0.842589	1.14972	1.00234	-0.0025759	0.989299	0.930122	1.1017	0.968174	1.09023	0.951017	0.939872	-0.00910875	0.933658				C42:4	866.663	1.06143	0.818841	1.11973	0.920817	1.09894	1.01282	0.0155811	0.922985
		PE	C34:1	716.524	1.08362	0.891533	1.02485	1.09974	1.10201	1.17331	0.169953	0.112879	1.01898	0.965618	1.01541	1.10697	1.02774	1.16219	0.136147	0.081104	1.05458	0.936645	1.00878	0.981825	1.05997	1.22125	0.121255	0.326059	0.925683	1.15382	0.920494	1.41927	1.63975	1.54164	0.616878	0.00592705			PE	C34:1	716.524	1.01919	0.941142	1.03967	1.16084	0.998408	0.873648	0.0157352	0.907251
			C36:1	744.555	1.10735	0.862319	1.03033	1.09876	1.10313	1.14022	0.155798	0.195858	0.953646	0.978425	1.06793	1.15771	1.02013	1.14578	0.14779	0.126591	1.04164	0.862515	1.09585	0.844467	0.784557	0.977216	-0.202993	0.221058	0.96493	1.07237	0.962702	1.23589	1.22171	1.14837	0.265426	0.0111054				C36:1	744.555	1.08393	0.948329	0.967741	1.11573	0.927338	0.743778	-0.106329	0.571471
			C36:2	742.539	1.0908	0.889258	1.01994	1.07097	1.10142	1.10613	0.128082	0.196984	1.03346	0.963983	1.00256	1.11556	1.00597	1.14903	0.124573	0.131333	1.01759	0.930929	1.05149	0.842482	0.769532	0.963402	-0.220157	0.102098	0.896645	1.11975	0.983601	1.14476	1.315	1.25462	0.308163	0.0436974				C36:2	742.539	1.03089	0.953816	1.0153	1.09208	0.953517	0.807334	-0.0725187	0.59712
			C36:3	740.524	1.10376	0.867764	1.02847	1.13504	1.16061	1.08707	0.173219	0.154852	1.01647	0.929874	1.05366	1.13441	1.0662	1.26874	0.209705	0.088765	0.966889	0.957579	1.07553	0.777923	0.728588	0.791299	-0.384702	0.0052542	0.957185	1.10276	0.940058	1.03056	1.33359	1.04829	0.185839	0.282973				C36:3	740.524	0.994379	1.00354	1.00208	1.16043	0.870167	0.731808	-0.119037	0.564718
			C38:4	766.539	1.15295	0.821304	1.02575	1.0938	1.11132	1.13828	0.156356	0.305345	0.995976	0.937505	1.06652	1.04195	0.938134	1.00658	-0.00642572	0.93092	1.06823	0.833722	1.09805	1.12886	0.979917	1.14226	0.11594	0.443231	0.921604	1.02677	1.05162	1.17556	1.35993	1.39654	0.390314	0.0171699				C38:4	766.539	1.03008	0.908366	1.06156	1.20724	1.02941	0.837539	0.035245	0.842294
			C38:5	764.524	1.15662	0.850734	0.992649	1.03348	1.0507	1.24908	0.151968	0.378312	1.05142	0.984491	0.964088	1.15328	1.01411	1.07905	0.113898	0.162757	1.07527	0.865401	1.05933	1.02005	1.21479	1.2285	0.207197	0.180414	0.872475	1.0998	1.02772	1.15787	1.44743	1.37923	0.409448	0.0407858				C38:5	764.524	1.05065	0.905904	1.04345	1.13807	0.898482	0.826233	-0.0675433	0.686574
			C40:2	798.602	1.19953	0.705107	1.09536	1.29364	1.24733	1.35222	0.375991	0.124454	1.21511	0.778853	1.00604	1.10897	1.07657	1.59865	0.335023	0.28253	0.921863	0.913243	1.16489	0.845237	1.14619	1.34098	0.151602	0.541285	1.02291	1.11149	0.878422	2.15576	2.5778	2.10662	1.18292	0.0014808				C40:2	798.602	1.08127	0.840621	1.07811	1.21812	0.976107	0.580434	-0.112651	0.729149
			C40:3	796.586	1.02907	0.879078	1.09185	0.980305	0.977411	1.03539	-0.00331751	0.973857	1.00124	0.902722	1.09603	1.12188	0.929925	1.07302	0.0588148	0.631258	0.880504	0.882343	1.23715	0.748083	0.702791	0.825213	-0.398407	0.123179	1.02456	1.01287	0.962576	1.03893	1.29883	1.02558	0.164927	0.253813				C40:3	796.586	1.0868	0.901247	1.01195	1.21587	0.956459	0.734209	-0.0456594	0.84486
			C42:1	828.649	1.21362	0.663847	1.12253	1.05202	1.17192	1.61515	0.3558	0.311056	1.054	0.904447	1.04156	1.37303	1.02251	1.25382	0.282678	0.129191	1.17504	0.751857	1.0731	1.15003	1.19387	1.03604	0.172034	0.404179	0.969579	1.15532	1.0118	1.50317	1.86127	1.64829	0.676347	0.00612862				C42:1	828.649	1.14745	0.921554	0.930991	1.43677	0.988597	0.699997	0.0590637	0.862709
		PS	C32:0	734.498	1.31977	0.620216	1.06001	0.889074	0.922105	1.17335	-0.0074579	0.982663	1.00657	0.862486	1.13094	1.19413	0.704518	0.866038	-0.117849	0.656642	0.907246	0.884316	1.20844	1.57373	1.75005	1.89399	0.79847	0.00610178	0.839508	1.18026	0.980235	2.00767	2.01117	2.44821	1.10815	0.00281505			PS	C32:0	734.498	1.29498	0.691297	1.01372	0.933273	1.05401	0.733578	-0.140899	0.662653
			C32:1	732.482	1.32878	0.675313	0.995904	0.832929	0.92148	1.1251	-0.0591411	0.855973	1.03682	0.933981	1.0292	1.35932	0.893433	0.976502	0.106237	0.631139	1.03761	0.846699	1.11569	1.12662	1.31856	1.60636	0.433507	0.0945923	0.904563	1.13248	0.962952	2.41023	2.88464	2.99129	1.46574	0.000770655				C32:1	732.482	1.16999	0.794879	1.03513	0.954184	0.855558	0.73894	-0.235211	0.298824
			C34:0	762.529	1.30436	0.59356	1.10208	0.936203	0.957476	1.25177	0.0683028	0.846424	0.996823	0.847107	1.15607	1.27464	0.646597	0.82279	-0.128667	0.70162	0.964002	0.974843	1.06115	1.58579	1.70612	1.83776	0.773902	0.000848374	0.894521	1.12754	0.977939	1.73934	1.7061	2.43066	0.969895	0.0175401				C34:0	762.529	1.26903	0.683673	1.0473	1.05956	1.06569	0.854577	-0.00973526	0.972623
			C34:1	760.513	1.31617	0.644883	1.03894	0.875586	0.973239	1.21203	0.0289739	0.93062	1.03263	0.896338	1.07103	1.34485	0.848024	0.96768	0.0752172	0.753059	0.937695	0.912953	1.14935	1.00422	1.11681	1.24428	0.165778	0.299145	0.819078	1.23293	0.947987	1.58278	2.21089	1.97738	0.943872	0.0137823				C34:1	760.513	1.24651	0.74735	1.00614	0.95013	1.04054	0.751349	-0.129726	0.634797
			C36:1	788.545	1.20852	0.733229	1.05825	0.955195	1.04493	1.15451	0.072508	0.751028	1.03414	0.916666	1.0492	1.19656	0.879706	0.981657	0.02759	0.859556	0.959614	0.901408	1.13898	0.854292	0.901377	1.04846	-0.0974083	0.518643	0.843068	1.19365	0.963282	1.05674	1.46035	1.28617	0.342275	0.160587				C36:1	788.545	1.14383	0.852148	1.00402	0.934427	1.01459	0.851152	-0.0994488	0.528159
			C36:2	786.529	1.38594	0.608771	1.00529	0.824036	0.278861	1.04823	-0.479872	0.426777	1.0817	0.780707	1.13759	1.27353	0.772928	0.840834	-0.0552434	0.854408	0.892894	0.963461	1.14364	0.739016	0.667931	0.798933	-0.443608	0.0341098	0.840587	1.27791	0.881499	0.96546	1.20511	1.20294	0.16929	0.481315				C36:2	786.529	1.20564	0.779284	1.01507	0.877468	1.19471	0.786335	-0.0696976	0.800555
			C38:1	816.576	1.37843	0.550666	1.0709	1.41434	1.08118	1.45297	0.396337	0.30483	1.16946	0.726217	1.10433	1.40051	0.977928	0.977227	0.161635	0.580494	0.815006	1.01126	1.17373	0.977087	0.860163	0.850186	-0.158732	0.402689	0.918542	1.06217	0.838857	1.02496	1.498	1.1807	0.393475	0.127765				C38:1	816.576	1.25069	0.768222	0.981092	0.753141	1.02758	0.760527	-0.239425	0.409705
			C38:2	814.56	1.38013	0.405644	1.21423	0.5369	1.23203	1.45973	0.105976	0.861379	0.69315	1.04037	1.26648	1.35025	0.57707	0.588875	-0.253717	0.625321	1.22269	0.725021	1.05229	1.03474	0.979013	1.10235	0.0547834	0.809512	0.810967	1.05508	1.13396	1.98657	1.92579	1.99668	0.977959	0.000626007				C38:2	814.56	1.34324	0.526358	1.1304	0.655137	0.952001	0.649784	-0.410607	0.40166
			C38:3	812.545	1.20124	0.776283	1.02248	0.904843	0.979674	1.14994	0.0164751	0.939822	1.01868	0.893295	1.08803	1.24911	0.830756	0.941236	0.0101147	0.961654	0.969683	0.909116	1.1212	0.903207	0.983216	1.24257	0.0607334	0.738818	0.761716	1.07405	0.823071	1.03203	1.47597	1.36672	0.5433	0.069078				C38:3	812.545	0.947967	0.935434	1.1166	1.08392	1.2388	0.98929	0.142746	0.327318
			C38:4	810.529	1.31391	0.625174	1.06092	0.822732	0.957037	1.24752	0.0130621	0.971228	0.992157	0.863565	1.14428	1.16519	0.794365	0.909926	-0.0641723	0.765589	1.02189	0.812425	1.16568	0.745145	0.932443	1.03057	-0.147648	0.503242	0.92686	1.26392	0.809222	1.43847	1.57052	1.69834	0.649946	0.0216036				C38:4	810.529	1.28457	0.715238	1.00019	0.843847	1.13914	0.899062	-0.0578679	0.84431
			C40:3	840.576	1.38663	0.630147	0.983224	1.04078	1.06494	1.25797	0.165082	0.624686	1.1151	0.909613	0.975283	1.47531	0.853767	0.998999	0.149726	0.608837	1.14842	1.02731	0.824266	0.731702	0.795493	0.874331	-0.321011	0.1253	0.913051	1.21019	0.876759	1.11796	2.00071	1.7328	0.69346	0.0937205				C40:3	840.576	1.22166	0.85496	0.923383	1.06879	1.04574	0.84915	-0.0175742	0.931534
			C40:4	839.568	1.32113	0.646206	1.03266	0.87813	0.972605	1.22667	0.0367526	0.912876	1.04137	0.86407	1.09456	1.19827	0.738129	0.881004	-0.0905949	0.710714	1.09487	0.826654	1.07847	0.844132	0.917099	1.01658	-0.111015	0.500682	0.788056	1.1729	1.03905	0.896823	1.11544	1.11622	0.0605019	0.76586				C40:4	839.568	1.23175	0.779712	0.988542	1.02174	1.09471	0.882207	-0.000645828	0.997681
[truncated: 24 more columns]
